# Supplementary material for: Thermal plasticity in coral reef symbionts is mediated by oxidation of membrane lipids
Source: Research Square preprint supplement (doi:10.21203/rs.3.rs-96835/v1), 2020-11-03
Supplement: Supplementary file 2 [file ad8a9f12de9ec781059260d0.xlsx]

## Sheet: Table S1_Lipid compounds
Table S1: List of all identified lipid species and pigments sorted into main lipid classes.					Replicate	1	2	3	1	2	3	1	2	3	1	2	3	1	2	3	1	2	3	1	2	3	1	2	3	1	2	3	1	2	3	1	2	3	1	2	3	1	2	3	1	2	3	1	2
					Species ITS2	A1	A1	A1	A1	A1	A1	A1	A1	A1	A1	A1	A1	A1	A1	A1	B1	B1	B1	B1	B1	B1	B1	B1	B1	B1	B1	B1	B1	B1	B1	C1	C1	C1	C1	C1	C1	C1	C1	C1	C1	C1	C1	C1	C1
					HS (Control/ Treatment)	Control	Control	Control	Treatment	Treatment	Treatment	Treatment	Treatment	Treatment	Control	Control	Control	Treatment	Treatment	Treatment	Control	Control	Control	Treatment	Treatment	Treatment	Treatment	Treatment	Treatment	Control	Control	Control	Treatment	Treatment	Treatment	Control	Control	Control	Treatment	Treatment	Treatment	Treatment	Treatment	Treatment	Control	Control	Control	Treatment	Treatment
					Time	T4	T4	T4	T4	T4	T4	T28	T28	T28	T244	T244	T244	T244	T244	T244	T4	T4	T4	T4	T4	T4	T28	T28	T28	T244	T244	T244	T244	T244	T244	T4	T4	T4	T4	T4	T4	T28	T28	T28	T244	T244	T244	T244	T244
	Lipid class	Lipid group	Lipid Subgroup	PCA/MDS (Fig.3)	Compounds in pg/cell	AC1_4	AC2_4	AC3_4	AT1_4	AT2_4	AT3_4	AT1_28	AT2_28	AT3_28	AC1_244	AC2_244	AC3_244	AT1_244	AT2_244	AT3_244	BC1_4	BC2_4	BC3_4	BT1_4	BT2_4	BT3_4	BT1_28	BT2_28	BT3_28	BC1_ 244	BC2_ 244	BC3_ 244	BT1_244	BT2_244	BT3_244	CC1_4	CC2_4	CC3_4	CT1_4	CT2_4	CT3_4	CT1_28	CT2_28	CT3_28	CC1_244	CC2_244	CC3_244	CT1_244	CT2_244
	Membrane	aminolipids	DGCC	DGCC	DGCC (22:0/DHA)	0.0137877	0.0128177	0.0170687	0.0181626	0.021206	0.0175055	0.0870677	0.0114557	0.057221	0.0025082	0.00214755	0.00160442	0.00814676	0.00500969	0.0029412	0.00171122	0.00232576	0.00303019	0.000579954	0.000888705	0.00062021	0.000232846	0.00104988	0.000194813	0.00276206	0.00359587	0.00171827	0.00984937	0.00245983	0.00954272	0.0173934	0.0110728	0.00777407	0.00246037	0.00215077	0.000799504	0.016712	0.005039	0.00679734	0.0217748	0.017823	0.00840854	0.00535211	0.00524506
	Membrane	aminolipids	DGCC	DGCC	DGCC (14:0/DHA)	0.0147648	0.0153207	0.0172332	0.0200495	0.0176944	0.016742	0.0568147	0.0151997	0.0385383	0.00342191	0.00314985	0.00255057	0.00584678	0.00461023	0.00215292	0.0242413	0.023474	0.0300016	0.00158071	0.00454734	0.00179304	0.00134054	0.00198481	0.00502901	0.0206626	0.0258391	0.0137052	0.0641782	0.0376748	0.0685832	0.0317424	0.0226977	0.0225309	0.00722056	0.0042027	0.00332615	0.0419801	0.0120387	0.0137564	0.0361812	0.0207427	0.0142878	0.00842264	0.00889668
	Membrane	aminolipids	DGCC	DGCC	DGCC (15:0/DHA)	0.0042091	0.00366188	0.00404127	0.00517905	0.00443628	0.00521634	0.0135174	0.00377542	0.00902239	0.00107366	0.00132355	0.000588546	0.00252714	0.00175943	0.00139452	0.00339538	0.00300419	0.00346262	0.000496284	0.00138656	0.000361974	1.85304e-05	8.50313e-05	0.00112576	0.0044196	0.00529697	0.00320651	0.0148069	0.00409453	0.0123745	0.00567797	0.00319602	0.00348105	0.0024879	0.00148321	0.00133045	0.0107263	0.00235342	0.00269459	0.0128883	0.00745244	0.0054475	0.00324304	0.00345188
	Membrane	aminolipids	DGCC	DGCC	DGCC (16:0/16:0)	0.00102618	0.000874659	0.00136909	0.00440584	0.00571206	0.00421683	0.00241691	0.00232363	0.0034786	0.000413	0.000360579	0.000407112	0.00079135	0.000989587	0.000496896	0.00128319	0.00119213	0.00185068	0.00153359	0.00250266	0.00090729	0.00149843	0.00232833	0.00458537	0.0011232	0.00124607	0.000896061	0.00580016	0.00310171	0.0162594	0.00142213	0.00112864	0.00142925	0.00365186	0.00163875	0.00147542	0.00342379	0.00295011	0.00158392	0.00160314	0.00169002	0.0011295	0.000625139	0.00069323
	Membrane	aminolipids	DGCC	DGCC	DGCC (16:0/16:1)	0.016327	0.0141371	0.0145998	0.0225103	0.0146261	0.0267105	0.031345	0.0112596	0.0263623	0.00466731	0.00538586	0.00444817	0.0107783	0.00940864	0.00643345	0.0072629	0.00744676	0.0095144	0.00314888	0.00555603	0.00251628	0.000439719	0.00153004	0.00640212	0.00429126	0.0053404	0.00335615	0.0503181	0.012214	0.0528255	0.00889187	0.00555057	0.00420552	0.00558756	0.00211682	0.00336782	0.0161753	0.00603071	0.00447261	0.0133986	0.00435039	0.00636523	0.0032008	0.00361681
	Membrane	aminolipids	DGCC	DGCC	DGCC (16:0/18:1)	0.00471236	0.004909	0.00479839	0.00681106	0.00855588	0.0108058	0.0166836	0.00517641	0.0115817	7.04052e-05	0.0017773	0.000421586	0.00376522	0.00276211	0.00211242	0.00278389	0.00197859	0.00317267	0.00227732	0.00278299	0.00229668	0.00323468	0.00298978	0.00471445	0.00138215	0.00114348	0.000847302	0.0214025	0.0107081	0.0278616	0.00446245	0.00248011	0.00530903	0.00818807	0.00539228	0.00517051	0.0112462	0.0047106	0.00486174	0.000189284	0.00592966	0.0054775	0.00318919	0.00270318
	Membrane	aminolipids	DGCC	DGCC	DGCC (16:0/18:2)	0.00648743	0.00786705	0.00488266	0.00976227	0.00800044	0.0109885	0.0283197	0.00452279	0.0190247	0.00365835	0.00207589	0.0022645	0.0056872	0.00353861	0.00172271	0.00168732	0.00159859	0.00191159	0.000226149	0.00195649	0.000380486	0.000961188	0.00185694	0.00122863	0.00085932	0.0012592	0.000500257	0.0181838	0.00576125	0.0150491	0.00233533	0.00150172	0.00303644	0.00313004	0.00182022	0.00155728	0.00400819	0.00326452	0.00235001	0.00321117	0.00181924	0.00210083	0.00139307	0.00123115
	Membrane	aminolipids	DGCC	DGCC	DGCC (16:0/18:3)	0.00698514	0.00735192	0.00603316	0.0168193	0.022878	0.0207855	0.0381471	0.0107858	0.0325685	0.00358844	0.00419665	0.00446423	0.00783816	0.00813633	0.00585774	0.00268077	0.00249511	0.00305606	0.000389991	0.00153899	0.00043312	0.00063961	0.00184986	0.000898916	0.00115281	0.00132452	0.000864423	0.00920383	0.00122478	0.0101458	0.00379314	0.00174385	0.00389026	0.00249845	0.00150254	0.00022353	0.00461604	0.00173267	0.00137517	0.00269035	0.00212985	0.00209922	0.000985285	0.00109545
	Membrane	aminolipids	DGCC	DGCC	DGCC (16:0/18:4)	0.0750153	0.0723019	0.0853979	0.133288	0.13599	0.137034	0.394333	0.0488463	0.236162	0.0252675	0.0269039	0.0250914	0.0430474	0.0334139	0.0181452	0.0161864	0.0151159	0.0185674	0.00799354	0.0231975	0.00704923	0.00652301	0.00995797	0.0202778	0.00883108	0.0115075	0.00702327	0.0551893	0.0108754	0.0611984	0.00825638	0.00484926	0.00734954	0.00727442	0.00380067	0.00339218	0.0133813	0.00510681	0.00467637	0.0110073	0.0051441	0.0056311	0.00308103	0.00280809
	Membrane	aminolipids	DGCC	DGCC	DGCC (16:0/22:4)	0.00039627	0.000576962	0.000399013	0.00171558	0.000654151	0.000850345	0.00166796	0.000384742	0.00187112	0.000110774	0.000269831	0.000156199	0.000390235	0.000250658	0.000270715	0.000239346	0.000208918	0.000308903	3.65752e-05	0.000100614	0.000149601	0.00010054	0.000300189	0.000166661	0.000162469	0.000214246	0.000260497	0.00119094	0.00196421	0.0016105	0.000381816	0.000235032	0.000208969	0.000228775	0.00032189	0.00032646	0.000208595	0.000632146	0.00083418	0.000549679	0.000285589	0.000153311	0.000234264	8.17541e-05
	Membrane	aminolipids	DGCC	DGCC	DGCC (16:0/DHA)	1.22889	1.11275	1.12943	1.77342	1.81375	1.6452	5.2465	0.940977	3.56571	0.346366	0.334029	0.302332	0.785339	0.684985	0.364848	0.343685	0.362597	0.448179	0.051754	0.145485	0.0598922	0.0522486	0.147216	0.128005	0.413387	0.489788	0.316959	1.47674	0.837876	1.44089	0.975136	0.605376	0.799786	0.372463	0.243238	0.235139	1.50802	0.54525	0.59564	1.24617	0.931817	0.582782	0.349264	0.341517
	Membrane	aminolipids	DGCC	DGCC	DGCC (16:0/EPA)	0.035853	0.0309909	0.0299345	0.0584949	0.054282	0.0457191	0.125912	0.0416005	0.104419	0.0112158	0.00475799	0.00996413	0.0244045	0.0196005	0.0141426	0.0098728	0.00994344	0.0125275	0.00202025	0.00491853	0.00258438	0.00115091	0.00511782	0.00463318	0.0150547	0.015406	0.00970667	0.0482675	0.0297436	0.0672244	0.0248873	0.0133861	0.0194101	0.0118793	0.00832169	0.00756021	0.0378581	0.0213966	0.0195867	0.0449643	0.0260528	0.0204479	0.0133735	0.0106594
	Membrane	aminolipids	DGCC	DGCC	DGCC (16:1/DHA)	0.0471995	0.0415849	0.045327	0.0318679	0.0303347	0.0304849	0.0692741	0.012179	0.0483133	0.00310472	0.00331484	0.00253404	0.0146976	0.0117734	0.00822808	0.0158454	0.013859	0.0183354	0.00105763	0.00228565	0.000690243	0.000490877	0.00138901	0.00243749	0.00840682	0.010824	0.00539023	0.0299028	0.0174724	0.0334072	0.0203739	0.0119268	0.0134829	0.00263282	0.00109538	0.00132256	0.0311938	0.00712303	0.00811844	0.0334679	0.0181547	0.0147298	0.00651085	0.00822361
	Membrane	aminolipids	DGCC	DGCC	DGCC (18:0/28:7)	0.090255	0.0795383	0.111649	0.125732	0.121857	0.123402	0.614018	0.0734442	0.344982	0.0129971	0.0099694	0.00878005	0.0335729	0.0137308	0.0119671	0.017879	0.0242176	0.0371352	0.00447627	0.0121064	0.00441593	0.00281062	0.00894923	0.00830958	0.0414331	0.0477235	0.0229917	0.0697475	0.0508767	0.0987959	0.026296	0.0174241	0.0222349	0.0344194	0.0237977	0.0198172	0.0951816	0.0248323	0.0266081	0.0388406	0.0256492	0.0122507	0.0129077	0.0110211
	Membrane	aminolipids	DGCC	DGCC	DGCC (18:0/DHA)	0.0196513	0.0162194	0.0194184	0.0293889	0.0318706	0.0290685	0.12114	0.0173475	0.0743203	0.00584611	0.00518362	0.00473459	0.0130885	0.0116065	0.00513484	0.00484824	0.0059719	0.00866199	0.00164888	0.00270793	0.00162526	0.00141343	0.00293599	0.0036174	0.00921846	0.010657	0.0064211	0.0320639	0.0126426	0.0244827	0.0219294	0.0124753	0.0189325	0.0154011	0.0115713	0.00914457	0.0482132	0.0141098	0.0170524	0.0300447	0.0226194	0.012762	0.00874915	0.00797782
	Membrane	aminolipids	DGCC	DGCC	DGCC (18:1/18:1 )	0.00117954	0.00150811	0.00075633	0.0049533	0.00192678	0.0053331	0.0149638	0.00666048	0.00775964	0.000225024	0.000673325	0.00050637	0.00164605	0.00141357	0.0015203	0.00577366	0.00532595	0.00577249	0.00645592	0.0103583	0.00907177	0.0170975	0.0176423	0.0145013	0.000890125	0.00112886	0.000530294	0.119305	0.058995	0.105865	0.0018763	0.00152086	0.00188712	0.0051177	0.00424094	0.00323441	0.00517589	0.00253808	0.00285801	0.00145995	0.00096158	0.00110439	0.000772062	0.000455188
	Membrane	aminolipids	DGCC	DGCC	DGCC (18:1/28:7)	0.0125395	0.0106287	0.0153462	0.0133014	0.0139841	0.0137909	0.0478227	0.00350441	0.0268258	0.00209246	0.000970728	0.0018162	0.0051905	0.00150961	0.00148866	0.00284363	0.00212849	0.00452863	0.000456635	0.00162961	0.000462531	0.000130375	0.00154649	0.00112558	0.00595919	0.00652992	0.00298721	0.00537573	0.00397249	0.00322302	0.0131861	0.00702488	0.00538603	0.00115572	0.000807548	0.000330068	0.0112202	0.00301307	0.00420789	0.0161013	0.0130963	0.00415026	0.00529062	0.0036942
	Membrane	aminolipids	DGCC	DGCC	DGCC (18:1/DHA)	0.0166894	0.0146578	0.0153797	0.0114792	0.0122285	0.0102267	0.0257671	0.00130129	0.0179653	0.000917043	0.00121958	0.000203604	0.00364934	0.00316329	0.00151994	0.00429726	0.00508126	0.00650842	0.000313559	0.000910066	0.00085196	0.000101051	0.000484983	0.00106939	0.00100723	0.00234017	0.000817817	0.0122539	0.00208792	0.0112819	0.0168746	0.00849123	0.0173861	0.00803008	0.00564174	0.00465697	0.0288877	0.00758878	0.0111782	0.00828869	0.0121082	0.00785813	0.00386766	0.00440614
	Membrane	aminolipids	DGCC	DGCC	DGCC (18:3/DHA)	0.00518108	0.00501604	0.00457577	0.00151683	0.0023438	0.00265646	0.00992931	0.00200009	0.00500672	0.000832356	0.000846905	0.000914712	0.00135345	0.000581295	0.00102125	0.00417688	0.00423146	0.00511039	0.000257387	0.000514237	0.000145395	2.0343e-05	0.000206018	0.000263441	0.00191992	0.001804	0.00111383	0.00591704	0.00341812	0.00173142	0.00478934	0.00129707	0.00422979	0.00102238	0.000703678	0.000641695	0.00447186	0.000792388	0.0013409	0.00227334	0.0015852	0.000977619	0.000543711	0.000517052
	Membrane	aminolipids	DGCC	DGCC	DGCC (18:4/DHA)	0.0473055	0.0425814	0.0466039	0.0134397	0.0194058	0.0125288	0.0645501	0.00632153	0.0352435	0.010441	0.00799752	0.00419628	0.0178751	0.0126711	0.00756499	0.00656043	0.00723183	0.00821518	0.000986137	0.00231676	0.00133358	5.52645e-05	0.00307366	0.00162546	0.00301381	0.00326243	0.00210511	0.0103817	0.00468207	0.00996959	0.0092381	0.00506304	0.00673409	0.00437537	0.00178093	0.00130422	0.014606	0.00262438	0.00416874	0.00630033	0.00394963	0.00230609	0.00154847	0.00154046
	Membrane	aminolipids	DGCC	DGCC	DGCC (20:0/DHA)	0.00361805	0.00323435	0.0043828	0.00718826	0.00561269	0.00563328	0.0236481	0.00193772	0.0169266	0.000337856	0.00040236	0.000397533	0.00204995	0.00148294	0.000801634	0.000815264	0.00104577	0.00189306	0.000342599	0.00056132	0.000367967	0.000183307	0.000388765	0.000523971	0.000932052	0.00291482	0.00135901	0.0058436	0.00197304	0.00394685	0.00390667	0.00264995	0.00377442	0.00297601	0.00170085	0.00100076	0.00712357	0.000865581	0.000844493	0.00215096	0.00379256	0.00217735	0.00169727	0.00125215
	Membrane	aminolipids	DGCC	DGCC	DGCC (DHA/DHA)	0.0980806	0.0792154	0.0974	0.0285755	0.0355384	0.0266639	0.43899	0.0513841	0.28162	0.0302357	0.0245065	0.0171073	0.0544129	0.0360961	0.0228481	0.0420193	0.0416944	0.0494488	0.00165051	0.0047574	0.00441207	0.000523733	0.00771707	0.00317471	0.0476166	0.0520144	0.0251044	0.0426625	0.0387215	0.0488487	0.108855	0.0538885	0.0689967	0.0225903	0.0142504	0.0094286	0.184488	0.0365492	0.0576906	0.129828	0.0867854	0.0466749	0.0312827	0.0338465
	Membrane	aminolipids	DGCC	DGCC	DGCC (EPA/DHA)	0.00529957	0.0041569	0.00555038	0.00249309	0.00308837	0.00331622	0.0458624	0.00404535	0.0293495	0.0014243	0.00111355	0.00102051	0.00260298	0.00184099	0.00145652	0.00280429	0.00214525	0.0031182	0.000264168	0.000789622	0.000650758	0.000276727	0.000716487	0.000339664	0.00355817	0.00300816	0.00142551	0.00997902	0.00294559	0.00316922	0.00613145	0.00321729	0.00352579	0.00172054	0.00116579	0.00063382	0.0111201	0.00236912	0.00393911	0.00915919	0.00547188	0.00337591	0.00250058	0.00232257
	Membrane	glycolipids	DGDG	glycolipids	DGDG (14:0/18:1)	0.0313437	0.027469	0.0238926	0.0207255	0.0260119	0.0280903	0.152126	0.0316517	0.109348	0.0124147	0.0121687	0.0136331	0.0269394	0.0386271	0.0208106	0.00375276	0.00356748	0.00411601	0.00149895	0.00193441	0.00124692	0.00148366	0.00744938	0.00341007	0.00315594	0.00395835	0.00294578	0.0485136	0.0108235	0.0260198	0.0272768	0.0235241	0.0249284	0.00938191	0.00503242	0.003841	0.0480097	0.0268628	0.0241587	0.0290167	0.0198937	0.0158525	0.00919567	0.0098193
	Membrane	glycolipids	DGDG	glycolipids	DGDG (14:0/18:4)	0.000398777	0.0003878	0.000534278	0.000534434	0.000915736	0.000409819	0.00281341	0.00365233	0.00112983	0.000144649	0.000152431	0.000117537	0.000764917	0.000772159	0.000468996	0.00714528	0.0098204	0.0100271	0.00125808	0.00198035	0.000816984	0.000412405	0.00243883	0.00450276	0.0111574	0.0150374	0.00978819	0.0479217	0.0168851	0.0333553	0.048342	0.0372528	0.0385652	0.02613	0.0186934	0.0119801	0.0637404	0.020877	0.02673	0.0450911	0.034087	0.0186254	0.0133866	0.0146141
	Membrane	glycolipids	DGDG	glycolipids	DGDG (16:0/16:1)	0.0313437	0.027469	0.0238926	0.0207255	0.0260119	0.0280903	0.152126	0.0316517	0.109348	0.0124147	0.0121687	0.0136331	0.0269394	0.0386271	0.0208106	0.00375276	0.00356748	0.00411601	0.00149895	0.00193441	0.00124692	0.00148366	0.00744938	0.00341007	0.00315594	0.00395835	0.00294578	0.0485136	0.0108235	0.0260198	0.0272768	0.0235241	0.0249284	0.00938191	0.00503242	0.003841	0.0480097	0.0268628	0.0241587	0.0290167	0.0198937	0.0158525	0.00919567	0.0098193
	Membrane	glycolipids	DGDG	glycolipids	DGDG (16:0/18:1)	0.0164483	0.0179205	0.0172707	0.0114917	0.0112948	0.0119386	0.0487083	0.00773153	0.0278139	0.00884057	0.00842956	0.00825975	0.013108	0.0178286	0.00618066	0.000980991	0.00107462	0.00172648	0.000607423	0.00110755	0.000455866	0.000628759	0.00846545	0.00106209	0.000574079	0.000546869	0.00040633	0.0256969	0.00338786	0.00535551	0.00752462	0.00457739	0.00475787	0.00353921	0.00208098	0.00233463	0.0144954	0.00633584	0.00671333	0.0063616	0.00285414	0.00235604	0.00158011	0.00192902
	Membrane	glycolipids	DGDG	glycolipids	DGDG (16:0/18:4)	0.0116699	0.00977027	0.00899864	0.0175309	0.0184739	0.0218118	0.0846497	0.021829	0.0569076	0.00896729	0.00893465	0.00707347	0.0152428	0.0210217	0.00889725	0.0116098	0.013854	0.0159035	0.00258812	0.00664773	0.00369097	0.0017131	0.0206619	0.00884405	0.0269962	0.0369925	0.025894	0.14009	0.0358283	0.0743332	0.122773	0.0836436	0.0813016	0.0596113	0.0297691	0.0252031	0.185203	0.0557698	0.0636065	0.173417	0.144751	0.0783778	0.0603888	0.0598407
	Membrane	glycolipids	DGDG	glycolipids	DGDG (16:1/18:4)	0.00222027	0.00204311	0.00167096	0.00307909	0.00259573	0.00280857	0.0136306	0.00240081	0.00798047	0.000588589	0.000746761	0.00031517	0.00392253	0.0044188	0.00303148	0.00257286	0.00268479	0.00260168	0.00023517	0.00118566	0.000319596	7.13024e-05	0.022942	0.00149641	0.00402019	0.00479151	0.00311723	0.0135518	0.00292254	0.0101189	0.0229856	0.0198129	0.0174591	0.00973584	0.0049992	0.00349884	0.0326028	0.00810835	0.0103345	0.0513075	0.0315159	0.0201583	0.0130665	0.0149694
	Membrane	glycolipids	DGDG	glycolipids	DGDG (16:2/18:4)	0.0339761	0.0295594	0.0194757	0.0237254	0.0300842	0.0415624	0.123841	0.0479919	0.0799631	0.0554773	0.0442752	0.0225678	0.0659091	0.0793945	0.0689553	0.0109487	0.00963359	0.0123447	0.00140692	0.00290024	0.00218666	0.00159444	0.00752161	0.00326433	0.025044	0.0357469	0.0185355	0.0972493	0.0674943	0.0921047	0.0492842	0.0296782	0.0268021	0.0471638	0.0157721	0.0206596	0.171287	0.0642881	0.0511403	0.136606	0.0805873	0.083662	0.0246321	0.0309385
	Membrane	glycolipids	DGDG	glycolipids	DGDG (18:3/18:4)	0.0293941	0.0292503	0.0341372	0.0604361	0.0705371	0.0696269	0.218965	0.0442122	0.143521	0.0277465	0.0240954	0.0177885	0.0445641	0.0568512	0.0211327	0.031497	0.0372723	0.0368849	0.00515967	0.0189121	0.00750084	0.001624	0.0124678	0.0245964	0.0366221	0.038957	0.0192616	0.0830653	0.0482042	0.0773865	0.167825	0.107574	0.130674	0.128365	0.0723727	0.0637825	0.287778	0.0832648	0.115029	0.255872	0.17883	0.109289	0.0813385	0.0780449
	Membrane	glycolipids	DGDG	glycolipids	DGDG (18:4/18:4)	0.453624	0.44789	0.552825	0.777392	0.940615	0.950017	3.16827	0.467084	1.83276	0.324106	0.322133	0.258782	0.590519	0.723069	0.212512	0.327313	0.405373	0.420747	0.0622449	0.20891	0.0774217	0.0380745	0.119523	0.205571	0.303754	0.423406	0.26664	0.918408	0.461852	0.773545	1.67082	1.24457	1.32352	1.19408	0.670394	0.508929	2.78008	0.806294	1.0978	2.8948	1.99091	1.3087	0.591181	0.744762
	Membrane	glycolipids	DGDG	glycolipids	DGDG (18:4/18:5)	1.65196	1.55444	1.80661	2.42427	2.83631	3.11623	7.76281	1.13162	5.52628	0.843033	0.832447	0.653785	1.47242	1.94472	0.585814	0.590635	0.723	0.67438	0.102861	0.380386	0.102332	0.0443832	0.248817	0.319691	0.517139	0.655647	0.37601	0.83179	0.623974	0.958602	0.945331	0.640273	0.64525	0.666232	0.361276	0.288472	1.47062	0.358324	0.533575	1.60492	1.02561	0.63725	0.340986	0.421752
	Membrane	glycolipids	DGDG	glycolipids	DGDG (18:4/DHA)	0.00658645	0.00560237	0.00415355	0.0051117	0.00717589	0.00648479	0.0248613	0.0446213	0.0177497	0.00180125	0.00170356	0.0014672	0.0133396	0.0127583	0.00814619	0.0281337	0.0344405	0.037932	0.00262968	0.00866944	0.00652913	0.0017743	0.0049956	0.0103897	0.105176	0.125958	0.078548	0.182131	0.0964372	0.167487	0.194323	0.126538	0.167625	0.107724	0.0544362	0.0423022	0.415074	0.087672	0.130668	1.13724	0.866096	0.530522	0.261645	0.297519
	Membrane	glycolipids	DGDG	glycolipids	DGDG (18:5/DHA)	0.000786959	0.000564552	0.00111519	0.000590215	0.00071468	0.00136122	0.00880184	0.000585952	0.00380954	0.000521634	0.000663021	0.000101424	0.00107265	0.000744777	0.000183641	0.000553229	0.000989134	0.00142053	5.25846e-05	0.000136932	2.55564e-05	3.33382e-05	0.000165637	5.12562e-05	0.00104969	0.00143667	0.000864092	0.00209105	0.000173411	0.000548948	0.011865	0.0102104	0.00476614	0.00653124	0.00248441	0.00159109	0.0284359	0.00248057	0.00436935	0.0124254	0.0102767	0.0050984	0.00298194	0.00356129
	Membrane	glycolipids	DGDG	glycolipids	DGDG (DHA/DHA)	0.000309843	0.000347397	0.000399777	0.000138958	0.000234468	0.000137897	0.00217934	0.000451264	0.00259372	0.000110751	8.48604e-05	2.43077e-05	0.000281943	0.000328486	0.000139874	0.000179245	7.9444e-05	0.000225835	2.41873e-05	0.00014486	0.000135257	1.41503e-05	7.60421e-05	0.000189483	0.00119671	0.00159104	0.000866805	0.00353357	0.000500853	0.00203314	0.00124347	0.00082366	0.00112792	0.000766225	0.000363416	0.00022647	0.00498815	0.000921101	0.00222205	0.0258389	0.0171504	0.0149724	0.00564899	0.00633772
	Membrane	glycolipids	MGDG	glycolipids	MGDG (14:0/16:0)	0.015006	0.0150187	0.012361	0.0125591	0.00961244	0.0108646	0.0541444	0.014764	0.0363639	0.0074304	0.00657709	0.00587545	0.00559841	0.00794317	0.00304833	0.0122996	0.013948	0.00955199	0.00673531	0.00638596	0.00477137	0.0238999	0.00464274	0.0147482	0.015126	0.0235591	0.0107527	0.0859119	0.0324424	0.0422822	0.0374747	0.0193623	0.0324575	0.0369973	0.0208197	0.0242384	0.0785731	0.0249325	0.0291545	0.0689866	0.0349769	0.0457411	0.0144554	0.0205598
	Membrane	glycolipids	MGDG	glycolipids	MGDG (16:0/18:1)	0.222716	0.21392	0.206408	0.0603255	0.053127	0.0560036	0.293306	0.0612487	0.18604	0.0437318	0.0523325	0.0364977	0.0521065	0.0555546	0.0218049	0.0165002	0.0179785	0.0183981	0.00595132	0.00945054	0.00651705	0.0088709	0.016489	0.00964737	0.0127023	0.0185256	0.0115244	0.0924099	0.00115845	0.0472432	0.117778	0.0617686	0.100996	0.0962565	0.0478199	0.0544255	0.228146	0.089852	0.110595	0.144203	0.0616009	0.0812177	0.0329051	0.0415963
	Membrane	glycolipids	MGDG	glycolipids	MGDG (16:0/18:2)	0.117518	0.102325	0.094244	0.0397644	0.0320687	0.0314494	0.38689	0.0940038	0.241923	0.051292	0.0544893	0.0508692	0.056009	0.0577146	0.0251973	0.0120912	0.0132728	0.0131075	0.000933735	0.00174238	0.00264247	0.00478653	0.0127907	0.00180887	0.027121	0.0367166	0.0261452	0.12523	0.056094	0.0721022	0.0669377	0.0382732	0.0383414	0.0116694	0.0051336	0.0056503	0.0714743	0.0284621	0.032025	0.0567066	0.0315072	0.0279836	0.0143964	0.0145878
	Membrane	glycolipids	MGDG	glycolipids	MGDG (16:0/18:3)	0.00190143	0.00234357	0.00374869	0.00237599	0.00262632	0.00327269	0.013039	0.00203161	0.0100912	0.000931818	0.00143679	0.0013845	0.00172892	0.00368054	0.000831088	0.000535548	0.00058818	0.00232033	0.000476103	0.000689829	0.00114222	0.000444915	0.000843159	0.00136295	0.000344967	0.000552009	0.000481887	0.0287651	0.0015467	0.00623105	0.00066333	0.00128071	0.00135571	0.00125366	0.000635605	0.000305867	0.00389626	0.000424206	0.000923454	0.00102618	0.000951348	0.000475687	0.000239943	0.000373054
	Membrane	glycolipids	MGDG	glycolipids	MGDG (16:0/18:4)	0.198542	0.176701	0.15462	0.153873	0.146027	0.175757	0.56734	0.209712	0.363427	0.21346	0.192791	0.175336	0.235333	0.315317	0.101148	0.109126	0.127297	0.113894	0.00350838	0.00622765	0.00719654	0.00841063	0.0439765	0.00713352	0.184614	0.248051	0.198873	0.793472	0.314202	0.418099	0.528526	0.268007	0.304146	0.14342	0.0843566	0.0715878	0.754073	0.235208	0.286746	0.478764	0.266682	0.182039	0.135278	0.120973
	Membrane	glycolipids	MGDG	glycolipids	MGDG (16:0/DHA)	0.0118596	0.0105206	0.0101582	0.019368	0.0170657	0.0189426	0.0706473	0.0256219	0.0598969	0.00887844	0.00807366	0.00647584	0.0100807	0.0136376	0.00837073	0.00803675	0.00856611	0.00654731	0.00519727	0.00809219	0.00660517	0.00696945	0.00509119	0.0123608	0.0117608	0.0141879	0.0100838	0.0925124	0.0624815	0.053937	0.0345897	0.0156374	0.0200138	0.0150295	0.010771	0.0116009	0.0413926	0.0134646	0.0183777	0.0533009	0.0409359	0.0248122	0.0155394	0.0131634
	Membrane	glycolipids	MGDG	glycolipids	MGDG (16:1/18:5)	0.0155371	0.0108467	0.00958037	0.0102131	0.0139597	0.0127308	0.113727	0.0220928	0.0973097	0.000947145	0.000852942	0.000789918	0.00772022	0.0095652	0.00507193	0.00904894	0.00674062	0.00641049	0.000593835	0.00126994	0.000822861	0.000917387	0.00347415	0.00108559	0.00957658	0.0134314	0.00860331	0.0478826	0.015211	0.0332315	0.0310198	0.0184458	0.0204024	0.00578153	0.00319558	0.00269393	0.0394213	0.00964351	0.0126926	0.164854	0.109899	0.0768902	0.0359742	0.0368639
	Membrane	glycolipids	MGDG	glycolipids	MGDG (16:1/DHA )	0.00130431	0.00149584	0.000878419	0.0023859	0.00189347	0.00275154	0.0231913	0.0098601	0.0202261	0.00132664	0.000998069	0.00222533	0.00137299	0.00238113	0.00119269	0.0027242	0.00261218	0.00184732	0.0110222	0.0132404	0.0178455	0.0234245	0.0278853	0.0314462	0.00228059	0.00380053	0.00196906	0.148187	0.0585998	0.0979295	0.00691609	0.00214818	0.00324525	0.00401377	0.00493452	0.0044328	0.0130156	0.00368681	0.0045775	0.0430204	0.0279904	0.0233655	0.00751617	0.00738916
	Membrane	glycolipids	MGDG	glycolipids	MGDG (18:1/18:1)	0.000551483	0.000479514	0.00144047	0.00107081	0.0010169	0.00222048	0.00279916	0.000740974	0.00186417	0.00774377	0.00574655	0.00300512	0.00424781	0.00552379	0.00422047	0.000361445	0.000196479	0.000258905	0.000496387	0.000283285	9.33672e-05	2.66568e-05	0.000419062	0.000149183	0.00065127	0.000931728	0.000454717	0.048489	0.000686422	0.00102647	0.00278746	0.00167842	0.00119857	0.00898407	0.00672729	0.00258477	0.0218797	0.00913051	0.00991828	0.00814938	0.00421832	0.00155771	0.00218276	0.00301105
	Membrane	glycolipids	MGDG	glycolipids	MGDG (18:3/18:3)	0.00689202	0.00499046	0.00538892	0.00283311	0.0022321	0.00264696	0.0251033	0.00898695	0.0185834	0.00483134	0.00546678	0.00286315	0.00886374	0.00731291	0.0033758	0.000329762	0.000679683	0.000417523	0.00221801	0.00356466	0.0041643	0.00408892	0.00756917	0.00704067	0.00329542	0.00356732	0.00371187	0.0494335	0.0180805	0.0461255	0.00373359	0.00220953	0.00204885	0.00595474	0.0018052	0.00491759	0.00956725	0.00704853	0.00982501	0.0313121	0.0182142	0.010503	0.00690931	0.00638403
	Membrane	glycolipids	MGDG	glycolipids	MGDG (18:3/18:4)	0.0480591	0.0319292	0.0392985	0.049494	0.0709881	0.0558403	0.26153	0.0375331	0.174022	0.00879655	0.00806828	0.00563972	0.0193316	0.0216881	0.0062953	0.0159187	0.0138145	0.012304	0.00230752	0.00567157	0.00226322	0.000663563	0.00376609	0.00651573	0.012783	0.014168	0.00890885	0.0523247	0.0161163	0.0364502	0.0703359	0.0414137	0.0664998	0.0695887	0.0400008	0.0310002	0.164445	0.0278868	0.0265049	0.126546	0.054259	0.0266467	0.0258776	0.0286239
	Membrane	glycolipids	MGDG	glycolipids	MGDG (18:3/DHA)	0.00254294	0.0022359	0.00217726	0.00179254	0.00186868	0.00153629	0.0117119	0.00330595	0.0107608	0.000542409	0.000561666	0.000668518	0.00239232	0.00195466	0.000934021	0.00372937	0.00280861	0.00461371	0.000152184	0.000289678	0.000316294	8.85722e-05	0.000432029	0.000754316	0.00594912	0.00719032	0.00454939	0.0236267	0.005586	0.0077881	0.0131857	0.00787216	0.0117685	0.00642361	0.00397454	0.00281484	0.0364104	0.00540278	0.00674798	0.0583605	0.0313819	0.0181098	0.0120578	0.0127823
	Membrane	glycolipids	MGDG	glycolipids	MGDG (18:4/18:4)	0.893896	0.69223	0.837189	0.940964	1.24432	1.00069	4.67809	0.565779	2.9027	0.131395	0.137713	0.117676	0.324569	0.402541	0.106316	0.293985	0.258457	0.237269	0.0415265	0.106386	0.0377243	0.0244428	0.0706181	0.106954	0.255102	0.294435	0.194619	0.603707	0.336574	0.561809	1.16354	0.714355	1.04779	1.06279	0.524489	0.432589	2.49013	0.365386	0.424009	2.30878	1.06764	0.491633	0.44132	0.464164
	Membrane	glycolipids	MGDG	glycolipids	MGDG (18:4/18:5)	4.46	3.68993	4.13207	4.70106	5.46391	5.09841	17.2644	2.43076	11.3098	0.507613	0.550404	0.488055	1.53526	1.845	0.444735	1.40284	1.33617	1.14314	0.150772	0.433676	0.143881	0.084321	0.276061	0.375906	1.05698	1.36868	0.846887	2.22948	1.32813	2.31537	2.70632	1.5626	2.58538	2.19774	1.1172	0.945384	4.74396	0.893047	1.27118	5.82436	3.63475	1.94408	1.30113	1.23462
	Membrane	glycolipids	MGDG	glycolipids	MGDG (18:4/DHA)	0.0216543	0.0132213	0.0180943	0.0103588	0.0133641	0.0105094	0.0868576	0.0301025	0.0909478	0.0055511	0.00623539	0.00555713	0.0197181	0.0243614	0.00745103	0.0257203	0.0251538	0.0393308	0.000800275	0.00284335	0.00278674	0.00101033	0.00417382	0.0027044	0.046545	0.0618314	0.0423813	0.0932768	0.0563528	0.0941746	0.111181	0.0790734	0.101419	0.0620048	0.0300368	0.0282785	0.342636	0.0479657	0.0595655	0.629281	0.334308	0.171142	0.110766	0.121274
	Membrane	glycolipids	MGDG	glycolipids	MGDG (18:5/18:5)	0.0308502	0.0226266	0.0329466	0.032953	0.0366925	0.0393996	0.144702	0.0149765	0.0967987	0.00313633	0.00259661	0.00326942	0.00707403	0.0100607	0.00279272	0.0125955	0.0112495	0.00913285	0.00132171	0.00494371	0.0018659	0.000687641	0.0016444	0.00342928	0.00915773	0.0104966	0.0117964	0.0996922	0.00815106	0.0141395	1.73732	1.134	0.973224	0.315709	0.145193	0.114679	1.01222	0.181108	0.342784	2.23907	1.61918	0.73764	0.436127	0.457867
	Membrane	glycolipids	MGDG	glycolipids	MGDG (18:5/DHA)	0.00654496	0.00492137	0.00566944	0.00306756	0.00495118	0.00524387	0.0350477	0.00510712	0.0269625	0.00267696	0.00246881	0.00158883	0.00661859	0.00900115	0.0034272	0.00178268	0.00118112	0.0012713	0.000165098	0.000319842	0.000676965	0.000120078	0.000986959	0.000335992	0.00611279	0.00737922	0.00538563	0.0273701	0.00292106	0.00656698	0.0207995	0.00976358	0.0130607	0.00717962	0.00358145	0.00211984	0.0446071	0.00650011	0.0120419	0.158674	0.10717	0.0662372	0.0318447	0.0335658
	Membrane	glycolipids	MGDG	glycolipids	MGDG (DHA/DHA)	0.00183946	0.00188094	0.00190895	0.00139752	0.00249221	0.0013882	0.014652	0.0039801	0.0102387	0.00372924	0.00478203	0.0033592	0.00163476	0.00177537	0.00100963	0.00134649	0.00103877	0.0010821	0.000159792	0.000224358	0.000295011	0.00029815	0.00121084	0.000577807	0.00552967	0.00610563	0.00401736	0.0227804	0.00488027	0.00672291	0.00704793	0.00282165	0.00206091	0.00341867	0.0014922	0.0013341	0.0122077	0.00108487	0.00511691	0.114724	0.0851481	0.0534766	0.0246561	0.0256394
	Membrane	phospholipids	PC	PC	PC (14:0/DHA)	0.00327445	0.0041031	0.00468951	0.0056769	0.00692544	0.00679215	0.0215715	0.00371727	0.0131927	0.000299265	0.00106707	0.000575819	0.00428334	0.0018475	0.00124756	0.00226926	0.00224202	0.00259272	6.53459e-05	0.000478548	0.000165519	0.000542892	0.000369083	0.000480727	0.00195403	0.00236966	0.00153185	0.00264692	1.19723e-05	0.00105547	0.0193295	0.0167255	0.0158442	0.00231777	0.000862999	0.00103427	0.00515641	0.00461328	0.0187661	0.00942801	0.00769095	0.0027644	0.00269188	0.00211427
	Membrane	phospholipids	PC	PC	PC (16:0/16:1)	0.00433643	0.00451341	0.00468951	0.00690434	0.00692544	0.00910766	0.0116486	0.00874652	0.0164909	0.00117212	0.00111789	0.00463647	0.00293715	0.00197492	0.00299414	0.00123416	0.00117706	0.00196591	0.0011287	0.00246751	0.00205244	0.0035288	0.00506801	0.00206026	0.00081714	0.000868874	0.000967483	0.00313219	0.0010604	0.00293186	0.0338266	0.028837	0.0253507	0.011886	0.00683207	0.00588741	0.0169425	0.0236091	0.0576884	0.0209511	0.0199395	0.00879583	0.00689794	0.00658677
	Membrane	phospholipids	PC	PC	PC (16:0/18:1)	0.00433643	0.00574434	0.002958	0.00935922	0.00827675	0.00879893	0.0118643	0.0109331	0.0133989	0.00109731	0.00134654	0.0104694	0.000581311	0.000331277	0.00349316	0.00398115	0.00459613	0.00262121	0.0077227	0.00620617	0.00529661	0.00995302	0.0132209	0.0119495	0.000586209	0.000842545	0.000886859	0.00388216	0.00225763	0.00674327	0.0105433	0.00922785	0.00760521	0.0083202	0.00568141	0.00564873	0.00662967	0.00569875	0.0111207	0.00698371	0.0062667	0.00427226	0.00311249	0.00235823
	Membrane	phospholipids	PC	PC	PC (16:0/18:4)	0.0150448	0.0139505	0.0198402	0.0148827	0.0168913	0.0169804	0.0409858	0.00801764	0.0247363	0.00274326	0.00330285	0.00201911	0.00550715	0.00331277	0.0474071	0.00398115	0.00470824	0.00484354	0.00142573	0.00351434	0.000728285	0.000814338	0.00148735	0.00302171	0.00248695	0.00289625	0.00233808	0.00617616	0.000786749	0.00120206	0.11422	0.0922785	0.0823897	0.0303093	0.0179791	0.0143207	0.0270098	0.0298506	0.0903553	0.048886	0.039879	0.0183456	0.0134594	0.0130109
	Membrane	phospholipids	PC	PC	PC (16:0/DHA)	0.216822	0.201052	0.24169	0.214802	0.202696	0.216114	0.711858	0.123909	0.391659	0.0349143	0.0355691	0.0388865	0.097905	0.0764485	0.0424169	0.0318492	0.0347513	0.0455862	0.0077227	0.0164501	0.00728285	0.00814338	0.0214839	0.0131857	0.0346396	0.0434437	0.0322494	0.0233812	0.00991987	0.017298	0.483237	0.346044	0.401386	0.160461	0.0862999	0.0739904	0.152237	0.15468	0.625537	0.307283	0.313335	0.133194	0.100945	0.0739996
	Membrane	phospholipids	PC	PC	PC (18:1/18:1)	0.0207972	0.0205155	0.0122649	0.0782492	0.0405392	0.0957076	0.2114	0.102043	0.107191	0.000972611	0.000914634	0.000972163	0.0134619	0.00828192	0.0127251	0.0437927	0.0442798	0.0427371	0.0594054	0.0740254	0.0662077	0.108578	0.115683	0.127736	0.00488508	0.00579249	0.00403118	0.0423508	0.0236025	0.0527735	0.0219653	0.0175906	0.0137316	0.0463554	0.0431499	0.0469401	0.019889	0.0192672	0.0354471	0.00558697	0.00096849	0.00080419	0.000269188	0.00146373
	Membrane	phospholipids	PC	PC	PC (18:1/19:1)	0.752238	0.656496	0.757537	1.10469	1.23307	0.910766	3.02	0.699721	2.47363	0.219461	0.200711	0.179476	0.52012	0.458691	0.299414	0.234888	0.224202	0.313405	0.0386135	0.0972051	0.0470075	0.0380025	0.104665	0.0851573	0.328633	0.30279	0.209621	0.0926423	0.0684129	0.114342	0.658959	0.432556	0.580953	0.243663	0.1726	0.151163	0.319207	0.407054	1.11207	0.663452	0.62667	0.326702	0.260776	0.243955
	Membrane	phospholipids	PC	PC	PC (18:4/DHA)	0.0261071	0.0221567	0.0288585	0.0230145	0.0202696	0.0246987	0.0711858	0.00692432	0.0371045	0.0039902	0.00223577	0.00201911	0.0097905	0.00471432	0.00274462	0.00437927	0.00465218	0.00598319	0.000469302	0.00171978	0.000489937	0.000248826	0.00121191	0.00164821	0.00213167	0.00263295	0.00193497	0.001147	0.000328382	0.000732965	0.0483237	0.0374881	0.0316884	0.0112917	0.00575333	0.00453489	0.00761185	0.00569875	0.0347521	0.0174593	0.0153819	0.00653405	0.00529964	0.00504173
	Membrane	phospholipids	PC	PC	PC (DHA/DHA)	0.221247	0.18464	0.238083	0.15343	0.185805	0.169804	0.668715	0.06487	0.371045	0.0274326	0.023628	0.024678	0.0826073	0.0407725	0.0249511	0.0330436	0.0364328	0.0455862	0.00475243	0.0149546	0.00582628	0.00167392	0.0115683	0.00933984	0.0266459	0.0315954	0.0177372	0.00485269	0.00410478	0.00586372	0.303121	0.21051	0.19013	0.101031	0.0431499	0.0302326	0.056475	0.0461328	0.361421	0.247922	0.242123	0.0829321	0.0706618	0.0561096
	Membrane	phospholipids	PC	PC	PC (EPA/DHA)	0.0110623	0.0082062	0.00937903	0.0087455	0.0101348	0.00879893	0.0474572	0.00400882	0.0288591	0.0019951	0.00139736	0.00119651	0.00581311	0.00242087	0.00194619	0.00020702	0.000190571	0.000239328	0.000136632	0.000127114	0.000119174	1.22151e-05	0.00165261	0.000192291	0.000248695	0.00025013	0.000217684	0.000882308	3.42065e-05	8.2092e-05	0.00219653	0.00222045	0.00158442	0.00089145	0.000618483	0.00029437	0.00056475	0.000515601	0.00423975	0.00272365	0.00264911	0.00150786	0.0008328	0.0008945
	Membrane	phospholipids	PE	Other ML	PE (14:0/16:1)	0.0263898	0.0760734	0.0363266	0.111964	0.0263736	0.329388	0.362875	0.183908	0.128983	0.00856986	0.0112092	0.00924385	0.0164572	0.0239234	0.0238417	0.0193989	0.0107902	0.00915159	0.0141767	0.0123993	0.00719836	0.0290023	0.0539265	0.0373993	0.00454409	0.00509413	0.00328917	0.120216	0.0400194	0.0466663	0.0379616	0.016663	0.00768443	0.0147228	0.0125	0.021322	0.0285774	0.0589965	0.0143533	0.0319059	0.0186161	0.0242507	0.00885588	0.00746355
	Membrane	phospholipids	PE	Other ML	PE (16:0/16:1)	0.0140986	0.0397923	0.0203874	0.108352	0.0253968	0.188221	0.251221	0.167189	0.0900832	0.00925545	0.0091712	0.00924385	0.0124676	0.0177497	0.0166442	0.0502088	0.0298805	0.0223407	0.0458015	0.0371978	0.0261759	0.0966744	0.215706	0.0546605	0.0131274	0.0139535	0.00775304	0.480866	0.127334	0.233331	0.062833	0.0265643	0.012167	0.0331263	0.03125	0.0473821	0.0418205	0.0936249	0.0194191	0.0448676	0.0243043	0.035958	0.0119451	0.00929136
	Membrane	phospholipids	PE	Other ML	PE (16:0/18:1)	0.0115681	0.0403774	0.0229821	0.119187	0.039072	0.270568	0.398764	0.250784	0.116699	0.00548471	0.0064538	0.00591607	0.0129663	0.013891	0.0161943	0.0467855	0.0232404	0.0296081	0.0654308	0.049597	0.034683	0.154679	0.350522	0.123705	0.00387089	0.00287929	0.00199699	0.360649	0.0970167	0.271248	0.0392706	0.0123162	0.00768443	0.0282187	0.0275	0.0367212	0.0285774	0.0641266	0.0126646	0.00907323	0.00408519	0.00535189	0.00226546	0.00167549
	Membrane	phospholipids	PE	Other ML	PE (16:1/16:1)	0.00723007	0.0198961	0.00963766	0.0433409	0.0107448	0.0941107	0.127604	0.0785789	0.0470889	0.0061703	0.00679348	0.00730264	0.00598444	0.0100324	0.00899685	0.0136933	0.00830013	0.00861326	0.0119956	0.0103327	0.00719836	0.037703	0.0943714	0.0189873	0.00302939	0.00265781	0.00152711	0.320577	0.066699	0.163332	0.0222533	0.0115917	0.00499488	0.012269	0.01125	0.0165837	0.0230013	0.0371934	0.00759878	0.00997059	0.00465401	0.00702435	0.00247141	0.00198013
	Membrane	phospholipids	PE	Other ML	PE (16:1/18:1)	0.00903759	0.0333553	0.0129738	0.101129	0.0234432	0.207828	0.21932	0.183908	0.0839411	0.00925545	0.00543478	0.0110926	0.0159585	0.00848896	0.0166442	0.0410799	0.0224104	0.0199182	0.0359869	0.0309981	0.0235583	0.106342	0.296596	0.0834292	0.00403919	0.00376523	0.00305423	0.591064	0.218288	0.320831	0.0379616	0.0118332	0.00960553	0.0214707	0.021875	0.0307984	0.0250923	0.057714	0.00970956	0.00867441	0.00480915	0.00627174	0.00267736	0.00167549
	Membrane	phospholipids	PE	Other ML	PE (18:1/18:1)	0.0155447	0.0579329	0.0344732	0.137246	0.034188	0.290175	0.478517	0.334378	0.133077	0.0154258	0.0203804	0.0184877	0.0314183	0.0393579	0.040036	0.0684666	0.0373506	0.0430663	0.0806979	0.072329	0.0464622	0.232019	0.593192	0.158228	0.00774179	0.006866	0.00375905	1.30234	0.297114	0.729161	0.0602149	0.0193195	0.0102459	0.0337397	0.03125	0.0390903	0.0418205	0.0859297	0.0168862	0.0109676	0.00351637	0.00836232	0.00288331	0.00198013
	Membrane	phospholipids	PG	Other ML	PG (16:0/16:1)	0.0253822	0.0409626	0.0189046	0.096313	0.04662	0.160542	0.204098	0.137799	0.09843	0.0160256	0.0192708	0.0166389	0.0203471	0.0266796	0.0216963	0.0510304	0.042557	0.0178658	0.0368518	0.0346646	0.0250852	0.0908739	0.223738	0.102634	0.00846307	0.0100971	0.0055211	0.676843	0.166852	0.223432	0.0299352	0.0114773	0.00902251	0.026405	0.0266667	0.047619	0.0306684	0.0601001	0.0147754	0.0243986	0.0134449	0.0170287	0.00680925	0.00406383
	Membrane	phospholipids	PG	Other ML	PG (16:0/18:1)	0.0571099	0.133129	0.0611621	0.280913	0.133644	0.381287	0.720348	0.586922	0.29529	0.0188537	0.0234375	0.0268783	0.0436864	0.0436575	0.0479947	0.14524	0.131293	0.0847868	0.178994	0.165323	0.119973	0.483372	1.29079	0.453301	0.0166617	0.0198684	0.0118787	1.5841	0.254251	0.593493	0.100691	0.0237744	0.0275263	0.0768146	0.0666667	0.113717	0.105423	0.193871	0.0413712	0.0304983	0.0142852	0.0182451	0.00828952	0.00477058
	Membrane	phospholipids	PG	Other ML	PG (16:1/18:1)	0.0329968	0.0573477	0.0244648	0.104339	0.040404	0.170576	0.288139	0.224561	0.137802	0.00565611	0.0078125	0.00678357	0.0131658	0.0181906	0.0157791	0.0392542	0.0452735	0.017563	0.0315873	0.0346646	0.0381731	0.141145	0.430265	0.0940814	0.00608283	0.00683995	0.00401535	0.489631	0.0873987	0.192012	0.0299352	0.00983768	0.00718742	0.0232844	0.02	0.0376688	0.0373771	0.0833646	0.0187155	0.0396477	0.021848	0.0255431	0.0121382	0.00565402
	Membrane	phospholipids	PG	Other ML	PG (16:1/19:2)	0.0266513	0.030722	0.0205727	0.0345122	0.0198912	0.0371253	0.102049	0.0510367	0.0551208	0.00895551	0.0114583	0.0111353	0.0227409	0.0230415	0.0118343	0.0329735	0.0335024	0.0157461	0.00789681	0.0117326	0.00349012	0.00734725	0.0167803	0.0213821	0.0449601	0.0521139	0.0368073	0.230415	0.0794534	0.0872783	0.11702	0.0300596	0.0412895	0.0204039	0.0122667	0.0255864	0.0757126	0.193871	0.0768322	0.259235	0.142852	0.158124	0.0651319	0.0406383
	Membrane	phospholipids	PG	Other ML	PG (16:2/20:2)	0.0698009	0.0870456	0.0611621	0.14447	0.0745921	0.190643	0.324156	0.148006	0.157488	0.032994	0.0395833	0.030718	0.0777977	0.075188	0.0420776	0.0341511	0.0294277	0.0142321	0.0107923	0.0146658	0.00370825	0.008314	0.0473291	0.023948	0.0396706	0.0521139	0.0368073	0.216014	0.0873987	0.0837872	0.0734774	0.0174892	0.0168216	0.0120023	0.00693333	0.0120824	0.0431274	0.0891807	0.037431	0.198239	0.117643	0.121634	0.0503292	0.0318039
	Membrane	phospholipids	PG	Other ML	PG (18:0/18:1)	0.0126911	0.0348182	0.0150125	0.096313	0.0285936	0.120406	0.174084	0.132695	0.0748068	0.00612745	0.00833333	0.00486369	0.0101735	0.0112782	0.0138067	0.0380765	0.0298805	0.0145349	0.0421163	0.0399976	0.0250852	0.0850735	0.253856	0.0940814	0.00449601	0.00423425	0.00234229	0.331221	0.103289	0.139645	0.0326566	0.00929114	0.00810497	0.0288055	0.0226667	0.0298507	0.0239597	0.0620388	0.0177305	0.0129618	0.00806696	0.00741966	0.00414476	0.00176688
	Membrane	phospholipids	PG	Other ML	PG (18:1/18:1)	0.139602	0.399386	0.161245	0.802608	0.251748	1.00339	2.16104	1.5311	0.78744	0.0659879	0.0885417	0.078075	0.125673	0.145525	0.144642	0.392542	0.389352	0.214995	0.500132	0.559966	0.359918	1.17943	3.44212	1.11187	0.0476048	0.0586281	0.0334612	4.17627	1.27125	2.02486	0.380994	0.139367	0.102459	0.312059	0.253333	0.433547	0.325852	0.659162	0.177305	0.121993	0.0529394	0.0754129	0.0296054	0.0167854
	Membrane	phospholipids	PG	Other ML	PG (18:1/19:1)	0.0329968	0.0563236	0.0250209	0.264861	0.0839161	0.351185	0.840405	0.61244	0.314976	0.0287519	0.0348958	0.0268783	0.0496709	0.0533592	0.0631164	0.109912	0.0814922	0.0333091	0.105291	0.135992	0.0992502	0.328693	0.86053	0.248033	0.0238024	0.0254055	0.016396	1.16647	0.309868	0.453847	0.127905	0.0300596	0.0244678	0.127224	0.0933333	0.142146	0.17251	0.348968	0.0945626	0.0869201	0.0504185	0.0498699	0.0254607	0.0123682
	Membrane	cardiolipin	CL	CL	CL (18:1/18:1/DHA/DHA)	0.0291799	0.0391049	0.026733	0.0287533	0.0237129	0.0397813	0.102255	0.110697	0.0506016	0.00902872	0.00748786	0.0045455	0.0160698	0.0357247	0.0141992	0.00255303	0.00404151	0.00305155	0.000438306	0.00172474	0.000341555	0.000663238	0.00469966	0.000759389	0.0115924	0.0165289	0.00798087	0.0136664	0.027809	0.0154544	0.038875	0.0155707	0.0107579	0.0102813	0.00543927	0.00595353	0.0199452	0.0366924	0.0667554	0.0456329	0.051262	0.0429759	0.0245826	0.0188791
	Membrane	aminolipids	DGCC-OH	Oxy linked to ML	DGCC (16:0/DHA-OH)	0.00327521	0.00432706	0.0050206	0.00599266	0.00627718	0.00678775	0.0162734	0.00357054	0.00905496	0.000892997	0.00233417	0.00025817	0.0023757	0.00102918	0.00375188	0.000583097	0.000586687	0.00093521	0.000199889	0.000333578	0.000183247	0.00362266	0.00184976	0.00171441	0.000819864	0.000699444	0.000757958	0.00553231	0.00422008	0.00766818	0.00103032	0.0010447	0.000755567	0.000479469	0.000380695	0.000297126	0.000158384	0.000504069	0.000521287	0.0016282	0.00175578	0.00249055	0.00102882	0.00127242
	Membrane	aminolipids	DGCC-OH	Oxy linked to ML	DGCC (16:0/DHA-OOH)	0.00167196	0.00166162	0.0023119	0.00151557	0.00247248	0.00195784	0.00708215	0.00159928	0.00305562	0.00125567	0.00267358	0.000318808	0.00327199	0.000966566	0.00448221	0.000804407	0.000953274	0.00126969	0.000229903	0.000703007	0.000289956	0.00173447	0.000677001	0.000762439	0.00199506	0.00144081	0.00179096	0.00322569	0.00340254	0.00385675	0.000921583	0.00095065	0.000387905	0.000366431	0.000338046	0.000300813	0.000212223	0.000427657	0.000703008	0.00105944	0.000985217	0.00105421	0.000667383	0.000654476
	Membrane	aminolipids	DGCC-OH	Oxy linked to ML	DGCC (18:4/18:4-OH)	0.000526963	0.000757751	0.000701647	0.00111274	0.00137846	0.00130967	0.00325179	0.000984329	0.00189047	0.000418926	0.00104206	0.000107028	0.000976992	0.000513768	0.00112251	0.000484946	0.000438425	0.000708593	0.000323406	0.000561767	0.000221483	0.00169008	0.00122639	0.00159978	0.000519693	0.000483425	0.000490554	0.0126572	0.0077977	0.0109353	0.00105392	0.00138772	0.00111798	0.000865065	0.000558316	0.000548361	0.000222901	0.000306005	0.00103171	0.000943632	0.00100099	0.00116624	0.000635733	0.000722502
	Membrane	glycolipids	DGDG-OH	Oxy linked to ML	DGDG (18:4/18:4-OH)	0.00138721	0.00364105	0.00210519	0.00932338	0.00521435	0.00940206	0.0193394	0.0108754	0.0392248	0.00553318	0.0278927	0.000856712	0.00655393	0.00461709	0.0167309	0.00197172	0.00138664	0.00568979	0.00150344	0.00304105	0.000719894	0.000838593	0.98878	0.0138736	0.00617326	0.00705254	0.0160745	1.32856	0.0200819	0.037591	0.00515186	0.00239484	0.00146625	0.00325575	0.000806471	0.00241487	0.00186357	0.00170717	0.00895714	0.00629194	0.00912406	0.011753	0.00570332	0.0104062
	Membrane	glycolipids	DGDG-OH	Oxy linked to ML	DGDG (18:4/18:5-OH)	0.00984092	0.0256767	0.0165082	0.0579588	0.0341628	0.0609322	0.108183	0.0562915	0.192674	0.0281617	0.15905	0.00567577	0.0425092	0.0271149	0.104711	0.00807509	0.00593859	0.0219063	0.00550947	0.0116448	0.00208317	0.00178949	1.34029	0.0212864	0.0207417	0.0263347	0.0585936	3.30172	0.0578625	0.112994	0.0182381	0.00837673	0.0043699	0.00490602	0.00127698	0.00435977	0.0053344	0.00801121	0.0291366	0.0185773	0.0241706	0.0199461	0.0140207	0.0230388
	Membrane	glycolipids	DGDG-OH	Oxy linked to ML	DGDG (18:5/18:4-OH)	0.00578607	0.0150662	0.00993885	0.0350502	0.0212889	0.0359938	0.0641875	0.0318035	0.111248	0.0162087	0.0883921	0.00316207	0.0239065	0.0148615	0.0589317	0.00473617	0.0035579	0.0129163	0.00325251	0.0066283	0.00123516	0.000918167	0.732128	0.00949036	0.0112174	0.0141379	0.0347913	1.94373	0.03023	0.0562853	0.00914321	0.00390673	0.00223778	0.00316889	0.000703038	0.0022179	0.00303771	0.00460978	0.0169867	0.00846733	0.0106623	0.00981461	0.00682449	0.0101518
	Membrane	glycolipids	DGDG-OH	Oxy linked to ML	DGDG (DHA/DHA-OH)	0.00136189	0.00266266	0.00209596	0.0010278	0.000619938	0.00106489	0.0151988	0.00562607	0.0252913	0.00172074	0.0073724	0.000274359	0.00291449	0.000939446	0.00616667	0.0012591	0.000740912	0.0033106	2.61189e-05	0.000217993	0.00012108	0.000418	0.230856	0.00391681	0.00448549	0.0051943	0.00943819	0.523447	0.00674054	0.0139768	0.00180279	0.000640411	0.00039088	0.000148724	3.02985e-05	6.03919e-05	0.000135673	0.000550652	0.000227157	0.00275038	0.0029945	0.00326172	0.00206578	0.0053276
	Membrane	glycolipids	MGDG-OH	Oxy linked to ML	MGDG (18:4/18:5-OH)	0.0167108	0.0349661	0.0230509	0.05249	0.0307138	0.0498357	0.148455	0.0797838	0.234971	0.0148645	0.090357	0.00305439	0.0284585	0.0208265	0.0625936	0.00901522	0.00593018	0.019841	0.0024377	0.00488944	0.00123929	0.00207102	1.59812	0.0283205	0.0248284	0.0329667	0.0729382	4.31386	0.0645568	0.150047	0.0144665	0.00598595	0.00400648	0.0070731	0.0014849	0.00431366	0.0043154	0.00639916	0.0123909	0.0325077	0.031987	0.026853	0.0279629	0.0407498
	Membrane	glycolipids	MGDG-OH	Oxy linked to ML	MGDG (18:5/18:5-OH)	0.00113413	0.00229719	0.00170531	0.00161914	0.000541303	0.00194529	0.00481065	0.00661053	0.00690558	0.00106364	0.00778909	0.000197516	0.00211809	0.00163869	0.00518317	0.00115346	0.000466367	0.00200298	0.00029743	0.000486778	0.000126326	0.000861469	0.345724	0.00803082	0.00367323	0.00443281	0.0114875	0.722368	0.00825906	0.0161241	0.0123905	0.00469474	0.00241209	0.00145619	0.000226267	0.00115406	0.000180145	0.000436019	0.00106391	0.0252201	0.0298247	0.0143283	0.0128972	0.0158859
	Membrane	phospholipids	PC-OH	Oxy linked to ML	PC (DHA/DHA-OH)	0.0389602	0.0455535	0.0294713	0.0565441	0.038316	0.0545229	0.157573	0.022871	0.0705424	0.00540498	0.00455839	0.00297078	0.0171414	0.00770407	0.00482776	0.00717077	0.00665779	0.00612858	0.000978245	0.00321267	0.000979244	0.0289638	0.0140904	0.0167828	0.00642542	0.0103627	0.00627972	0.049862	0.00806545	0.0154019	0.0191478	0.0115128	0.00989234	0.00646797	0.00340531	0.00269681	0.000472919	0.00249684	0.00381941	0.0310473	0.0208998	0.0137453	0.00805764	0.0104585
	Membrane	aminolipids	L-DGCC	Lyso	LysoDGCC (16:0)	0.00958204	0.0166162	0.0153885	0.00916477	0.0183431	0.00710749	0.0317803	0.00640685	0.0232596	0.00633302	0.0182484	0.00231292	0.00717409	0.00367532	0.014186	0.000797524	0.00126162	0.00337485	0.00108578	0.00206045	0.00119889	0.0120149	0.0108847	0.00996698	0.00326529	0.00300165	0.00223414	0.00953966	0.00907988	0.0143651	0.00663705	0.0159592	0.00870756	0.00520592	0.00425828	0.00357459	0.00327849	0.00239605	0.00401625	0.0201535	0.0130291	0.0135687	0.0111313	0.015812
	Membrane	aminolipids	L-DGCC	Lyso	LysoDGCC (18:0)	0.0012726	0.00251651	0.00168385	0.00147604	0.00177433	0.0010869	0.00450097	0.00190355	0.00441427	0.001076	0.00304481	0.000329483	0.00103772	0.000315678	0.00272379	0.000124065	0.000212033	0.000820434	0.000252905	0.000436353	0.000280507	0.000777099	0.000996404	0.00130431	0.00199701	0.00143132	0.00105588	0.00403564	0.00224962	0.00425709	0.000280694	0.000712153	0.000478305	0.000272875	0.000251864	0.000230348	0.00182847	0.0010929	0.000703405	0.00265002	0.00137247	0.00210798	0.00113287	0.00185311
	Membrane	aminolipids	L-DGCC	Lyso	LysoDGCC (DHA)	0.0104328	0.00922968	0.013632	0.00445813	0.00722322	0.0042961	0.0259195	0.00341872	0.0175699	0.00325384	0.00464186	0.000581586	0.00504824	0.00138283	0.00766151	0.00206913	0.00314682	0.0055536	0.000372988	0.00147228	0.00253302	0.0653788	0.0216503	0.0177586	0.0013669	0.00155089	0.00132847	0.0095579	0.00966723	0.00867834	0.0583439	0.0895552	0.0380539	0.0934131	0.0517309	0.0256536	0.00113463	0.00109921	0.00136791	0.0339839	0.0281328	0.0107278	0.0213478	0.0160626
	Membrane	glycolipids	L-DGDG	Lyso	Lyso DGDG (18:4)	0.0128061	0.00912685	0.0216139	0.00705919	0.00753281	0.00977955	0.0126038	8.38233e-05	0.00899798	2.91363e-05	3.18265e-05	7.98753e-05	1.09037e-05	3.47563e-06	2.30457e-05	0.0675479	0.0960903	0.038418	0.0540528	0.125731	0.0498735	0.00126117	5.74112e-05	0.000581938	4.28638e-05	6.30603e-05	1.83333e-05	0.000172822	4.06099e-06	1.10749e-05	2.15279	1.3069	1.92528	0.0307806	0.0177418	0.017739	2.72786e-05	2.43047e-06	0.00524559	1.52959e-05	5.26205e-06	2.89094e-06	6.38655e-05	1.94945e-05
	Membrane	glycolipids	L-DGDG	Lyso	Lyso DGDG (18:5)	0.0400354	0.0219127	0.0601653	0.0103482	0.0121513	0.0176039	0.0242077	0.00138816	0.0164404	0.0133941	0.0064575	0.00495762	0.00277286	0.00697506	0.0016899	0.0558294	0.0628844	0.0143146	0.0118435	0.0419345	0.0419577	0.0281944	0.0133297	0.0669437	0.00476348	0.00724879	0.00380332	0.000631222	0.000726938	0.00018836	0.592097	0.325221	0.432997	0.00701127	0.00436845	0.00363474	0.00224251	0.00089704	0.00154718	0.00158699	0.0013854	0.000435381	0.00723018	0.00123566
	Membrane	glycolipids	L-DGDG	Lyso	Lyso DGDG (DHA)	3.55464e-05	4.2386e-05	3.05154e-05	4.22431e-05	3.98207e-05	1.05586e-05	9.65216e-05	1.12499e-05	2.13804e-05	4.23391e-05	1.16044e-05	6.2776e-05	3.07525e-05	5.74305e-05	1.30158e-05	0.00151309	0.00144977	0.000615633	0.000105455	0.000452104	0.00176974	0.00911442	0.00244172	0.015494	0.000158368	9.99911e-05	0.000355657	2.94447e-05	2.42488e-06	9.83244e-06	0.0926219	0.0701761	0.0833612	0.00236719	0.000803601	0.00066254	5.4329e-06	8.18224e-06	1.52332e-05	0.00245303	0.000379404	0.00103472	0.00237962	0.0146885
	Membrane	glycolipids	L-MGDG	Lyso	LysoMGDG (16:0)	0.00789616	0.00976317	0.0103238	0.00382237	0.0032246	0.00475366	0.0350931	0.0135063	0.0762513	0.0656256	0.245184	0.00712622	0.0552752	0.0393716	0.125875	0.00962966	0.00882673	0.0202931	0.00124113	0.00233752	0.00290983	0.0103143	5.24125	0.0605672	0.00726858	0.00975422	0.0261939	2.52771	0.0363002	0.037573	0.0994031	0.0446185	0.022743	0.0404059	0.0103934	0.0336442	0.00857819	0.0693739	0.00565095	0.0564261	0.0559718	0.032686	0.0341104	0.0401414
	Membrane	glycolipids	L-MGDG	Lyso	LysoMGDG (18:4)	0.00929	0.00957042	0.0140508	0.0132438	0.00846887	0.0154383	0.0547665	0.0290886	0.10091	0.00899667	0.0559471	0.00220546	0.0141325	0.00989802	0.0395471	0.0105748	0.00845524	0.0192573	0.0111278	0.0139477	0.00420459	0.00840229	4.27377	0.0434764	0.00807028	0.010078	0.0291765	1.76699	0.0721271	0.0889107	0.0392219	0.0149058	0.0108179	0.0665521	0.0164599	0.0454658	0.00966647	0.00763208	0.0374152	0.119644	0.104008	0.0727563	0.0888803	0.0890139
	Membrane	glycolipids	L-MGDG	Lyso	LysoMGDG (18:5)	0.0238512	0.0232439	0.0341898	0.0333006	0.0162268	0.0471099	0.118422	0.0205475	0.211508	0.0166628	0.0670531	0.00235043	0.0271313	0.01672	0.0468754	0.0196327	0.0140951	0.0245127	0.00360709	0.00796534	0.00893368	0.00827797	3.03091	0.0429682	0.00554108	0.00871021	0.019162	2.27839	0.0760725	0.0249493	0.0656614	0.0225145	0.0176775	0.0764521	0.0225681	0.0606423	0.00618074	0.00687687	0.0258576	0.143486	0.125433	0.0801438	0.0911894	0.0911184
	Membrane	phospholipids	L-PC	Lyso	LysoPC (14:0)	0.0236928	0.0152589	0.0196341	0.0573616	0.0292236	0.0639575	0.0925359	0.0108006	0.0676146	0.00500726	0.00857664	0.00420075	0.00167136	0.0158048	0.00401222	0.0222474	0.0435015	0.00257504	0.0297549	0.07204	0.012934	0.0249142	0.0102033	0.0116691	0.00198674	0.00139152	0.00133969	0.079198	0.0465258	0.0179033	0.022464	0.0148587	0.0163206	0.0402519	0.0556754	0.0673187	0.0596785	0.0404134	0.103769	0.00805928	0.00470411	0.00910281	0.00143107	0.00327705
	Membrane	phospholipids	L-PC	Lyso	LysoPC (16:0)	0.0122346	0.0113439	0.00774466	0.0359324	0.0247957	0.03075	0.0403071	0.0268429	0.0297301	0.00892237	0.00802259	0.00917646	0.0215143	0.0108544	0.0100117	0.00895692	0.0093148	0.00443463	0.00750826	0.00986344	0.00694698	0.00919344	0.0100409	0.00929944	0.00312605	0.00530827	0.00334388	1.12171	0.160633	0.142502	0.0101763	0.0072826	0.00797312	0.0171294	0.0162718	0.0205692	0.017171	0.0169366	0.0276424	0.00718847	0.00988535	0.00880804	0.00238271	0.00238385
	Membrane	phospholipids	L-PC	Lyso	LysoPC (18:0)	0.00404741	0.0308338	0.00133092	0.00712731	0.00480887	0.0109732	0.00332982	0.00507934	0.00341487	0.00131654	0.00130704	0.00174288	0.00112108	0.00266643	0.000961523	0.00784393	0.00288585	0.00117308	0.00178196	0.00198103	0.00354228	0.00300083	0.00308614	0.051613	0.000873537	0.000773982	0.000477966	1.04174	0.0150535	0.0306649	0.00125505	0.00284997	0.00190319	0.00638161	0.00455385	0.0263835	0.00161507	0.00133063	0.0258236	0.00176647	0.00328122	0.00335512	0.000673994	0.000883653
	Membrane	phospholipids	L-PC	Lyso	Lyso PC (18:1)	0.00719611	0.00585291	0.0036261	0.0296212	0.00950397	0.0234293	0.0359609	0.0177527	0.0174063	0.00233262	0.00336489	0.00183422	0.00164433	0.00113087	0.00253526	0.0186726	0.0255362	0.00364527	0.0122027	0.0245955	0.0127098	0.012561	0.00879787	0.0101167	0.000378332	0.0006436	0.000442837	0.0471434	0.0448392	0.0236978	0.0122714	0.00873391	0.00639463	0.0339932	0.0206002	0.0232383	0.0332051	0.0178578	0.0739094	0.00699428	0.00442225	0.00378482	0.00182619	0.00268209
	Membrane	phospholipids	L-PC	Lyso	LysoPC (DHA)	0.0384323	0.0239358	0.0236193	0.0309649	0.0305985	0.0459993	0.0814337	0.0129705	0.0387814	0.0118744	0.00846769	0.00631108	0.0218105	0.012139	0.0108712	0.0122871	0.0141668	0.00594558	0.00289312	0.00604664	0.00199379	0.180782	0.0546191	0.0602833	0.00356937	0.00519345	0.00278051	0.0171453	0.0126455	0.00776897	0.325312	0.203072	0.149416	0.478949	0.2241	0.2126	0.00124743	0.00291192	0.00775393	0.19023	0.139582	0.0567979	0.0498297	0.0543151
	Membrane	phospholipids	L-PE	Lyso	LysoPE (18:1)	0.0225163	0.0193161	0.0245496	0.0612758	0.0404321	0.0778049	0.12483	0.0294892	0.0966337	0.00247492	0.00213965	0.00163484	0.0054401	0.00476076	0.00281909	0.0293006	0.0337434	0.0197027	0.0428374	0.0595154	0.0417829	0.0281419	0.00604259	0.00488713	0.000520633	0.000593677	0.000659155	0.0847514	0.0990182	0.0586149	0.01701	0.0196064	0.0180587	0.0473989	0.0430395	0.0364097	0.0473153	0.0237164	0.141408	0.00598721	0.00618618	0.00206768	0.00127019	0.0017587
	Membrane	phospholipids	L-PG	Lyso	LysoPG (18:1)	0.00981482	0.0152288	0.0211128	0.0481889	0.0211281	0.036623	0.113672	0.0177555	0.0655634	0.00109896	0.000902583	0.000979158	0.00283363	0.00249604	0.000599293	0.0150062	0.0175662	0.0163376	0.0209475	0.0415511	0.0551247	0.0266621	0.00956233	0.00770648	0.00028322	0.000849598	0.000468172	0.173117	0.135473	0.0722883	0.0107082	0.0228581	0.0116545	0.024557	0.0197497	0.0123021	0.0629834	0.039749	0.0907996	0.00202451	0.00152139	0.000949749	0.000489188	0.000560164
	Others	Oxylipins	Oxylipins	Not used	FFA (18:2-OH)	0.00274954	0.00274201	0.00171501	0.00383208	0.00163858	0.00197518	0.00245432	0.00400743	0.00260193	0.00938624	0.00932023	0.00981443	0.00848021	0.011174	0.0361323	0.00406683	0.00689209	0.00213167	0.00282322	0.0117363	0.012651	0.00213464	0.0223738	0.0654199	0.019231	0.0114478	0.0127591	0.0575518	0.0126677	0.0196497	0.0460434	0.0327671	0.044971	0.000992754	0.00064878	0.00059354	0.0146575	0.0119645	0.00119016	0.00219198	0.00339481	0.00321249	0.00701448	0.00311924
	Others	Oxylipins	Oxylipins	Not used	FFA (18:3-OH)	0.00113597	0.000612158	0.000729252	0.000853478	0.000453317	0.000379549	0.000457283	0.00137454	0.000948997	0.00597243	0.00910317	0.00501967	0.00316033	0.0215887	0.00188382	0.000809615	0.00110482	0.000365176	0.000609087	0.00191447	0.00211908	0.000186559	0.00655731	0.0193148	0.00897185	0.00976711	0.00664191	0.00315112	0.000656509	0.00103174	0.00506448	0.00677578	0.0140049	0.000351626	0.000199431	0.000164719	0.00243438	0.0891982	0.000241221	0.00214333	0.00176431	0.00211929	0.00450017	0.00416516
	Others	Oxylipins	Oxylipins	Not used	FFA (18:4-OH)	0.110357	0.0813192	0.0575171	0.10613	0.137529	0.114905	0.249602	0.100298	0.138548	0.178477	0.160237	0.10121	0.210696	0.219819	0.120868	0.0337229	0.0381407	0.00629552	0.0113274	0.0163833	0.0136186	0.0100063	0.153811	0.0445237	0.0198377	0.0471021	0.0368419	0.704404	0.203268	0.211166	0.058998	0.0254236	0.0382831	0.0731288	0.0633766	0.063687	0.0805594	0.121008	0.176043	0.0786851	0.0693504	0.0732721	0.0317913	0.0292247
	Others	Oxylipins	Oxylipins	Not used	FFA (18:4-OOH)	0.0156842	0.0120507	0.00833462	0.0159913	0.0142549	0.0144468	0.0318571	0.0258213	0.0151174	0.0272086	0.0274258	0.0168422	0.0368313	0.028757	0.022988	0.0168454	0.0184617	0.00251707	0.00951025	0.0105043	0.00866419	0.00543205	0.0868198	0.0287308	0.00934379	0.0183528	0.0177673	0.408511	0.120961	0.115502	0.0196745	0.00853986	0.0127134	0.0197086	0.01726	0.0219599	0.0294944	0.0544123	0.0616786	0.0255865	0.0273152	0.0273879	0.0101444	0.0103828
	Others	Oxylipins	Oxylipins	Not used	FFA (18:5-OH)	0.0405277	0.0273336	0.0234377	0.0346921	0.0373513	0.030836	0.0792251	0.0366417	0.0464876	0.0812068	0.0691265	0.0424533	0.103125	0.0931064	0.0604796	0.0170808	0.0191369	0.00232793	0.00723146	0.0083892	0.00911062	0.00397771	0.0451522	0.0248442	0.0111224	0.0226278	0.0243324	0.305884	0.0958326	0.0830242	0.0613675	0.0237456	0.038356	0.0436749	0.0387461	0.0462946	0.0758591	0.0864262	0.132148	0.161631	0.138505	0.0852259	0.0311009	0.0359307
	Others	Oxylipins	Oxylipins	Not used	FFA (18:5-OOH)	0.00612107	0.00328237	0.00265541	0.00635629	0.00592754	0.00709047	0.0144784	0.0080418	0.0059643	0.0100333	0.0110104	0.00531679	0.0155236	0.0114647	0.00957768	0.00657401	0.00674357	0.000564386	0.00404114	0.00346506	0.00227445	0.00147728	0.0116592	0.00962819	0.00307955	0.00538328	0.00578023	0.113764	0.028367	0.024417	0.00924541	0.00295013	0.00527666	0.00435691	0.00574234	0.00719082	0.00674097	0.0191619	0.0240747	0.0110055	0.0122911	0.0152494	0.00403943	0.00454099
	Others	Oxylipins	Oxylipins	Not used	FFA (DHA-OH)	0.262275	0.159289	0.109421	0.289966	0.335345	0.238236	0.692374	0.23563	0.364287	0.143385	0.131878	0.0742366	0.206423	0.270897	0.119299	0.0816506	0.108442	0.00728656	0.0455431	0.0714577	0.027788	0.0173063	0.0582524	0.11023	0.0188986	0.0402972	0.0243526	0.388878	0.10823	0.109689	0.134864	0.0483867	0.078706	0.152208	0.144219	0.165809	0.111086	0.295279	0.458192	0.326714	0.211679	0.218132	0.0873397	0.10607
	Others	Oxylipins	Oxylipins	Not used	FFA (DHA-OOH)	0.0892148	0.0515471	0.0522116	0.0608693	0.0797568	0.0606104	0.181788	0.078743	0.111957	0.0967388	0.0817568	0.0376881	0.120872	0.134297	0.0685389	0.0669374	0.0822973	0.0104937	0.0226546	0.0333377	0.0190628	0.0102569	0.0258751	0.0551847	0.0249414	0.0445425	0.0284993	0.342382	0.107567	0.101502	0.0778254	0.0351742	0.041872	0.0683308	0.0562797	0.0700438	0.096327	0.130515	0.172135	0.114311	0.0889487	0.08562	0.0310932	0.0382905
	Pigments	Chlorophyls	Chlorophyls	Pigments	Chlorophyl-a	2.74022	1.78399	2.59471	0.975602	2.21116	3.30213	9.81942	0.91999	4.25075	1.2396	1.20765	1.07514	2.60925	4.9346	1.19742	0.754326	0.657653	0.780298	0.213736	0.210909	0.042245	0.0248174	0.182761	0.112718	1.43965	1.67309	0.803612	0.121236	0.0859579	0.144213	5.58894	1.48118	2.25542	1.08227	0.287689	0.547849	8.7284	0.570502	1.42775	1.66826	1.63996	1.92297	4.47102	4.69594
	Pigments	Chlorophyls	Chlorophyls	Pigments	Chlorophyl - c2	1.37969	0.737282	1.06328	1.65325	2.89659	3.10846	4.01676	0.706135	4.22164	0.64414	0.56811	0.648231	0.910602	2.02082	0.529573	1.68278	2.40113	1.02611	1.30226	0.988645	0.309926	0.110717	0.272407	2.141	0.522453	0.611593	0.531916	0.195416	0.118107	0.133084	2.91032	1.41927	3.19852	2.82018	1.95633	1.87744	3.92408	0.755543	1.06908	0.690878	0.626592	0.763721	2.25159	2.60793
	Pigments	Chlorophyls	Chlorophyls	Pigments	Chlorophyl-b	0.00590038	0.00435287	0.00431127	0.00547672	0.00725671	0.00661839	0.0229233	0.00480301	0.0141759	0.0120317	0.00423456	0.0026588	0.00478986	0.00717037	0.00599736	0.00799965	0.00170087	0.00279889	0.00389587	0.000318127	0.000834894	0.000760935	0.168929	0.00157687	0.0107466	0.0037614	0.0108758	0.00174143	0.00135727	0.00158488	0.011554	0.00428611	0.00849008	0.00527065	0.00266906	0.00242537	0.0274381	0.000518264	0.00558607	0.00399656	0.00359152	0.00385826	0.00829529	0.0146443
	Pigments	Chlorophyls	Chlorophyls	Pigments	Divinyl Chl-a	0.00206819	0.00156159	0.000952711	0.00391681	0.00552492	0.00320644	0.00400392	0.00123134	0.0117243	0.0010101	0.000779478	0.000939294	0.00108354	0.00305964	0.000701938	0.00160316	0.00241684	0.00168847	0.00124138	0.00178174	0.00156039	0.00039673	0.000821221	0.00147822	0.000380885	0.000578266	0.000703619	0.00131985	0.00020942	0.000304541	0.00243078	0.00117685	0.00203793	0.00245384	0.00272694	0.00117197	0.00617725	0.00170709	0.00111118	0.000327559	0.000598742	0.00109909	0.00233154	0.00397472
	Pigments	Chlorophyls	Chlorophyls	Pigments	Pheophytin a	0.272364	0.452969	0.560747	0.224693	0.818432	1.38548	0.687497	0.246683	1.40818	1.28566	1.67501	0.277082	0.564454	4.6682	0.586287	0.0846638	0.160406	0.588505	0.0736956	0.0265234	0.120114	0.017842	3.47791	0.069195	0.199556	0.179805	0.176789	0.117917	0.0146335	0.0789328	0.67419	1.33754	8.61994	3.07705	1.76005	0.107568	8.5102	1.10258	3.20306	2.12862	1.90765	1.86605	5.983	5.68692
	Pigments	Carotenoids	Carotenoids	Pigments	Diadinoxanthin	0.497967	0.251521	0.33609	0.486866	0.796709	0.785527	1.67703	0.200657	1.03582	0.169097	0.145061	0.180709	0.3079	0.622891	0.169167	0.279727	0.273303	0.0788653	0.101395	0.0865663	0.0389484	0.0114635	0.0436885	0.103504	0.14695	0.211156	0.160045	0.102474	0.0440786	0.0520157	0.514203	0.193928	0.481611	0.475293	0.204723	0.180841	0.994684	0.1569	0.18351	0.217801	0.232269	0.27544	0.769882	0.812
	Pigments	Carotenoids	Carotenoids	Pigments	Diatoxathin	0.0140224	0.0077646	0.0111421	0.108173	0.281322	0.263479	0.100364	0.00553432	0.0814636	0.00601325	0.00578977	0.00686977	0.00217504	0.00950806	0.00248214	0.00604893	0.00522013	0.00271392	0.0222574	0.0187459	0.00863723	0.00215995	0.00153965	0.00991954	0.0016124	0.00219256	0.00215202	0.00296157	0.00254166	0.0044812	0.0017493	0.000673538	0.00344848	0.0144777	0.00741904	0.00581664	0.0314671	0.000211066	0.00198764	0.00166005	0.00255029	0.00371946	0.00901411	0.0128891
	Pigments	Carotenoids	Carotenoids	Pigments	Dinoxanthin	0.10282	0.0501764	0.0665432	0.12712	0.213509	0.237159	0.313582	0.0516522	0.215404	0.0385205	0.0313748	0.040994	0.0635359	0.146159	0.0364122	0.0671442	0.0554258	0.0141049	0.0217331	0.0235886	0.007561	0.00404835	0.00962663	0.0179684	0.0404744	0.0547861	0.0343003	0.0141126	0.00539728	0.00739322	0.109252	0.0329234	0.0993514	0.0830661	0.0349364	0.0306572	0.146866	0.0328546	0.0457031	0.0468957	0.048046	0.0566966	0.161005	0.15879
	Pigments	Carotenoids	Carotenoids	Pigments	19 - but - Fucoxanthin	0.000797656	0.00085074	0.000655715	0.000852678	0.00146813	0.000900741	0.00301628	0.000387496	0.00261045	0.000251306	7.44499e-05	0.000111864	9.89615e-05	0.000477995	0.000105576	0.00095191	0.000469877	0.000507045	0.000437398	5.01577e-05	0.000142799	0.000101838	0.000335478	0.000799497	3.84261e-05	0.000147672	0.000129169	0.000153522	8.02969e-05	0.000107849	0.00116449	0.000871842	0.00229902	0.00156976	0.00121115	0.000285942	0.000235411	0.000436916	0.000466031	0.000115827	6.34216e-05	4.59494e-05	0.000133734	0.000347894
	Pigments	Carotenoids	Carotenoids	Pigments	Fucoxanthin	8.41852e-05	0.000122584	0.000176248	0.000187157	7.49233e-05	0.00114314	0.00119581	0.000181876	0.00122621	0.000109779	0.000419416	8.89716e-05	0.000390981	0.00016258	8.54119e-05	0.000375003	0.000260016	0.000188205	0.00146553	0.000326642	0.000227566	0.00156003	0.000311069	0.000498837	0.000145344	0.000221641	0.00020759	0.000144573	0.00264871	0.00213429	0.000294466	0.000199526	0.000897908	0.000299357	0.00033305	0.000355923	0.00137342	6.71913e-05	0.000186033	0.000697457	0.000156808	0.000233971	0.000561202	0.00120072
	Pigments	Carotenoids	Carotenoids	Pigments	Lutein	0.0964028	0.0943881	0.0392093	0.226266	0.30447	0.646071	0.380779	0.0859708	0.299658	0.0265457	0.0269949	0.0335507	0.0174689	0.0773503	0.0500694	0.217205	0.158745	0.0945095	0.24753	0.160717	0.0480273	0.0484721	0.0529446	0.176229	0.00259392	0.00349218	0.00413303	0.0436526	0.0231107	0.0348505	0.159808	0.06424	0.160352	0.217476	0.277421	0.287495	0.174731	0.0195713	0.0107476	0.00798882	0.00787157	0.00842193	0.0321692	0.0364034
	Pigments	Carotenoids	Carotenoids	Pigments	Peridinin	2.28279	1.47308	1.68788	2.73415	4.19508	5.09027	7.6682	1.3961	6.92182	1.1939	1.01649	1.04169	1.5951	3.56761	1.05402	2.84902	2.51284	1.2688	0.923943	0.880674	0.290553	0.135627	0.374173	1.232	1.07227	1.18324	0.885239	0.323728	0.177614	0.23626	4.95556	1.94177	5.87327	3.95739	1.95986	1.97291	5.31812	1.16529	2.01405	1.5175	1.54483	1.98978	5.66932	5.15097
	Pigments	Carotenoids	Carotenoids	Pigments	Pyrrhoxanthin	0.321157	0.158168	0.138901	0.320929	0.48386	0.461424	0.606599	0.158408	0.819145	0.137123	0.11408	0.10469	0.166784	0.367392	0.0873992	0.268268	0.225872	0.143885	0.114816	0.0866144	0.0436396	0.0249002	0.0719591	0.170774	0.0871766	0.092602	0.107273	0.0427307	0.0207958	0.0233618	0.538014	0.217787	0.46618	0.44793	0.303661	0.162555	0.423258	0.172177	0.258095	0.123858	0.124886	0.159217	0.444555	0.671125
	Pigments	Carotenoids	Carotenoids	Pigments	Violaxanthin	0.0126941	0.00491129	0.00435858	0.0069297	0.0166908	0.0144228	0.0202518	0.00459374	0.0129653	0.00443333	0.00301884	0.00032433	0.00660254	0.0144548	0.00382764	0.0127977	0.0154292	0.00215133	0.00184521	0.00328727	0.00105979	2.65752e-05	0.00516615	0.00438535	0.0068026	0.0096102	0.0102612	0.00565011	0.00207218	0.00223307	0.0217357	0.00572217	0.0189454	0.0132568	0.00605517	0.00849152	0.0158369	0.000230072	0.000771629	0.000253825	0.00611789	0.00618097	0.0232793	0.0309073
	Pigments	Carotenoids	Carotenoids	Pigments	Zeaxanthin	0.00676262	0.00450228	0.0141937	0.0166509	0.0175153	0.0273246	0.0494438	0.000196584	0.0269509	0.00319613	0.0018971	0.000262924	0.00206719	0.00695175	0.000281481	0.0168439	0.0223507	0.00524447	0.0208951	0.00984867	0.00696482	6.1085e-05	0.00694822	0.0173568	0.001389	0.000878924	0.000864564	0.00178491	0.00159302	0.00255418	0.0154217	0.00434762	0.0204262	0.0281374	0.01421	0.0209842	0.0727745	0.000802656	0.000623102	7.29825e-05	0.00189372	0.00215629	0.00522108	0.00399539
	Others	Plastoquinone	Plastoquinone	Plastoquinone	Plastoquinone	0.0661258	0.0454688	0.0678683	0.0869893	0.0929218	0.116404	0.181316	0.0312671	0.149438	0.029249	0.0229837	0.0119557	0.039073	0.112197	0.0205413	0.0168606	0.0295042	0.0211718	0.0111781	0.0173699	0.00253792	0.00180724	0.0156316	0.00773209	0.0244133	0.0293495	0.0215288	0.00570713	0.0044163	0.00414188	0.125037	0.0414502	0.0746901	0.0361653	0.0167884	0.017081	0.228788	0.0322686	0.0572509	0.0900193	0.139055	0.0714217	0.0219354	0.0376828
	Membrane	Cholesterol	Cholesterol	Cholesterol	Cholesterol	0.225225	0.169696	0.0969165	0.929953	0.525562	1.42322	1.64849	0.824547	1.77021	0.318918	1.27557	0.254018	0.282633	0.22797	0.563349	0.137785	0.235629	0.0949554	0.138968	0.182245	0.102835	0.287343	0.535152	0.327892	4.13555	2.22133	2.31764	0.0965088	0.1602	0.153239	0.080972	0.0127538	0.055409	0.0466082	0.0403598	0.0618805	0.0125208	2.86303	0.13812	0.0550806	0.030438	0.0417337	0.226612	0.276974
	Storage	CE	CE	Not used	CE (18:1)	0.511713	0.574045	0.523866	1.28651	0.441741	0.809896	1.4394	0.391118	1.79884	0.15164	0.0705035	0.151005	0.179744	0.340661	0.0877362	0.105738	0.177899	0.104658	0.456498	0.137263	0.284296	0.123122	0.356505	0.228189	0.026863	0.043698	0.0944812	4.45706	1.14716	1.84198	0.326523	0.1589	0.258527	0.344746	0.111442	0.139156	0.07686	0.998016	0.475024	0.00254448	0.00257915	0.00282681	0.0644545	0.0934781
	Storage	CE	CE	Not used	CE (20:3)	2.02736	1.88909	2.83873	1.06993	0.926677	1.02745	6.44552	0.505615	2.88857	1.05923	0.839241	0.372517	1.10544	1.40415	0.330066	0.0531786	0.0558994	0.0858001	0.0328991	0.036664	0.0626638	0.029717	0.182744	0.0554394	0.00243984	0.0150442	0.0208456	0.13799	0.0963766	0.0125126	1.48159	1.14402	1.39466	0.867003	0.592165	0.266178	4.9392	0.0290317	1.01206	0.204078	0.150688	0.20778	0.292161	0.521938
	Storage	CE	CE	Not used	CE (DHA)	1.01104	1.51454	1.37419	0.829382	0.629905	0.872995	4.36213	0.331262	2.59301	0.170265	0.123521	0.0667689	0.285435	0.380406	0.104174	0.0776448	0.0578163	0.109749	0.258171	0.265783	0.113913	0.0331819	0.0716069	0.161252	0.12478	0.086445	0.0937505	0.65515	0.384212	0.65011	0.195162	0.211289	0.275736	0.0349781	0.0198998	0.0227473	0.745356	0.00202255	0.199157	0.0829236	0.0539032	0.0265087	0.140703	0.472952
	Others	DAG	DAG	Not used	DAG (14:0/16:0)	0.0265066	0.0350873	0.0541132	0.0416118	0.0254585	0.033817	0.132901	0.047841	0.244497	0.0106396	0.0111924	0.0182307	0.0159496	0.0433858	0.00706961	0.00573982	0.00502251	0.019448	0.00467032	0.00839679	0.00575739	0.0168251	0.0129491	0.0165137	0.472248	0.0139019	0.0175311	0.103929	0.083684	0.242135	0.059378	0.0182613	0.0232929	0.0195873	0.00425384	0.00961559	0.00903543	0.176893	0.077437	0.0146531	0.0183957	0.0197166	0.044378	0.0556377
	Others	DAG	DAG	Not used	DAG (16:0/16:0)	0.0933414	0.120283	0.204801	0.116622	0.0734493	0.0951132	0.296682	0.0914303	0.518386	0.0374468	0.0412641	0.0549335	0.0535889	0.142575	0.0176225	0.00906664	0.00779298	0.0305797	0.00737903	0.0135876	0.0115286	0.0239751	0.0276497	0.0266989	0.552863	0.0158161	0.020778	0.242416	0.158991	0.3707	0.0677579	0.0237175	0.0258997	0.0187014	0.00559786	0.0127064	0.0165324	0.291992	0.0921051	0.0085393	0.00931732	0.0130778	0.0251787	0.0342335
	Others	DAG	DAG	Not used	DAG (16:0/16:1)	0.315262	0.444063	0.680333	0.334845	0.221174	0.450661	1.8233	0.658449	2.73761	0.142187	0.185605	0.212586	0.404852	0.982937	0.163208	0.042131	0.0343638	0.15544	0.0214061	0.0295643	0.0190016	0.0761311	0.0689098	0.0520268	6.9362	0.184145	0.194938	0.555756	0.443813	1.51739	0.345545	0.0934869	0.144489	0.0325034	0.00633135	0.0179308	0.0176257	0.390114	0.218567	0.0961023	0.103536	0.107865	0.258409	0.306496
	Others	DAG	DAG	Not used	DAG (16:0/18:0)	0.0160706	0.0246189	0.02613	0.0834115	0.038592	0.0810052	0.0895396	0.0347679	0.266102	0.0152613	0.0142504	0.0272288	0.0194692	0.0532519	0.0111921	0.014375	0.00986095	0.0396578	0.0265145	0.0320193	0.0312247	0.040885	0.0416438	0.100956	0.389853	0.00789961	0.0123842	0.216903	0.215173	0.567194	0.0249963	0.00946814	0.0216429	0.0216662	0.00831659	0.0268933	0.00615689	0.370333	0.0341496	0.010436	0.00602182	0.00934574	0.0212079	0.0367629
	Others	DAG	DAG	Not used	DAG (16:0/18:1)	0.195203	0.264128	0.442368	0.149494	0.0816162	0.163888	0.363836	0.118694	0.523889	0.0285126	0.0359179	0.0502621	0.0492625	0.139407	0.0177669	0.0274001	0.0228801	0.105609	0.0144213	0.023259	0.0160418	0.0472022	0.0363615	0.044338	1.56569	0.0440738	0.0484826	0.294475	0.20204	0.629608	0.212872	0.0681841	0.10482	0.0420516	0.00919747	0.0329572	0.0323143	0.334931	0.209502	0.0498173	0.0504901	0.068544	0.133539	0.142047
	Others	DAG	DAG	Not used	DAG (16:0/18:2)	0.056095	0.0866958	0.111945	0.0540994	0.0301886	0.0516245	0.264789	0.11287	0.408362	0.0218613	0.0243281	0.0368535	0.0455597	0.105383	0.0178923	0.0143581	0.0116534	0.0500646	0.00727499	0.00991041	0.00819759	0.0267047	0.0359449	0.0255376	2.45845	0.0592929	0.0708421	0.152919	0.156823	0.510195	0.0567847	0.0221602	0.0219897	0.00536835	0.00168367	0.00456652	0.00455033	0.0696019	0.034721	0.0121999	0.0113661	0.0129406	0.0309074	0.0337561
	Others	DAG	DAG	Not used	DAG (16:0/18:3)	0.0573242	0.0959274	0.118546	0.021849	0.015304	0.0222556	0.166998	0.0557825	0.279567	0.016214	0.0200141	0.0248075	0.0324061	0.0910894	0.0105917	0.00675964	0.00539912	0.0301465	0.00183741	0.00349848	0.00214932	0.00649335	0.0144664	0.00406912	1.16041	0.0293162	0.0351111	0.0613062	0.0562457	0.187366	0.0476448	0.0165657	0.0169338	0.00276026	0.0005799	0.00143218	0.00381168	0.0510452	0.0275041	0.0100238	0.00903939	0.0108177	0.027728	0.0382085
	Others	DAG	DAG	Not used	DAG (16:0/18:4)	0.179827	0.252368	0.376799	0.194145	0.174078	0.207461	0.689969	0.172215	0.896159	0.11731	0.127895	0.121708	0.216341	0.715412	0.0607908	0.0180148	0.013898	0.098833	0.00336488	0.00685198	0.00300675	0.0111854	0.0222124	0.00728275	1.70215	0.0531149	0.0544624	0.116655	0.0848962	0.317681	0.262622	0.0909733	0.135212	0.0259319	0.00352066	0.0105525	0.0254204	0.163611	0.151245	0.035595	0.034867	0.044616	0.0962195	0.127645
	Others	DAG	DAG	Not used	DAG (16:0/DHA)	0.187681	0.248154	0.44429	0.19998	0.181009	0.224016	1.06478	0.24226	1.56937	0.0550641	0.0524183	0.0702651	0.132239	0.501615	0.0385223	0.0126267	0.00948153	0.0616449	0.00447179	0.0120618	0.00530641	0.0135878	0.0156123	0.00875996	1.03938	0.0333359	0.0353115	0.116315	0.0763746	0.261709	0.371014	0.132628	0.14115	0.0626291	0.0100325	0.0237228	0.0441798	0.281845	0.31983	0.101663	0.127082	0.130448	0.343692	0.396877
	Others	DAG	DAG	Not used	DAG (16:1/18:5)	0.0304314	0.0467217	0.0774757	0.0426695	0.0307421	0.0554433	0.229051	0.0224144	0.300186	0.0255132	0.0214352	0.0259323	0.0815495	0.210039	0.0171566	0.00957502	0.00578391	0.0412317	0.00223904	0.00604626	0.00241335	0.00176594	0.00424157	0.00880334	1.43466	0.0327562	0.0269179	0.0299348	0.0316534	0.0719957	0.0180847	0.0131421	0.00900834	0.00830988	0.00157509	0.00362769	0.00386747	0.0169354	0.0118645	0.0185199	0.0206049	0.0178894	0.0591233	0.0594158
	Others	DAG	DAG	Not used	DAG (18:0/ 18:0)	0.021094	0.0352877	0.0336811	0.144834	0.0855224	0.184715	0.180214	0.0413539	0.612429	0.0146588	0.0122282	0.0386537	0.0224926	0.0519077	0.014859	0.0270231	0.0209119	0.0816847	0.0554641	0.0706805	0.0716133	0.0369534	0.0382541	0.202153	0.268443	0.00748895	0.0075245	0.23453	0.359887	0.778188	0.0430774	0.0145931	0.0305567	0.037145	0.0172996	0.0677305	0.00779307	0.505695	0.0175165	0.00561915	0.00396325	0.0065329	0.0156295	0.0156141
	Others	DAG	DAG	Not used	DAG (DHA/DHA)	0.0627692	0.0738925	0.167491	0.0619905	0.0640443	0.0751703	0.639086	0.110844	0.88926	0.0168006	0.0136736	0.0164274	0.0391049	0.168944	0.0135341	0.00443075	0.00301556	0.0165145	0.00244043	0.00571122	0.00339215	0.00998573	0.0094478	0.0077387	0.254476	0.00712207	0.00528599	0.047286	0.0181815	0.134091	0.104718	0.0307321	0.0306916	0.0273658	0.00423778	0.0111722	0.016974	0.0839715	0.106631	0.0491719	0.0840626	0.0815495	0.234137	0.215903
	Membrane	glycolipids	SQDG	glycolipids	SQDG (14:0/16:0)	0.0898264	0.232689	0.373308	0.0472492	0.0379722	0.0601643	0.297714	0.0839306	0.448512	0.14396	0.102297	0.106775	0.287818	0.219211	0.0472514	0.0224956	0.0158113	0.327003	0.0202146	0.0253251	0.0290063	0.0539457	0.0148217	0.0603643	4.99038	0.211489	0.206844	0.307098	0.306049	0.932989	0.0850308	0.327039	0.0738554	0.020182	0.00807886	0.00699328	0.133368	0.827237	0.130185	0.0895717	0.124196	0.0712249	0.258715	0.287328
	Membrane	glycolipids	SQDG	glycolipids	SQDG (14:0/16:1)	0.0361875	0.0685708	0.0956842	0.0339802	0.024703	0.0390038	0.1497	0.0638568	0.261218	0.0929363	0.0826531	0.109307	0.201381	0.238529	0.038921	0.00991804	0.00841882	0.0849231	0.00828501	0.0109161	0.00588502	0.01594	0.0158755	0.0306059	2.57326	0.116495	0.0989913	0.144174	0.15585	0.427647	0.0437253	0.068573	0.0274863	0.00778579	0.00300714	0.00473553	0.0158043	0.150191	0.0929799	0.0890152	0.0954101	0.129065	0.307119	0.251149
	Membrane	glycolipids	SQDG	glycolipids	SQDG (14:1/ 16:0)	0.0240661	0.0437604	0.0981769	0.0235168	0.0165885	0.0416698	0.173823	0.0561072	0.149012	0.0817676	0.0733502	0.103833	0.111993	0.155839	0.042984	0.0105946	0.00920701	0.0547311	0.00895698	0.0112206	0.0044302	0.0142232	0.012091	0.0201232	2.85842	0.130497	0.0418524	0.0831549	0.197576	0.511896	0.0298398	0.0411432	0.0318584	0.00576263	0.00216571	0.00556086	0.0182079	0.144194	0.0577017	0.102088	0.111574	0.142765	0.383702	0.1092
	Membrane	glycolipids	SQDG	glycolipids	SQDG (16:0/16:0)	0.00423937	0.0138313	0.027	0.00560858	0.00474942	0.00648818	0.0351485	0.0109652	0.052801	0.00958912	0.00768127	0.0109848	0.029119	0.0314496	0.00633059	0.00138509	0.000914744	0.0151602	0.00192853	0.00213574	0.00344891	0.00632786	0.007394	0.00739665	0.165586	0.00640927	0.0076634	0.0357543	0.0307644	0.0788424	0.00261016	0.0162236	0.00201764	0.0017408	0.000600526	0.000796886	0.0120569	0.0793696	0.00401789	0.00267062	0.00449969	0.00168006	0.00651572	0.010126
	Membrane	glycolipids	SQDG	glycolipids	SQDG (16:0/DHA-OH)	0.00356447	0.00528941	0.0101975	0.0040068	0.00311274	0.00489128	0.0180459	0.00273853	0.0250926	0.00141813	0.0014787	0.00312195	0.00726297	0.00818556	0.000889102	0.000694784	0.000385381	0.00384091	0.000146424	0.000470785	0.000331954	0.000227446	0.000472164	0.000371849	0.223867	0.00741753	0.00345595	0.00879363	0.00560417	0.0173409	0.0112712	0.0204862	0.00607359	0.00207898	0.00035704	0.000483281	0.0174894	0.0394046	0.00495632	0.00842973	0.0109974	0.0118885	0.0279386	0.0174163
	Membrane	glycolipids	Gluc Acid	glycolipids	Gluc Acid (16:0/DHA)	0.0122985	0.0532639	0.118485	0.00693348	0.00565342	0.00633883	0.0765959	0.0352353	0.155014	0.0264932	0.0264169	0.0314592	0.110289	0.247583	0.0130198	0.00298721	0.00210111	0.0749277	0.000238354	0.000193921	0.00166085	0.00149471	0.00506166	0.000402594	3.15959	0.0871194	0.166893	0.165792	0.0457143	0.221682	0.058778	0.166088	0.023085	0.00252775	0.00120113	0.00128363	0.0148074	0.10722	0.0894206	0.0449147	0.0487841	0.0599719	0.104744	0.327517
	Membrane	glycolipids	Gluc Acid	glycolipids	Gluc Acid (18:4x2)	0.000149623	0.000475705	0.000766535	0.000624448	0.000298101	0.000785904	0.00241857	0.0010592	0.00468501	0.000319294	0.000332635	0.000224419	0.00098805	0.00284125	0.000354408	0.000182724	7.42603e-05	0.000377965	4.39486e-05	3.73283e-05	2.9891e-05	4.32409e-05	0.000117029	0.000181155	0.0548268	0.00136742	0.00181118	0.00350266	0.000786665	0.00255897	0.0170835	0.00611236	0.00404247	0.00216235	0.000339389	0.000492254	0.00259287	0.00946199	0.0176407	0.04098	0.0596949	0.056279	0.135166	0.143454
	Storage	TAG	TAG	Not used	ADG (o17/16:0/DHA)	0.00164845	0.00309032	0.000856516	0.0128119	0.00556365	0.00396782	0.00365849	0.00322214	0.0469162	0.00194089	0.00180509	0.00261361	0.008162	0.025652	0.000589165	0.000373302	0.000269539	0.00231296	0.000888211	0.00124389	0.000941619	0.00139789	0.00189843	0.0026451	0.0107223	0.000410653	0.0033477	0.0328903	0.00612883	0.0202772	0.00330514	0.00128257	0.000543908	0.00442426	0.00150237	0.00104765	0.000338685	0.0164009	0.014934	0.000231331	0.000230784	0.0001623	0.000553236	0.00468293
	Storage	TAG	TAG	Not used	ADG (o17/18:0/18:1)	0.00086974	0.00173697	0.00061925	0.0160413	0.00306621	0.00356341	0.00143371	0.00212598	0.0186676	0.000702385	0.000615108	0.00144312	0.0026696	0.0057938	0.000335362	0.000191528	0.000209703	0.00139996	0.000622574	0.000963018	0.000993026	0.00152411	0.00258719	0.0059309	0.00525295	0.000190657	0.00138796	0.0346398	0.0054511	0.0175224	0.00179324	0.000587574	0.000261041	0.00238273	0.000844007	0.000442901	0.000315155	0.0136218	0.00369548	0.000112295	8.70723e-05	0.000163181	0.000193888	0.00239209
	Storage	TAG	TAG	Not used	TAG (10:0/18:1/18:1)	0.005018	0.006839	0.00488039	0.0435624	0.00828381	0.0217396	0.0176246	0.0167215	0.045867	0.00523306	0.00330708	0.000176697	0.00767713	0.0242572	0.00445148	0.00358339	0.00357745	0.00917913	0.00568793	0.00982786	0.00437323	0.0126827	0.0147801	0.0098087	0.101913	0.00358298	0.00486773	0.0806218	0.122657	0.235178	0.00984253	0.00327556	0.00479105	0.00545629	0.00193519	0.00358514	0.00300658	0.00168228	0.0282385	0.00156863	0.000918223	0.00144594	0.00454012	0.0060962
	Storage	TAG	TAG	Not used	TAG (12:0/16:0/18:1)	0.0267283	0.0466723	0.0392943	0.125282	0.0235419	0.0766346	0.0637706	0.0553018	0.106652	0.0236391	0.0196537	0.0404178	0.031197	0.0809222	0.0148586	0.0128165	0.0120864	0.0407227	0.0144689	0.0329785	0.0135107	0.0430339	0.0397557	0.0226449	0.881615	0.0231669	0.0247448	0.307525	0.380458	0.937248	0.0908537	0.0350599	0.0429956	0.053483	0.0165753	0.0239745	0.0362134	0.631212	0.245367	0.00752225	0.0045936	0.00514743	0.0141452	0.0197461
	Storage	TAG	TAG	Not used	TAG (14:0/14:0/14:0)	0.128859	0.224549	0.16982	0.741709	0.680517	0.814738	1.06438	2.01001	3.02163	1.63729	0.583348	0.00109467	3.24276	1.57803	0.496415	0.191436	0.111188	0.362672	0.294706	0.358382	0.209199	2.47945	2.53678	0.816347	27.6154	0.709778	0.357591	10.4179	21.9415	39.9116	0.306159	0.11588	0.237331	0.58409	0.603156	1.41556	0.725723	1.51402	1.11744	0.292939	0.311403	0.328743	0.976488	0.778866
	Storage	TAG	TAG	Not used	TAG (14:0/14:0/16:0)	0.0176223	0.0371645	0.0463052	0.0607214	0.0153301	0.0345112	0.0329123	0.0249774	0.0582319	0.0139653	0.0113245	0.0173778	0.014235	0.0284671	0.00520745	0.00481259	0.0043541	0.0200798	0.00611085	0.0161735	0.00611438	0.0189758	0.0151525	0.0154909	0.380491	0.00915092	0.0114965	0.140204	0.156149	0.320237	0.0629607	0.0273029	0.0261737	0.0391049	0.0182308	0.017144	0.0932937	0.283287	0.117266	0.00447424	0.00302189	0.00321281	0.00797737	0.0136705
	Storage	TAG	TAG	Not used	TAG (14:0/14:0/16:1)	0.00488579	0.0079856	0.00599962	0.0441926	0.00753403	0.0219542	0.0134579	0.0115307	0.0321889	0.00457289	0.00298989	0.0092158	0.00834025	0.0198994	0.00301474	0.00233542	0.00203862	0.00610361	0.00294214	0.00705171	0.00236708	0.0109107	0.00978396	0.0054867	0.109464	0.00282622	0.00456792	0.0649637	0.0787924	0.196094	0.0142665	0.0051326	0.00676127	0.00990466	0.00300885	0.00532076	0.00646527	0.00205079	0.0528886	0.00167606	0.00104137	0.00125455	0.00367638	0.00944338
	Storage	TAG	TAG	Not used	TAG (14:0/14:0/18:2)	0.005018	0.006839	0.00488039	0.0435624	0.00828381	0.0217396	0.0176246	0.0167215	0.045867	0.00523306	0.00330708	0.0134754	0.00767713	0.0242572	0.00445148	0.00358339	0.00357745	0.00917913	0.00568793	0.00982786	0.00437323	0.0126827	0.0147801	0.0098087	0.101913	0.00358298	0.00486773	0.0806218	0.122657	0.235178	0.00984253	0.00327556	0.00479105	0.00545629	0.00193519	0.00358514	0.00300658	0.00168228	0.0282385	0.00156863	0.000918223	0.00144594	0.00454012	0.0060962
	Storage	TAG	TAG	Not used	TAG (14:0/14:0/DHA)	0.0023333	0.00530139	0.00563112	0.0217403	0.00933372	0.0261881	0.0206122	0.00404953	0.032761	0.00108424	0.00134894	0.00135796	0.00297841	0.0099917	0.00153336	0.000772406	0.000506239	0.00211029	0.00136555	0.00392491	0.000860254	0.00238078	0.00382215	0.00149446	0.0246435	0.000555366	0.000522831	0.00842967	0.0100304	0.0236256	0.00803625	0.00354407	0.00412816	0.00708549	0.00201558	0.00329617	0.00331151	0.0320434	0.0249164	0.000846116	0.000723581	0.000912113	0.00166136	0.00234224
	Storage	TAG	TAG	Not used	TAG (14:0/15:0/16:0)	0.00338208	0.00443212	0.00325866	0.0301653	0.00872482	0.0163349	0.0154471	0.0224107	0.0448563	0.00755126	0.00410453	0.0178684	0.0136637	0.0250552	0.00508561	0.00295433	0.00242175	0.00652239	0.00639016	0.0133216	0.00545738	0.0210451	0.0185036	0.0171956	0.155965	0.00343283	0.00510066	0.126059	0.183025	0.333341	0.00536043	0.00175398	0.00238486	0.00637999	0.0778681	0.00427934	0.00387507	0.184083	0.0111181	0.00306791	0.00162786	0.0024567	0.00801564	0.0114742
	Storage	TAG	TAG	Not used	TAG (14:0/16:0/16:0)	0.0704542	0.165395	0.214269	0.113081	0.0379609	0.0817597	0.119235	0.0581071	0.173131	0.0412486	0.0343683	0.0383997	0.0330997	0.0580523	0.0118271	0.0152027	0.0127249	0.0677781	0.0164445	0.0375052	0.0176364	0.0383109	0.0319677	0.0312803	0.961187	0.0254288	0.0268508	0.243687	0.323802	0.605206	0.139079	0.0759208	0.0664913	0.0843559	0.0404483	0.0370567	0.319338	0.600289	0.261226	0.00847685	0.00574007	0.00677724	0.0170514	0.0226956
	Storage	TAG	TAG	Not used	TAG (14:0/16:0/16:1)	0.0267283	0.0466723	0.0392943	0.125282	0.0235419	0.0766346	0.0637706	0.0553018	0.106652	0.0236391	0.0196537	0.0404178	0.031197	0.0809222	0.0148586	0.0128165	0.0120864	0.0407227	0.0144689	0.0329785	0.0135107	0.0430339	0.0397557	0.0226449	0.881615	0.0231669	0.0247448	0.307525	0.380458	0.937248	0.0908537	0.0350599	0.0429956	0.053483	0.0165753	0.0239745	0.0362134	0.631212	0.245367	0.00752225	0.0045936	0.00514743	0.0141452	0.0197461
	Storage	TAG	TAG	Not used	TAG (14:0/16:0/17:1)	0.00690239	0.00614372	0.0043784	0.0523345	0.00909808	0.0234834	0.0220492	0.0334579	0.0588811	0.00936492	0.00522338	0.030453	0.0138066	0.042372	0.00715569	0.00446781	0.00494186	0.00865676	0.00967693	0.013679	0.0084365	0.0299678	0.0334377	0.0165577	0.161437	0.004328	0.00700568	0.1848	0.262272	0.542114	0.00753532	0.00194895	0.00349851	0.00623643	0.00237745	0.00458373	0.0013442	0.0175765	0.0169742	0.00395742	0.00169937	0.00360558	0.0112035	0.0116217
	Storage	TAG	TAG	Not used	TAG (14:0/16:0/18:0)	0.235121	0.472368	0.806134	0.201326	0.0667111	0.147739	0.313902	0.0828774	0.25152	0.159755	0.133931	0.0769604	0.0864489	0.120096	0.0225871	0.0184148	0.014333	0.0720078	0.029272	0.0422918	0.0220923	0.0368071	0.0342683	0.0340324	1.02575	0.0265829	0.0313057	0.27843	0.303839	0.537338	0.131445	0.092603	0.0664379	0.0735788	0.0397517	0.0310334	0.409422	0.515153	0.246459	0.00815374	0.00583768	0.00740086	0.0151259	0.0232015
	Storage	TAG	TAG	Not used	TAG (14:0/16:0/18:1)	0.140002	0.272506	0.256622	0.345362	0.0798175	0.309212	0.301699	0.159174	0.409712	0.170973	0.159845	0.124397	0.219292	0.519117	0.0858173	0.0368522	0.0294512	0.119254	0.0292897	0.0787564	0.0283531	0.0902045	0.0814692	0.0473005	2.21303	0.0655826	0.0578419	0.43647	0.747207	1.84009	0.237977	0.0967706	0.123995	0.153422	0.0471995	0.0658139	0.101286	0.990059	0.0287512	0.0181004	0.0123369	0.0123989	0.0304162	0.039248
	Storage	TAG	TAG	Not used	TAG (14:0/16:0/18:2)	0.0229256	0.046055	0.0343105	0.138419	0.0281795	0.101844	0.0898114	0.052407	0.184901	0.0209429	0.0168153	0.0435339	0.0442957	0.128947	0.0211368	0.0139005	0.0124168	0.0383858	0.0177293	0.0309535	0.014488	0.0405441	0.0427116	0.0307093	0.439355	0.0123295	0.0149667	0.214309	0.337495	0.79406	0.0424059	0.0162589	0.0192033	0.0186972	0.00577069	0.0100768	0.013147	0.440186	0.111486	0.00482211	0.00274064	0.004295	0.0109215	0.0169958
	Storage	TAG	TAG	Not used	TAG (14:0/16:0/18:3)	0.00523854	0.0103616	0.00695832	0.0305095	0.00710659	0.0206618	0.0216707	0.0138334	0.0491962	0.00752022	0.00139472	0.0127921	0.0106253	0.0343662	0.00449216	0.0041734	0.00373869	0.0131831	0.00500158	0.00954793	0.00385553	0.0109786	0.0128032	0.00947998	0.178397	0.00551807	0.00617238	0.0768779	0.089965	0.22462	0.0149825	0.00568547	0.00723024	0.00621188	0.00224751	0.00468225	0.00670564	0.0167889	0.0182053	0.00147079	0.00098562	0.0013708	0.00395949	0.00499421
	Storage	TAG	TAG	Not used	TAG (14:0/16:0/DHA)	0.00999171	0.0210145	0.0226462	0.0603658	0.0229071	0.0701257	0.0688172	0.0143352	0.103183	0.0065349	0.00576113	0.00627452	0.00920982	0.0310621	0.00294076	0.00439738	0.00344747	0.0153593	0.00441134	0.0175728	0.00358878	0.00738053	0.00936503	0.00670136	0.136377	0.00338579	0.00353485	0.0509986	0.0520786	0.160522	0.0333847	0.0137566	0.0165013	0.0370113	0.00956727	0.0169709	0.0130653	0.103531	0.104967	0.00226444	0.00171984	0.00123075	0.00291835	0.00549553
	Storage	TAG	TAG	Not used	TAG (14:0/16:1/18:1)	0.0229256	0.046055	0.0343105	0.138419	0.0281795	0.101844	0.0898114	0.052407	0.184901	0.0209429	0.0168153	0.0435339	0.0442957	0.128947	0.0211368	0.0139005	0.0124168	0.0383858	0.0177293	0.0309535	0.014488	0.0405441	0.0427116	0.0307093	0.439355	0.0123295	0.0149667	0.214309	0.337495	0.79406	0.0424059	0.0162589	0.0192033	0.0186972	0.00577069	0.0100768	0.013147	0.440186	0.111486	0.00482211	0.00274064	0.004295	0.0109215	0.0169958
	Storage	TAG	TAG	Not used	TAG (14:0/18:1/18:1)	0.021066	0.0601947	0.0345509	0.109261	0.0172414	0.0892933	0.102214	0.0360927	0.228393	0.0325546	0.0282001	0.0323485	0.0152929	0.0368627	0.0128162	0.0142925	0.011658	0.0383664	0.0204579	0.0349027	0.0157887	0.0247451	0.0300036	0.0499637	0.398325	0.0134052	0.00980245	0.139785	0.205818	0.522718	0.0419748	0.0162264	0.0150819	0.0151616	0.00450621	0.00974468	0.013656	0.264209	0.0660818	0.00394238	0.00273041	0.000506182	0.00796389	0.00902768
	Storage	TAG	TAG	Not used	TAG (14:0/18:1/18:3)	0.00606687	0.0104997	0.00621646	0.0178389	0.00711669	0.0150753	0.0141316	0.00921963	0.0291376	0.00615297	0.00662689	0.00835323	0.0106897	0.0324135	0.00298524	0.00180564	0.00153162	0.00671044	0.00193528	0.00450512	0.00217634	0.00494901	0.00547953	0.00437931	0.0714366	0.00207263	0.00225264	0.0188887	0.027282	0.0680111	0.0106387	0.00341155	0.00559721	0.00854553	0.00315512	0.00422199	0.00205843	0.0790697	0.0156962	0.000658398	0.000402725	0.000454334	0.00106909	0.00149293
	Storage	TAG	TAG	Not used	TAG (14:0/18:1/22:1)	0.0035854	0.0117688	0.00772329	0.134453	0.0134239	0.0603868	0.0313145	0.0116012	0.090906	0.00273099	0.00147363	0.00742719	0.00356364	0.0119098	0.00210302	0.00462228	0.00323434	0.010464	0.00999497	0.016635	0.00666995	0.0130772	0.0118512	0.0271796	0.0359075	0.00155867	0.00211222	0.0372756	0.0663325	0.14916	0.00950872	0.00307545	0.00137093	0.00623842	0.00149363	0.00269377	0.000675452	0.052582	0.00786829	0.000732255	0.000365733	0.00107198	0.00183784	0.00290535
	Storage	TAG	TAG	Not used	TAG (14:1/16:1/18:2)	0.0037635	0.00918489	0.00747594	0.0199644	0.00729334	0.021641	0.0193769	0.00608894	0.026187	0.010172	0.0103943	0.00687651	0.0056755	0.0180381	0.00172112	0.00257923	0.00227036	0.0101304	0.00206391	0.00689975	0.00164922	0.00433896	0.00372968	0.00341601	0.159282	0.00442172	0.00414253	0.0461631	0.0395369	0.118576	0.0504636	0.0189481	0.0262781	0.0223735	0.00639289	0.0104208	0.0174014	0.0144821	0.125174	0.00125862	0.00090922	0.000720371	0.00172081	0.00275238
	Storage	TAG	TAG	Not used	TAG (15:0/16:0/16:0)	0.00384187	0.00577176	0.00463468	0.0292952	0.00700683	0.0150137	0.015474	0.0191333	0.0474004	0.00596855	0.00371011	0.0160326	0.0091469	0.0203826	0.00413975	0.00235318	0.00209867	0.00581599	0.00598472	0.013356	0.00529967	0.0153908	0.0151884	0.0127157	0.1225	0.00239436	0.00414129	0.110846	0.135623	0.246115	0.00479201	0.00178721	0.00227048	0.00561032	0.00340172	0.00318832	0.00629864	0.0341307	0.0106819	0.00254696	0.00122052	0.00202311	0.00623391	0.0094511
	Storage	TAG	TAG	Not used	TAG (15:0/16:0/18:1)	0.00564024	0.00684962	0.0049775	0.0675097	0.00977001	0.0276954	0.0202263	0.0261289	0.05065	0.00743984	0.00420622	0.0237941	0.0110539	0.0320251	0.00587629	0.00356401	0.00373912	0.00791865	0.00789389	0.0131704	0.00677164	0.0223109	0.0237441	0.0145122	0.121845	0.00368664	0.00571972	0.126732	0.17309	0.367976	0.00809204	0.00193331	0.00336975	0.00714167	0.00254108	0.00417436	0.00180925	0.273578	0.0162433	0.00303376	0.00150583	0.00269128	0.00730943	0.012271
	Storage	TAG	TAG	Not used	TAG (16:0/ 18:1/18:1)	0.00118756	0.0016587	0.00114858	0.00845608	0.00447748	0.0046104	0.00784517	0.00511536	0.0141036	0.00150474	0.00163006	0.00248398	0.00258933	0.00402125	0.00116715	0.00108103	0.00120084	0.00186977	0.00195982	0.00217077	0.00259812	0.00321889	0.00436852	0.00774153	0.00106915	0.000404276	0.000475433	0.0263191	0.0217178	0.0351784	0.00152211	0.00101914	0.0010237	0.00215583	0.00214103	0.0021668	0.000613783	0.00676962	0.00172642	0.000381814	0.00031946	0.000406104	0.00100301	0.00195238
	Storage	TAG	TAG	Not used	TAG (16:0/16:0/16:0)	0.235121	0.472368	0.806134	0.201326	0.0667111	0.147739	0.313902	0.0260128	0.25152	0.0130713	0.016226	0.00721625	0.032368	0.0825402	0.0067724	0.0184148	0.014333	0.0720078	0.029272	0.0422918	0.0220923	0.015004	0.0126062	0.0340324	0.128383	0.00381633	0.00907475	0.0627099	0.0436089	0.0643297	0.131445	0.092603	0.0664379	0.0735788	0.0397517	0.0310334	0.409422	0.515153	0.0823375	0.00100745	0.000547659	0.000732936	0.00211005	0.00281133
	Storage	TAG	TAG	Not used	TAG (16:0/16:0/16:1)	0.140002	0.272506	0.256622	0.345362	0.0798175	0.309212	0.301699	0.159174	0.409712	0.170973	0.159845	0.124397	0.219292	0.519117	0.0858173	0.0368522	0.0294512	0.119254	0.0292897	0.0787564	0.0283531	0.0902045	0.0814692	0.0473005	2.21303	0.0655826	0.0578419	0.43647	0.747207	1.84009	0.237977	0.0967706	0.123995	0.153422	0.0471995	0.0658139	0.101286	0.990059	0.0287512	0.0181004	0.0123369	0.0123989	0.0304162	0.039248
	Storage	TAG	TAG	Not used	TAG (16:0/16:0/17:1)	0.00564024	0.00684962	0.0049775	0.0675097	0.00977001	0.0276954	0.0202263	0.0261289	0.05065	0.00743984	0.00420622	0.0237941	0.0110539	0.0320251	0.00587629	0.00356401	0.00373912	0.00791865	0.00789389	0.0131704	0.00677164	0.0223109	0.0237441	0.0145122	0.121845	0.00368664	0.00571972	0.126732	0.17309	0.367976	0.00809204	0.00193331	0.00336975	0.00714167	0.00254108	0.00417436	0.00180925	0.273578	0.0162433	0.00303376	0.00150583	0.00269128	0.00730943	0.012271
	Storage	TAG	TAG	Not used	TAG (16:0/16:0/18:0)	0.021066	0.0667792	0.0434129	0.120852	0.0172414	0.100452	0.102214	0.0360927	0.228393	0.0326167	0.029916	0.0350171	0.0250612	0.0821555	0.0128162	0.0156478	9.58119e-05	0.0419285	0.0204579	0.0349027	0.0157887	0.0247451	0.0300036	0.0499637	0.398325	0.0134052	0.0110866	0.139785	0.205818	0.522718	0.0578979	0.022249	0.0150819	0.0151616	0.00450621	0.00974468	0.013656	0.264209	0.0719561	0.00394238	0.00273041	0.00332107	0.00796389	0.00902768
	Storage	TAG	TAG	Not used	TAG (16:0/16:0/18:1)	0.0257163	0.0669718	0.043581	0.120852	0.0232693	0.101258	0.102214	0.0366934	0.229522	0.0522843	0.0483651	0.0466296	0.0416427	0.119848	0.0129694	0.0156478	0.0126962	0.0419285	0.0204579	0.0349694	0.0165492	0.0256748	0.0300036	0.0499637	0.401072	0.0134766	0.0147174	0.142823	0.211022	0.536089	0.0581586	0.0224168	0.0212455	0.022062	0.00687745	0.00982308	0.0168572	0.269047	0.110168	0.00397067	0.00273041	0.00384598	0.00796389	0.013417
	Storage	TAG	TAG	Not used	TAG (16:0/16:0/18:3)	0.0330416	0.0812339	0.059113	0.130383	0.028043	0.108415	0.115648	0.040946	0.246436	0.0252235	0.053786	0.0517969	0.0296156	0.127074	0.0139577	0.0166318	0.0135158	0.0460568	0.0221595	0.0374524	0.0180087	0.0277967	0.0322002	0.0529786	0.438545	0.0145168	0.0160926	0.152618	0.222345	0.556483	0.0636058	0.0253086	0.0178521	0.0259124	0.00697347	0.0117602	0.0225654	0.303165	0.117872	0.00422872	0.00291822	0.00409771	0.00849781	0.0144896
	Storage	TAG	TAG	Not used	TAG (16:0/16:0/18:4)	0.0349636	0.0864845	0.0626553	0.113083	0.0383051	0.13075	0.0991867	0.0287006	0.141244	0.175543	0.171335	0.0812531	0.0822556	0.256546	0.0196457	0.0083963	0.00671171	0.0316266	0.00699694	0.0195121	0.00606923	0.0119355	0.0164144	0.0135297	0.473258	0.0162549	0.0139265	0.0987558	0.124721	0.386042	0.132961	0.0468778	0.0656396	0.0523527	0.0147118	0.0205679	0.0399028	0.252225	0.2491	0.0056681	0.00463049	0.00430752	0.00868859	0.0137326
	Storage	TAG	TAG	Not used	TAG (16:0/16:0/ARA)	0.0257163	0.0669718	0.043581	0.120852	0.0232693	0.101258	0.102214	0.0366934	0.229522	0.0522843	0.0483651	0.0474573	0.0416427	0.119848	0.0129694	0.0156478	0.0126962	0.0419285	0.0204579	0.0349694	0.0165492	0.0256748	0.0300036	0.0499637	0.401072	0.0134766	0.0147174	0.142823	0.211022	0.536089	0.0581586	0.0224168	0.0212455	0.022062	0.00687745	0.00982308	0.0168572	0.269047	0.110168	0.00397067	0.00273041	0.00384598	0.00796389	0.013417
	Storage	TAG	TAG	Not used	TAG (16:0/16:0/DHA)	0.0469838	0.0901095	0.0875095	0.132772	0.064007	0.178074	0.179792	0.0373462	0.21981	0.0554296	0.0502527	0.0400355	0.0620807	0.186006	0.0131677	0.0107974	0.00744574	0.0343213	0.0116183	0.032389	0.00782481	0.0172263	0.0114884	0.00950534	0.392989	0.0115331	0.00871177	0.0846739	0.12357	0.371551	0.067316	0.0260216	0.0330808	0.0842627	0.0228572	0.0384225	0.0307509	0.178457	0.182861	0.00622548	0.00414805	0.00277291	0.00657344	0.0109092
	Storage	TAG	TAG	Not used	TAG (16:0/16:0/DPA)	0.0129893	0.0337744	0.023937	0.0966903	0.0152167	0.0892512	0.106018	0.0174583	0.316502	0.0114576	0.00876366	0.0170411	0.0165341	0.0582349	0.00465241	0.0145195	0.00966257	0.0320611	0.0286428	0.0331481	0.0184532	0.0151379	0.0318857	0.075882	0.104293	0.00420563	0.00560993	0.0664275	0.157863	0.326319	0.0323543	0.0121711	0.00549618	0.0167742	0.00503593	0.00653362	0.00425072	0.104358	0.0492112	0.00200615	0.000981511	0.00231119	0.00252702	0.00666415
	Storage	TAG	TAG	Not used	TAG (16:0/16:1/16:1)	0.0229256	0.046055	0.0343105	0.138419	0.0281795	0.101844	0.0898114	0.052407	0.184901	0.0209429	0.0168153	0.0435339	0.0442957	0.128947	0.0211368	0.0139005	0.0124168	0.0383858	0.0177293	0.0309535	0.014488	0.0405441	0.0427116	0.0307093	0.439355	0.0123295	0.0149667	0.214309	0.337495	0.79406	0.0424059	0.0162589	0.0192033	0.0186972	0.00577069	0.0100768	0.013147	0.440186	0.111486	0.00482211	0.00274064	0.004295	0.0109215	0.0169958
	Storage	TAG	TAG	Not used	TAG (16:0/16:1/17:1)	0.00483711	0.00509765	0.00338648	0.0403097	0.0066232	0.019167	0.0168073	0.0256711	0.0458515	0.0068475	0.00368628	0.0215298	0.00948009	0.0308097	0.00587422	0.00390924	0.00411333	0.00679314	0.00786176	0.0100263	0.00636487	0.0204065	0.0265129	0.0132976	0.0907195	0.00340022	0.00522694	0.115603	0.169241	0.356571	0.00627356	0.00159932	0.00299332	0.00478466	0.00162558	0.0033999	0.000901314	0.246425	0.0119902	0.00231814	0.00117584	0.00265112	0.00683527	0.00982246
	Storage	TAG	TAG	Not used	TAG (16:0/16:1/18:1)	0.0257163	0.0669718	0.043581	0.120852	0.0232693	0.101258	0.102214	0.0366934	0.229522	0.0522843	0.0483651	0.0466296	0.0416427	0.119848	0.0129694	0.0156478	0.0126962	0.0419285	0.0204579	0.0349694	0.0165492	0.0256748	0.0300036	0.0499637	0.401072	0.0134766	0.0147174	0.142823	0.211022	0.536089	0.0581586	0.0224168	0.0212455	0.022062	0.00687745	0.00982308	0.0168572	0.269047	0.110168	0.00397067	0.00273041	0.00384598	0.00796389	0.013417
	Storage	TAG	TAG	Not used	TAG (16:0/16:1/18:4)	0.00662431	0.0164282	0.0181727	0.0728009	0.0285427	0.0935546	0.0572652	0.00977873	0.0921725	0.0071012	0.00792484	0.00630835	0.0120858	0.0433967	0.00460602	0.00211531	0.00142947	0.00573284	0.00367119	0.00980057	0.00213704	0.0045025	0.00659983	0.00592902	0.0394028	0.00111297	0.00111727	0.0247269	0.0300263	0.100488	0.0106236	0.005232	0.00707878	0.00919639	0.00182644	0.00434098	0.00446667	0.0467032	0.038156	0.000674277	0.000526632	0.000617461	0.00114611	0.00319589
	Storage	TAG	TAG	Not used	TAG (16:0/16:1/DHA)	0.015969	0.0380373	0.0487936	0.158762	0.0625015	0.206814	0.184804	0.0253109	0.237543	0.00652599	0.00791442	0.00901091	0.0233216	0.079178	0.00804613	0.00439275	0.00312348	0.0131067	0.00788699	0.0225688	0.00370234	0.00675895	0.0051479	0.00837705	0.0582264	0.00155734	0.00139666	0.0245383	0.0349091	0.0987665	0.0157191	0.00786941	0.0107176	0.0135961	0.00339601	0.00672246	0.00746405	0.0709187	0.0763809	0.00130328	0.00128933	0.00157259	0.00317158	0.00584278
	Storage	TAG	TAG	Not used	TAG (16:0/17:0/18:0)	1.16539	1.19509	1.19738	3.48693	3.31025	3.30495	5.43204	0.0306335	4.84391	1.47229	1.5257	1.59233	1.73543	1.61239	1.67733	0.957041	0.972845	0.929505	1.47983	1.59625	1.57605	3.00604	3.94252	3.0101	0.0265963	0.541612	0.537636	22.4172	22.5449	22.361	1.00016	1.01627	0.998144	1.60588	1.94485	2.0784	1.51448	0.0251658	1.72681	0.464524	0.433068	0.491323	1.26921	1.30104
	Storage	TAG	TAG	Not used	TAG (16:0/18:0/18:0)	0.0086417	0.0121347	0.0204431	0.0659007	0.0119028	0.0233271	0.0691861	0.016336	0.0288236	0.00726973	0.00688794	0.00811798	0.00881423	0.012598	0.00393033	0.00289361	0.00240384	0.00632358	0.0080939	0.00844996	0.00599735	0.0102986	0.0125801	0.0178879	0.129799	0.00195459	0.00256607	0.0709658	0.0833282	0.0958908	0.00838425	0.00554959	0.00340879	0.00632816	0.00588796	0.00492154	0.0188517	0.0728023	0.0133407	0.00135751	0.000844915	0.00139197	0.00371649	0.00538695
	Storage	TAG	TAG	Not used	TAG (16:0/18:0/18:1)	0.0153303	0.0347559	0.0290063	0.205662	0.0274289	0.0948864	0.0394567	0.018457	0.0891037	0.0107249	0.00898151	0.0140843	0.0143083	0.0314768	0.00575225	0.00443648	0.00376766	0.012293	0.0101939	0.0210691	0.00762269	0.0168904	0.0166479	0.0249304	0.0717367	0.00226952	0.00341864	0.0730174	0.0993201	0.208805	0.0205284	0.0096006	0.00890635	0.0255584	0.00819376	0.00998603	0.0230446	0.150989	0.051171	0.00190467	0.00102629	0.00186739	0.00367397	0.0077928
	Storage	TAG	TAG	Not used	TAG (16:0/18:0/20:0)	0.00412326	0.00624702	0.00657434	0.0270341	0.00629222	0.00802824	0.0322204	0.00146355	0.038259	0.00255045	0.00242748	0.00102076	0.00517061	0.00123932	0.000503366	0.00104799	0.000373767	0.00234652	0.00249753	0.00189827	0.00578374	0.000426665	0.00585798	0.0141927	0.0365912	0.000486772	0.00221333	0.0555819	0.00798928	0.0629611	0.00401307	0.00263021	0.00105388	0.00912419	0.00146886	0.00219085	0.00813859	0.00116474	0.0969554	6.7113e-05	0.00015916	9.90439e-05	0.000297603	0.00325617
	Storage	TAG	TAG	Not used	TAG (16:0/18:0/DHA)	0.00349373	0.00706458	0.00566575	0.00649044	0.00262971	0.00790318	0.0107691	0.00296146	0.11563	0.00439564	0.00426477	0.00362122	0.00608072	0.0159115	0.00121757	0.00104764	0.000846853	0.00357765	0.00905054	0.00360365	0.000804762	0.00181099	0.00107125	0.00137267	0.0211802	0.000597782	0.000660228	0.00942907	0.0132791	0.033919	0.00652793	0.00304592	0.00373755	0.0151469	0.00371614	0.00627885	0.00432843	0.0271181	0.0271872	0.000627466	0.000439037	0.000291631	0.000574851	0.001064
	Storage	TAG	TAG	Not used	TAG (16:0/18:1/18:2)	0.0140986	0.072312	0.047399	0.307509	0.019873	0.262935	0.287644	0.0323344	0.851226	0.0127808	0.00845187	0.0247166	0.0146631	0.0506004	0.00779292	0.0441055	0.0306131	0.0907321	0.102089	0.108037	0.0572416	0.0268513	0.0498404	0.212871	0.114348	0.00557021	0.00698851	0.0990361	0.221487	0.582714	0.0738043	0.0260901	0.0096784	0.0151083	0.00483962	0.0080208	0.00450728	0.184142	0.0505349	0.00218665	0.00132687	0.00297194	0.00571149	0.0094316
	Storage	TAG	TAG	Not used	TAG (16:0/18:1/18:3)	0.0398903	0.0854128	0.0599781	0.180018	0.0745072	0.175203	0.215292	0.108409	0.328323	0.0737065	0.0708504	0.0916386	0.0682955	0.155219	0.0369983	0.0318884	0.0285267	0.0593235	0.0511672	0.0748662	0.0425658	0.0756711	0.0816119	0.111066	0.789048	0.0223312	0.01996	0.361318	0.604868	1.01118	0.0748001	0.0341587	0.0399384	0.0459412	0.0333753	0.0467879	0.038554	0.351178	0.132401	0.0100139	0.00837719	0.0113263	0.0285276	0.0285434
	Storage	TAG	TAG	Not used	TAG (16:0/18:1/18:4)	0.00978942	0.0281314	0.0232696	0.081444	0.0218465	0.0883007	0.0563169	0.013326	0.124859	0.0110839	0.0117562	0.0118416	0.0151503	0.0539215	0.00430175	0.00526724	0.00370374	0.0143714	0.00838342	0.0164816	0.00657507	0.00970446	0.0162934	0.0215621	0.0509086	0.00227064	0.00280303	0.0515896	0.0622887	0.164321	0.0374881	0.0178657	0.0235111	0.0327147	0.00801739	0.0129151	0.0120765	0.100991	0.104319	0.00126225	0.000780741	0.00101907	0.00190467	0.00460732
	Storage	TAG	TAG	Not used	TAG (16:0/18:1/20:1)	0.0035854	0.0117688	0.00772329	0.134453	0.0134239	0.0603868	0.0313145	0.0116012	0.090906	0.00273099	0.00147363	0.00742719	0.00356364	0.0119098	0.00210302	0.00462228	0.00323434	0.010464	0.00999497	0.016635	0.00666995	0.0130772	0.0118512	0.0271796	0.0359075	0.00155867	0.00211222	0.0372756	0.0663325	0.14916	0.00950872	0.00307545	0.00137093	0.00623842	0.00149363	0.00269377	0.000675452	0.052582	0.00786829	0.000732255	0.000365733	0.00107198	0.00183784	0.00290535
	Storage	TAG	TAG	Not used	TAG (16:0/18:1/DHA)	0.012241	0.0358725	0.0360912	0.100934	0.0345285	0.129967	0.0847356	0.0124462	0.17913	0.00435463	0.00549456	0.00616844	0.00942706	0.037892	0.00328278	0.00661445	0.00478147	0.0194396	0.0122063	0.0268328	0.00626424	0.00890794	0.00578081	0.0120457	0.0412369	0.00118428	0.000999929	0.0249125	0.0376358	0.100377	0.0417098	0.0193812	0.0290506	0.0635655	0.0150887	0.0295383	0.017852	0.120216	0.147828	0.00180839	0.00156667	0.00132889	0.00362227	0.00665577
	Storage	TAG	TAG	Not used	TAG (16:0/18:2/18:2)	0.014174	0.018441	0.0163971	0.0591661	0.0512379	0.0739447	0.113079	0.0717154	0.0988001	0.0214222	0.0224853	0.0441813	0.0266528	0.035371	0.0240289	0.0162406	0.0158305	0.0173951	0.0307093	0.0398968	0.0260166	0.0499963	0.0516082	0.0611021	0.387976	0.00885459	0.00524255	0.218495	0.393846	0.547684	0.0166414	0.0117419	0.018693	0.0238791	0.0264979	0.0369648	0.0216968	0.0821311	0.0222328	0.00604321	0.00564678	0.00748031	0.0205637	0.0151264
	Storage	TAG	TAG	Not used	TAG (16:0/18:2/DHA)	0.0036057	0.00974945	0.00916793	0.0322313	0.0123681	0.0365605	0.0405581	0.00590866	0.0872445	0.00171944	0.00197887	0.00207295	0.00320104	0.0133976	0.00118639	0.00219937	0.00186404	0.00660843	0.00471134	0.00767127	0.00219685	0.00244276	0.00185776	0.00390442	0.0222015	0.000554068	0.000515434	0.0074767	0.0131797	0.0314996	0.00608838	0.00287424	0.00304119	0.00379788	0.000942236	0.00147156	0.00200663	0.0166071	0.0226774	0.0003276	0.000372572	0.000253244	0.000673947	0.00193764
	Storage	TAG	TAG	Not used	TAG (16:0/18:4/DHA)	0.00855698	0.020249	0.028012	0.122443	0.0559762	0.15044	0.0864202	0.00983071	0.104428	0.00895556	0.0100462	0.00868008	0.0109587	0.0494365	0.00356176	0.00219455	0.00169118	0.00725547	0.00370828	0.0141832	0.00177853	0.0030545	0.00239457	0.00426427	0.0297925	0.000721137	0.000521752	0.0107671	0.0187676	0.0521491	0.0232884	0.00942237	0.0174684	0.0177507	0.00441609	0.00831457	0.00976731	0.0469078	0.0617721	0.000752128	0.000758111	0.000789401	0.00192766	0.00362514
	Storage	TAG	TAG	Not used	TAG (16:0/DHA/DHA)	0.00388474	0.00835311	0.0125899	0.0457369	0.0201134	0.0566633	0.0474014	0.00691777	0.0790001	0.00146401	0.00172966	0.00243719	0.00380577	0.0169636	0.00173335	0.00164667	0.00121443	0.00518935	0.00313365	0.0130086	0.00159546	0.00251985	0.00136906	0.00321544	0.014766	0.000383348	0.00025329	0.00876761	0.0109344	0.0258028	0.00828805	0.00352082	0.00513649	0.0145806	0.00419275	0.00698299	0.00643468	0.031135	0.0419764	0.00112917	0.00117712	0.00109297	0.0032147	0.00467801
	Storage	TAG	TAG	Not used	TAG (16:1/18:1/18:1)	0.0140986	0.0790338	0.0502453	0.325781	0.019873	0.27477	0.302659	0.0323344	0.930795	0.0127808	0.00845187	0.0288541	0.0146631	0.0506004	0.00779292	0.0465127	0.0325011	0.0970706	0.109643	0.113703	0.0615605	0.0319779	0.0498404	0.233089	0.114348	0.00557021	0.00698851	0.122034	0.243488	0.565632	0.0815014	0.0280499	0.0096784	0.0151083	0.00483962	0.00905466	0.00450728	0.188152	0.0505349	0.00246698	0.00132687	0.00334919	0.00548206	0.0094316
	Storage	TAG	TAG	Not used	TAG (16:1/18:1/18:2)	0.0113622	0.0395592	0.027418	0.12169	0.00933851	0.109303	0.127842	0.0192544	0.378462	0.0195741	0.00171309	0.0120366	0.0193743	0.0604134	0.00597513	0.0189501	0.0128631	0.04012	0.0406847	0.0441146	0.0251662	0.0187655	0.0385022	0.0950199	0.0729204	0.0037854	0.00428456	0.0674096	0.1668	0.380741	0.0415865	0.0161787	0.00841439	0.0135065	0.00497821	0.00863684	0.00513615	0.135004	0.0147989	0.00156323	0.000778138	0.00205311	0.00269342	0.00538121
	Storage	TAG	TAG	Not used	TAG (16:1/18:1/DPA)	0.0131259	0.0358725	0.0360912	0.100934	0.0345285	0.129967	0.0847356	0.0124462	0.17913	0.00435463	0.00549456	0.00616844	0.00942706	0.0349679	0.00328278	0.00661445	0.00478147	0.0194396	0.0122063	0.0268328	0.00699008	0.0088387	0.00531443	0.0120457	0.0412369	0.00110241	0.000869151	0.0249125	0.0391206	0.0934899	0.0417098	0.0193812	0.0290506	0.0635655	0.0150887	0.0295383	0.017852	0.120216	0.147828	0.00176869	0.00154912	0.00132889	0.00362227	0.00607732
	Storage	TAG	TAG	Not used	TAG (18:0/18:0/20:0)	0.0486068	0.0703807	0.0573589	0.201276	0.176364	0.187865	0.282433	0.416495	0.40377	0.12128	0.127622	0.23095	0.167281	0.289278	0.126702	0.048388	0.042832	0.0687757	0.0827117	0.0893947	0.0925835	0.30466	0.282092	0.215223	1.98797	0.0497923	0.0523936	2.32475	2.40889	2.98435	0.0642022	0.041171	0.0491457	0.0829266	0.084223	0.0965515	0.0378177	0.50941	0.154085	0.0377334	0.0369544	0.0457094	0.117866	0.150486
	Storage	TAG	TAG	Not used	TAG (18:0/18:1/18:2)	0.00307472	0.007069	0.0105734	0.0474661	0.00942674	0.0805682	0.0699976	0.0218118	0.122455	0.0065878	0.00274641	0.0161312	0.00581162	0.0244927	0.00435074	0.00605927	0.00515644	0.012972	0.0121143	0.0126416	0.006901	0.0256136	0.0268365	0.0398235	0.0605208	0.00324354	0.00430436	0.0777964	0.166287	0.344737	0.0194567	0.00268852	0.000616492	0.00345356	0.000892555	0.00219901	0.000293372	0.109506	0.0160667	0.00150712	0.000730008	0.00255404	0.00333279	0.00599187
	Storage	TAG	TAG	Not used	TAG (18:1/18:1/18:1)	0.00618489	0.0380195	0.0245597	0.231852	0.0150174	0.156629	0.149891	0.00524898	0.400223	0.00266688	0.000922888	0.00381975	0.0012381	0.00642072	0.00104059	0.0225994	0.015205	0.045397	0.0442304	0.0572432	0.0295906	0.00542007	0.00710087	0.125306	0.0147744	0.000809393	0.000986091	0.016986	0.0267318	0.0754595	0.0371965	0.0124376	0.00266606	0.00812583	0.00259229	0.00431116	0.000609236	0.0378649	0.00286659	0.000301685	0.000229054	0.00038935	0.0005451	0.00165685
	Storage	TAG	TAG	Not used	TAG (18:1/18:1/18:2)	0.00582472	0.0390487	0.0264378	0.173628	0.00645492	0.154417	0.178005	0.0144893	0.523229	0.00376129	0.00111013	0.0111185	0.00309694	0.0148698	0.00301205	0.0285206	0.0191372	0.0576522	0.0566848	0.0671647	0.0373142	0.0145588	0.0278084	0.155972	0.06115	0.00314591	0.00367712	0.0496347	0.139752	0.302935	0.0447487	0.0150115	0.00232238	0.003932	0.00157166	0.00273041	0.00033898	0.0623814	0.0127958	0.00100859	0.000566346	0.00187895	0.00241792	0.00424919
	Storage	TAG	TAG	Not used	TAG (18:1/18:2/18:2)	0.0129893	0.0337744	0.023937	0.0966903	0.0152167	0.0892512	0.106018	0.0174583	0.316502	0.0114576	0.00876366	0.0170411	0.0165341	0.0582349	0.00465241	0.0145195	0.00966257	0.0320611	0.0286428	0.0331481	0.0184532	0.0151379	0.0318857	0.075882	0.104293	0.00420563	0.00560993	0.0664275	0.157863	0.326319	0.0323543	0.0121711	0.00549618	0.0167742	0.00503593	0.00653362	0.00425072	0.104358	0.0492112	0.00200615	0.000981511	0.00231119	0.00252702	0.00666415
	Storage	TAG	TAG	Not used	TAG (18:1/18:3/DHA)	0.00080243	0.00228812	0.00149708	0.00731875	0.00320628	0.00932652	0.00675048	0.000950178	0.0190422	0.00026898	0.000412618	0.000477701	0.000796142	0.00228932	0.000191951	0.000501929	0.000461355	0.0019183	0.00132579	0.0024992	0.0007087	0.000726931	0.000511429	0.00176801	0.00275048	4.69238e-05	6.58427e-05	0.000242587	0.0017905	0.00427276	0.00263145	0.00108354	0.00194336	0.00458714	0.00132583	0.00245753	0.000736222	0.00833444	0.00595837	8.10857e-05	6.60772e-05	6.29307e-05	0.000141251	0.000329423
	Storage	TAG	TAG	Not used	TAG (18:1/DHA/DHA)	0.00137473	0.00222015	0.00387201	0.00901553	0.00523577	0.0125123	0.0195869	0.00214786	0.030452	0.000219681	0.000230497	0.000559057	0.000878577	0.00368816	0.000379967	0.000522847	0.000388868	0.00159956	0.000786323	0.00242112	0.000491689	0.000582147	0.000452569	0.000521811	0.00401427	9.69381e-05	6.41264e-05	0.00208471	0.0026651	0.00856698	0.00269849	0.00126333	0.00198316	0.00359059	0.000942139	0.00166706	0.00191228	0.000559322	0.0150774	0.000192389	0.000188401	0.000134092	0.000384415	0.000704907
	Storage	TAG	TAG	Not used	TAG (18:2/ARA/DHA)	0.00388474	0.00835311	0.0125899	0.0457369	0.0201134	0.0566633	0.0474014	0.00691777	0.0790001	0.00146401	0.00172966	0.00243719	0.00380577	0.0169636	0.00173335	0.00164667	0.00121443	0.00518935	0.00313365	0.0130086	0.00159546	0.00251985	0.00136906	0.00321544	0.014766	0.000383348	0.00025329	0.00876761	0.0109344	0.0258028	0.00828805	0.00352082	0.00513649	0.0145806	0.00419275	0.00698299	0.00643468	0.031135	0.0419764	0.00112917	0.00117712	0.00109297	0.0032147	0.00467801
	Storage	TAG	TAG	Not used	TAG (18:4/18:5/DHA)	0.00331323	0.00567383	0.00881344	0.0651469	0.0342301	0.0798392	0.0350716	0.0051236	0.0610546	0.000311102	0.000560674	0.000449	0.00202461	0.0102397	0.000814052	0.000829763	0.000574935	0.00345885	0.00225548	0.00803571	0.000533516	0.000845619	0.000664075	0.00267838	0.00716428	0.000216733	8.31986e-05	0.00448934	0.00639964	0.0165986	0.00232466	0.000771072	0.00165156	0.00172333	0.000402236	0.000862366	0.000775076	0.00348011	0.0034936	0.000149353	0.000126803	0.000232387	0.000396688	0.000912875
	Membrane	sphingolipids	H-Cer	Other ML	H-Cer (d17:2/17:0-OH)	0.0053715	0.0076518	0.00654948	0.0148265	0.0104232	0.0167642	0.0218672	0.010101	0.0166266	0.000523821	0.000557593	0.000461357	0.000356541	0.00045321	0.000459671	4.0491e-05	3.04091e-05	4.46129e-05	2.22592e-05	0.000218921	2.26638e-05	2.48134e-05	6.63427e-05	4.63671e-05	1.96449e-05	0.000129569	2.29778e-05	0.000307521	0.000173181	0.000344381	7.56908e-05	7.20015e-05	6.91858e-05	5.17007e-05	4.46749e-05	1.99758e-05	6.6984e-05	9.88025e-05	0.000251435	2.95737e-05	5.19875e-05	4.54184e-05	9.94509e-05	6.3249e-05
	Membrane	sphingolipids	Ceramide	Other ML	Cer (d18:0/28:0)	0.000878973	0.000714168	0.00080609	0.00237224	0.00191092	0.00181612	0.00437344	0.000722611	0.00264515	0.000338943	0.000111519	0.000341003	0.000408536	0.000264953	0.000169504	0.00047853	0.000795316	0.000669194	0.000785618	0.00105686	0.00100728	0.000647305	0.000904673	0.00173877	8.98052e-05	6.8751e-05	0.000202205	0.00226118	0.00401272	0.00760841	0.000567681	0.000640013	0.00128122	0.00100879	0.00159553	0.00147647	0.000200952	0.000339634	0.00225424	0.000101396	4.85217e-05	5.91495e-05	0.000192874	0.000246972
	Membrane	sphingolipids	Ceramide	Other ML	Cer (d18:2/16:1-OH)	0.000400421	0.000438703	0.000488692	0.000800632	0.000712251	0.00114555	0.00284273	0.0011655	0.00115253	0.00014174	0.000133203	4.61357e-05	0.000133703	0.000209174	0.000137901	0.00029448	0.000360231	0.000343519	0.000373169	0.000385	0.000218244	0.000399172	0.000379962	0.00055061	0.000252577	0.000277648	0.000303307	0.00284909	0.000802544	0.00144159	0.00307494	0.00328007	0.00422802	0.00693546	0.00430794	0.0035609	0.00541025	0.00648391	0.0164733	0.00261939	0.00259938	0.00401372	0.00632869	0.00512016
	Membrane	sphingolipids	Phytoceramide	Other ML	Cer (t18:0/16:0)	0.0156262	0.0142834	0.0256941	0.0192745	0.026058	0.0237493	0.0677883	0.024864	0.043456	0.00955203	0.00929322	0.00641888	0.0141131	0.0139449	0.0100553	0.0117792	0.0126315	0.0160606	0.014403	0.0143431	0.0109122	0.0199586	0.0174903	0.0231836	0.00916761	0.0107093	0.0110293	0.0678355	0.0591349	0.0961063	0.0189227	0.0212004	0.0128122	0.0145014	0.0111687	0.00955363	0.0121087	0.0175992	0.0312126	0.00726669	0.00797142	0.00813306	0.0198902	0.0237937
	Membrane	sphingolipids	Phytoceramide	Other ML	Cer (t18:0/18:0)	0.00263692	0.00234655	0.00428235	0.00326183	0.00399555	0.00405135	0.0113709	0.0032634	0.00793545	0.00138658	0.0016418	0.00140413	0.0017827	0.00244036	0.000976801	0.00040491	0.00039298	0.000535355	0.000497558	0.000452941	0.000411306	0.000534027	0.000530741	0.000623058	0.000205804	0.00029087	0.000422791	0.00208029	0.0050687	0.00164182	0.00165574	0.00180004	0.00128122	0.00138709	0.00111687	0.00104221	0.000875945	0.0019143	0.00294786	0.00070977	0.000797142	0.000887243	0.00204929	0.00271067
	Membrane	sphingolipids	Phytoceramide	Other ML	Cer (t18:0/22:0-OH)	0.0021486	0.00147935	0.00201523	0.00385489	0.00208464	0.00447045	0.0100589	0.0037296	0.00755757	0.000234179	0.000133203	0.000310914	0.000226552	0.000188256	0.000192487	0.00077301	0.000935666	0.00111532	0.00216045	0.00422745	0.00243426	0.00436931	0.00361869	0.00260815	6.54829e-05	4.8919e-05	8.18009e-05	0.00497461	0.00633588	0.00800885	0.000614988	0.000560012	0.000602173	0.00201759	0.00159553	0.00104221	0.000618314	0.00111153	0.00199414	3.88683e-05	2.94596e-05	4.11934e-05	9.34235e-05	0.000108427
	Membrane	sphingolipids	Phytoceramide	Other ML	Cer (t18:0/24:0-OH)	0.0136729	0.00867204	0.0125448	0.0226846	0.0144187	0.0293373	0.0612281	0.0177933	0.0472348	0.00135577	0.000960299	0.00135398	0.00167129	0.00145027	0.00123537	0.00522702	0.00612861	0.00736113	0.0151886	0.0279314	0.0163683	0.0231951	0.0259339	0.0168081	0.000364834	0.000330534	0.00057904	0.036179	0.0426616	0.0500553	0.00458876	0.00372008	0.00448426	0.0121686	0.0113283	0.00816401	0.0031431	0.00595902	0.0133521	0.000287288	0.000203618	0.000151042	0.00064191	0.000963794
	Membrane	sphingolipids	Phytoceramide	Other ML	Cer (t18:0/26:0-OH)	0.0085944	0.0059684	0.00775862	0.0157161	0.0119867	0.0188597	0.0360809	0.0111888	0.0285298	0.00104764	0.000585473	0.00115339	0.00111419	0.00153394	0.000976801	0.00360738	0.00467833	0.00535355	0.00949288	0.0165323	0.0103246	0.0129461	0.012786	0.012751	0.00031806	0.000273682	0.000542276	0.0235163	0.0283003	0.0348385	0.00312225	0.00344007	0.00525299	0.00800731	0.00733945	0.00642699	0.00206105	0.00367422	0.00910368	0.00022814	0.000160295	0.000132453	0.00060876	0.000804166
	Membrane	sphingolipids	Phytoceramide	Other ML	Cer (t18:1/26:0-OH)	0.00102547	0.00076518	0.00080609	0.00252051	0.00156348	0.00405135	0.00656016	0.0020979	0.00547924	0.000400569	0.00016418	0.000682006	0.000519956	0.000474127	0.000137901	0.00051534	0.000514616	0.000579968	0.00170217	0.00279314	0.00176274	0.00285893	0.00186966	0.00188366	0.000140321	0.000111059	0.000303307	0.00348222	0.00401272	0.00480531	0.000458876	0.000344007	0.000525299	0.00145014	0.0013562	0.000851141	0.000283394	0.000741019	0.00156063	0.000126745	8.05806e-05	0.000105624	0.000238079	0.000361423
	Membrane	sphingolipids	Phytoceramide	Other ML	Cer (t18:0/28:0)	0.00170911	0.00137732	0.0015618	0.00459622	0.00312695	0.00363224	0.0069975	0.0013986	0.00510136	0.000283479	6.19548e-06	0.00059174	0.000408536	0.00039743	0.000316024	0.00088344	0.00145028	0.00107071	0.00202951	0.00211372	0.00243426	0.000809132	0.00120623	0.00420202	0.000112256	0.000108415	0.00024816	0.00388924	0.00464631	0.00880974	0.00127728	0.00112002	0.00320305	0.00189149	0.0023933	0.00234498	0.000386446	0.000432261	0.00303456	0.000101396	6.41179e-05	8.66118e-05	0.000265202	0.000301186
	Membrane	sphingolipids	Phytoceramide	Other ML	Cer (t18:0/30:0)	0.00112313	0.00107125	0.00115875	0.00311357	0.00330067	0.00279403	0.00502945	0.000582751	0.00396772	0.00030813	0.000173473	0.000461357	0.000445676	0.000230091	0.000209725	0.00058896	0.00102923	0.000892258	0.0014403	0.00173627	0.00176274	0.000593363	0.0010253	0.00289795	0.000121611	7.27174e-05	0.000211396	0.00321088	0.00371705	0.00961063	0.000946136	0.000840017	0.00192183	0.00138709	0.00183486	0.00182387	0.000360683	0.000308758	0.00268775	0.000101396	5.45869e-05	6.1262e-05	0.000235066	0.000277091
	Membrane	sphingolipids	Phytoceramide	Other ML	Cer (t18:1/18:0)	0.0195327	0.0173441	0.028717	0.0311357	0.0364811	0.0335284	0.0940289	0.033411	0.0755757	0.0117089	0.0117714	0.0130383	0.0141131	0.0174311	0.0106299	0.0066258	0.00701749	0.00803032	0.00851086	0.00830392	0.00780643	0.0113278	0.0144748	0.0202856	0.0031806	0.00343755	0.0033088	0.0723579	0.0802544	0.0800885	0.00709602	0.00680014	0.00717482	0.00693546	0.00797766	0.00816401	0.0066984	0.00833646	0.00867017	0.00185892	0.00199285	0.00211248	0.00572596	0.0063249
	Membrane	aminolipids	DGTS	Other ML	DGTS (14:0/16:0)	0.00463472	0.00658484	0.007548	0.00684146	0.00617242	0.00873212	0.0135423	0.00681172	0.00918868	0.00134548	0.0177357	0.000533508	0.00161796	0.00133001	0.0011442	0.00172413	0.00121515	0.00195098	0.0041447	0.00654268	0.00483115	0.00497238	0.00606941	0.0126958	0.167434	0.067292	0.207778	0.000792554	0.000833859	0.000742348	0.000151703	0.000210626	0.000239338	0.000268585	0.000146393	0.000156734	0.000460315	0.000514818	0.000175931	6.0684e-05	2.69268e-05	6.34232e-05	0.000230447	0.000226874
	Membrane	aminolipids	DGTS	Other ML	DGTS (14:0/18:1)	0.0305532	0.0493045	0.039951	0.0446681	0.0435721	0.064376	0.108232	0.0683234	0.062606	0.0122549	0.0617175	0.00862763	0.0198952	0.0216012	0.0145042	0.00528196	0.00329653	0.0051145	0.00833245	0.0110907	0.0139181	0.0164955	0.0146346	0.0241285	0.348813	0.159008	0.506596	0.00195646	0.00286958	0.00196713	0.000437553	0.000737612	0.000432566	0.000953724	0.000693421	0.000591158	0.000959389	0.000882503	0.00094644	0.000104325	8.30739e-05	0.000327879	0.000765474	0.000299951
	Membrane	aminolipids	DGTS	Other ML	DGTS (15:0/16:0)	0.00879482	0.0133863	0.0148918	0.0190277	0.0169203	0.0178002	0.0132692	0.0116282	0.016547	0.000874479	0.00109859	0.000713022	0.000864391	0.0010699	0.00123175	0.00163046	0.00119047	0.00212882	0.00195122	0.0065333	0.00594436	0.00607139	0.00571992	0.0101504	0.244169	0.1229	0.312889	0.000489801	0.000719097	0.000752583	0.000584663	0.000413975	0.000398453	0.000449972	0.000601559	0.000244485	0.000940066	0.000611828	0.000657183	0.000131624	5.18696e-05	9.65902e-05	0.000397488	0.00058422
	Membrane	aminolipids	DGTS	Other ML	DGTS (15:0/18:1)	0.0404248	0.0873986	0.0643998	0.0659015	0.0590374	0.0891235	0.137267	0.0903769	0.0901708	0.00390061	0.00617015	0.00361328	0.00412041	0.00520388	0.00337104	0.00400843	0.00241272	0.00463319	0.00667358	0.00958479	0.0103379	0.0130384	0.0109182	0.0178584	0.353561	0.138017	0.452731	0.00342385	0.00483931	0.00314768	0.000688511	0.000463686	0.000413676	0.000792917	0.000636303	0.00046901	0.000670885	0.000544832	0.00082876	0.000113569	6.08105e-05	0.00012425	0.00052647	0.000603611
	Membrane	aminolipids	DGTS	Other ML	DGTS (16:0/16:0)	0.00283097	0.00534023	0.00608541	0.00713528	0.00599914	0.00843167	0.0114821	0.00536376	0.00616103	0.00100537	0.00410574	0.000615727	0.000947167	0.00103797	0.00125573	0.000633584	0.000559184	0.00111357	0.00384142	0.00491853	0.00237474	0.00425013	0.00342476	0.00923273	0.0471311	0.0153287	0.0668299	0.000370851	0.000218639	0.000379786	0.000419142	0.000321352	0.000445034	0.000615988	0.000645456	0.000655028	0.00180064	0.000643877	0.000658594	8.92477e-05	5.60354e-05	6.92829e-05	0.000177215	0.000200447
	Membrane	aminolipids	DGTS	Other ML	DGTS (16:0/18:1)	0.0268892	0.0538194	0.0400289	0.060619	0.0579317	0.0874293	0.137178	0.0698085	0.0839445	0.00419312	0.0174823	0.00296388	0.00294568	0.00383613	0.00448513	0.00825398	0.00634885	0.0101202	0.016112	0.0219829	0.0189838	0.0210392	0.0167634	0.0363349	0.440644	0.15187	0.71479	0.00324207	0.00444765	0.00259643	0.00278621	0.00156833	0.0033003	0.00707655	0.00521871	0.00518108	0.00780078	0.00155607	0.00267787	0.000187383	0.000132574	0.000147845	0.000543936	0.000774204
	Membrane	aminolipids	DGTS	Other ML	DGTS (18:1/18:1)	0.0134339	0.0234326	0.0156893	0.0372256	0.0220014	0.0397574	0.137744	0.0422274	0.0627996	0.00200593	0.00424764	0.00133849	0.00132571	0.00187572	0.00259751	0.00592333	0.00511231	0.00846942	0.00752267	0.0111331	0.0152274	0.0113671	0.0106247	0.0193014	0.850468	0.0882569	0.552455	0.00175853	0.00261832	0.0024002	0.00325379	0.00340153	0.00304137	0.00824768	0.00753863	0.00562976	2.00246e-05	0.00628599	0.00271465	0.000210215	0.000171603	0.000319955	0.000565695	0.000829905
	Others	FFA	FFA	Not used	FFA (14:0)	0.749327	0.428812	0.599007	2.67705	1.0726	3.12302	2.4588	0.0324669	1.54461	0.177114	0.11435	0.194669	0.147333	0.262786	0.168063	2.44803	3.09905	0.270298	1.51673	1.06443	0.534783	0.0081491	0.695516	2.75868	0.0930057	0.0965547	0.101235	2.2247	2.40959	2.20577	1.84424	0.825092	2.09517	2.89357	1.86223	2.51115	0.93527	0.781913	3.40534	0.148983	0.0964335	0.131269	0.363047	0.426537
	Others	FFA	FFA	Not used	FFA (14:1)	0.0748329	0.0364017	0.0453793	0.314666	0.104846	0.289791	0.230392	0.164742	0.123488	0.0707992	0.0476455	0.04556	0.0485426	0.0603502	0.0482528	0.187283	0.268464	0.0130009	0.111124	0.0797733	0.0534498	0.0412211	0.0906091	0.216626	0.009871	0.0126169	0.0115444	0.22468	0.232681	0.237501	0.176589	0.0792229	0.167373	0.375189	0.191671	0.232205	0.105923	0.0778177	0.3522	0.0675313	0.0461809	0.065525	0.17333	0.184952
	Others	FFA	FFA	Not used	FFA (16:0)	8.05567	4.40677	6.81033	24.2084	14.6381	31.9341	29.9672	19.6787	17.9982	3.64583	2.51506	3.44041	2.52727	4.38938	3.4937	15.014	15.0087	2.06853	13.4192	7.44854	4.73801	4.4906	7.80803	20.1766	1.19235	1.21967	1.04963	26.1297	30.6863	24.2113	9.37871	4.41451	11.1264	22.5241	11.99	17.1447	6.7271	5.24538	23.7084	1.91883	1.39663	1.91792	5.21918	5.7957
	Others	FFA	FFA	Not used	FFA (16:1)	3.45728	1.68133	2.49834	8.82733	4.42139	10.9501	10.3492	5.99408	6.41313	0.597577	0.396057	0.455667	0.651118	0.676632	0.663637	4.40489	5.13676	0.388563	2.32505	1.93011	1.32028	0.985375	2.16193	5.12696	0.104679	0.126347	0.12542	4.17533	4.65784	5.09846	2.17312	1.13729	2.094	3.77065	2.62206	3.53861	1.10904	0.846968	3.52892	0.221773	0.193421	0.224729	0.680714	0.762374
	Others	FFA	FFA	Not used	FFA (17:0)	0.342984	0.278366	0.309405	1.73066	0.691028	3.12083	1.68954	1.08983	1.23488	0.209179	0.149743	0.0828364	0.074432	0.1278	0.07506	2.11711	1.7084	0.253265	2.22249	1.1966	0.427598	0.507337	0.422843	3.15093	0.0870971	0.052694	0.0577219	1.41293	0.821228	1.22143	0.432463	0.205393	0.418432	1.01012	0.580821	1.0217	0.200395	0.116727	0.741474	0.0495229	0.0384841	0.0540582	0.144967	0.168307
	Others	FFA	FFA	Not used	FFA (17:1)	0.221381	0.145607	0.247524	1.05413	0.464657	2.45208	1.09052	0.671641	0.823252	0.0820627	0.0476455	0.0662691	0.0517788	0.0781002	0.0607628	0.716561	0.691497	0.0810448	0.858688	0.445401	0.181729	0.18708	0.332233	1.14221	0.0185807	0.0163277	0.0211647	0.694885	0.875977	0.814288	0.169381	0.0733545	0.192479	0.396834	0.214904	0.417968	0.077295	0.0295707	0.315126	0.0139565	0.00885134	0.012559	0.0378174	0.0554857
	Others	FFA	FFA	Not used	FFA (18:0)	2.70583	1.77555	1.93646	14.6225	5.88566	19.6345	13.9924	8.86819	6.97088	1.20809	0.728568	1.71057	0.984768	1.79844	1.52229	7.4164	5.84437	1.16097	9.62539	4.36227	3.28324	2.05154	2.72371	14.7463	0.405988	0.397209	0.224827	13.8097	17.1746	12.35	2.84272	0.990873	2.52047	8.83137	4.57339	5.53204	1.33491	1.34376	6.23827	0.551055	0.244913	0.459003	0.986089	2.07517
	Others	FFA	FFA	Not used	FFA (18:1)	6.05835	3.72582	5.10518	22.4876	11.782	29.6033	23.5921	12.8613	15.7961	0.829605	0.590859	0.332924	0.753867	0.929393	1.56375	14.1521	12.4722	1.89088	11.3438	8.82093	5.10232	3.18988	4.31511	26.1685	0.169154	0.163938	0.213764	15.4983	17.7194	15.843	5.54994	2.72292	6.36687	14.921	8.95626	13.375	3.09323	2.91817	14.6874	0.445031	0.316647	0.437762	1.13326	1.22198
	Others	FFA	FFA	Not used	FFA (18:2)	0.690895	0.322733	0.498183	1.34551	0.63527	1.34552	1.70305	0.866036	0.986667	0.158976	0.0999194	0.107994	0.119318	0.203913	0.113627	0.688387	0.819546	0.0679088	0.356608	0.300439	0.201043	0.152899	3.92869	0.713685	0.0240852	0.0292711	0.0275045	0.53673	0.6324	0.698422	0.43722	0.237141	0.454752	0.458452	0.297961	0.368555	0.289713	0.237188	1.0005	0.0594275	0.0431022	0.0552049	0.140271	0.156951
	Others	FFA	FFA	Not used	FFA (18:3)	0.47706	0.214128	0.342408	0.660799	0.405086	0.802499	1.0598	0.405519	0.668892	0.149644	0.0925684	0.0215457	0.111648	0.1491	0.0643475	0.415279	0.545062	0.0540299	0.259627	0.136279	0.114026	0.0177603	6.79568	0.417498	0.0330969	0.0348819	0.0370382	0.509583	0.29573	0.251103	0.619863	0.305155	0.560699	1.33481	0.638903	0.761631	0.478084	0.410878	1.45823	0.139565	0.102368	0.136511	0.362417	0.414293
	Others	FFA	FFA	Not used	FFA (18:4)	2.21381	0.877923	1.65016	2.04533	2.74029	4.23541	5.3758	2.15432	2.98429	2.73542	1.90582	1.28396	1.9417	2.94651	1.76927	1.95426	1.5457	0.111437	0.353578	0.365627	0.302882	0.123663	0.483249	1.10283	0.220646	0.304289	0.202027	1.992	1.20447	0.882146	2.66685	1.10032	2.51059	6.4215	3.54301	4.55121	4.43731	2.6458	9.88632	1.21556	1.03907	1.2559	3.4666	3.69905
	Others	FFA	FFA	Not used	FFA (18:5)	0.196436	0.0728034	0.121699	0.129013	0.202543	0.334375	0.399345	0.228104	0.226394	0.595357	0.381164	0.190524	0.388341	0.532502	0.339557	0.130284	0.113894	0.00692258	0.0171738	0.0219376	0.0178166	0.00412211	0.0664467	0.0571106	0.0261291	0.0333976	0.0206837	0.150559	0.0437988	0.0593752	0.1874	0.0528153	0.133898	0.360759	0.214904	0.297222	0.730009	0.357962	0.679684	0.247615	0.261692	0.25664	0.756348	0.906267
	Others	FFA	FFA	Not used	FFA (20:1)	0.0311804	0.0214128	0.0226897	0.267466	0.0548057	0.207312	0.139771	0.15207	0.0833542	0.0107808	0.00353938	0.00538437	0.0113266	0.00497002	0.0166204	0.0814273	0.0894878	0.00996176	0.0373782	0.0279206	0.146096	0.0304402	0.0634264	0.110283	0.00342582	0.00267181	0.00529118	0.178354	0.0602234	0.152679	0.100908	0.0352102	0.036822	0.0692656	0.0441424	0.0640885	0.0400789	0.0342398	0.111221	0.0144067	0.0161633	0.0234798	0.0598776	0.0591848
	Others	FFA	FFA	Not used	FFA (20:2)	0.0115367	0.00685209	0.0047442	0.121146	0.011676	0.0579583	0.027647	0.0392846	0.0123488	0.00402268	0.000639811	0.00161531	0.0055015	0.00284001	0.0017514	0.0341995	0.0813526	0.00185728	0.0101022	0.0113012	0.011759	0.00824422	0.0253706	0.0216626	0.00145162	0.00126169	0.00226078	0.0579071	0.0208044	0.0831253	0.0144154	0.00381444	0.0108792	0.0144303	0.0127781	0.00603732	0.00658439	0.0021789	0.0123579	0.00103548	0.000423325	0.000873667	0.00220602	0.00369905
	Others	FFA	FFA	Not used	FFA (20:3)	0.00202673	0.00147748	0.00136138	0.02832	0.00190629	0.0245208	0.00737253	0.00861728	0.00370463	0.000135162	1.03459e-05	0.0009112	0.00092231	0.000426001	0.000571886	0.00895701	0.0195246	0.000219496	0.00054552	0.00259263	0.00299319	0.000919548	0.00543655	0.00512026	0.000104516	0.000200386	0.000673422	0.0111182	0.00985474	0.0186608	0.00201816	0.000880255	0.00225953	0.0022367	0.0022652	0.00176476	0.00127394	0.00026458	0.000865053	0.000139565	8.08166e-06	8.73667e-05	8.0362e-05	0.000850781
	Others	FFA	FFA	Not used	FFA (22:3)	0.00436525	0.00342604	0.0020627	0.0613599	0.00452743	0.0312083	0.00952285	0.0228104	0.00627729	0.00241361	0.000231421	0.00223658	0.0037216	0.001491	0.00178714	0.0162855	0.0374222	0.00077668	0.00555622	0.00525174	0.00677031	0.0044392	0.0126853	0.00886199	0.000441292	0.000734747	0.00125064	0.0347443	0.0273743	0.0441073	0.00612655	0.00190722	0.0036822	0.00678226	0.00522739	0.0030651	0.00343533	0.00311271	0.00679684	0.000495229	0.00031557	0.00065525	0.00155997	0.00314419
	Others	FFA	FFA	Not used	FFA (22:4)	0.0592427	0.0256953	0.0191831	0.220266	0.0786343	0.222916	0.245751	0.316812	0.144069	0.0353996	0.040839	0.0745528	0.0453064	0.0745502	0.03753	0.0765417	0.0764714	0.0270149	0.0899097	0.0631538	0.0356332	0.0570754	0.0875888	0.108313	0.0121936	0.0326554	0.0125064	0.602234	0.273743	0.0458037	0.0266685	0.016138	0.0451907	0.062772	0.038915	0.0631597	0.0730009	0.0202326	0.0512853	0.0148569	0.00808166	0.0191115	0.0425446	0.0314419
	Others	FFA	FFA	Not used	FFA (ARA)	0.123474	0.0653089	0.101072	0.388613	0.170374	0.50825	0.583659	0.155605	0.339591	0.00621102	0.0055541	0.00286614	0.00857586	0.00511202	0.0167991	0.199904	0.153675	0.0169519	0.146482	0.123117	0.0730837	0.0254683	0.0480228	0.366296	0.000644518	0.00048241	0.00128912	0.107012	0.113877	0.118411	0.0885467	0.0478272	0.0512998	0.32158	0.165127	0.224031	0.0441727	0.0593282	0.285838	0.00447957	0.00212432	0.00320527	0.00680714	0.0120219
	Others	FFA	FFA	Not used	FFA (DHA)	4.05345	1.64878	3.30032	2.832	3.81257	5.35	10.4444	4.43536	6.3802	2.2527	1.63356	0.869782	1.9417	4.61501	1.78714	2.6871	2.27787	0.219496	0.414191	0.498583	0.288629	0.155372	0.422843	0.886199	0.325162	0.43788	0.206837	1.4361	0.903351	0.661609	4.68501	2.05393	4.77013	10.8228	6.38903	9.1953	5.58242	4.04652	16.6832	1.12552	1.61633	1.96575	5.35747	5.17867
	Others	FFA	FFA	Not used	FFA (DPA)	0.0296214	0.0173443	0.0268151	0.0896799	0.0381257	0.167187	0.307189	0.0316812	0.174941	0.00273542	0.00598972	0.00149106	0.00728139	0.01562	0.00393171	0.00895701	0.00602009	0.0010806	0.0141431	0.0132955	0.0103336	0.00729297	0.009967	0.0163454	0.00220646	0.00274602	0.00182786	0.048642	0.0150559	0.0339287	0.075681	0.0352102	0.00418432	0.180379	0.104548	0.139323	0.0558242	0.0466906	0.185368	0.0126058	0.0138543	0.0174733	0.045696	0.0499371
	Others	FFA	FFA	Not used	FFA (EPA)	0.0623608	0.0256953	0.0453793	0.0802399	0.114377	0.142667	0.168954	0.0304139	0.0967321	0.0321814	0.0231421	0.0140822	0.0420703	0.0674502	0.0393171	0.0162855	0.0162705	0.00148582	0.0303066	0.0212729	0.00748297	0.00288548	0.0147995	0.0512026	0.000812906	0.000964819	0.000913931	0.064856	0.0213519	0.0288394	0.0281101	0.016138	0.0259428	0.0519492	0.0377534	0.0622309	0.0200395	0.0171199	0.0463421	0.00990458	0.0115452	0.012559	0.0378174	0.0406895
	Others	FFA	FFA	Not used	FFA Total	29.6211	15.7822	23.6877	84.1921	47.3305	114.538	103.842	58.2076	63.0121	12.8062	8.7829	8.90585	9.86653	16.9424	11.7878	52.7742	50.0117	6.64569	43.158	26.9388	16.86	12.0518	30.5142	77.3522	2.73112	2.96679	2.32541	69.9	78.1997	65.06	31.506	14.3551	33.5915	74.8305	42.4859	59.511	25.3451	19.2418	83.3851	6.2623	5.45664	7.05027	19.0181	21.2467
	Membrane	phospholipids	PI	Other ML	PI (16:0/DHA)	0.0149767	0.0113624	0.0371831	0.0151069	0.0148124	0.0130618	0.0497803	0.0123348	0.107825	0.00882448	0.0101626	0.0172573	0.026359	0.0333237	0.00383863	0.00734982	0.00948546	0.0701327	0.000539218	0.00184057	0.0031576	0.00043153	0.00245773	0.0019863	0.0177639	0.0303802	0.0322494	0.108592	0.0226289	0.121785	0.0432547	0.208514	0.102378	0.023772	0.0121705	0.00881275	0.0290875	0.0404966	0.310095	0.0323543	0.0537951	0.0829772	0.204139	0.184057
[truncated: 1 more columns]

## Sheet: Table S4_ANOVA 3-way
Table S4: Results of 3 way-mixed ANOVAs on the quantity (pg/cell) of different lipids compounds and groups.
Glyco lipids	(MGDG, DGDG, SQDG, Gluc Acid)		df	F	p
	Spp.		2	20.5	<0.01*
	HS [Spp.]		3	11.76	<0.01*
	Ti [Spp.]		3	10.07	<0.01*
	HS * Ti [Spp.]		3	0.45	0.71
Pigments	(Chlorophylls + Carotenoids)		df	F	p
	Spp.		2	40.95	<0.01*
	HS [Spp.]		3	11.32	<0.01*
	Ti [Spp.]		3	3.91	<0.01*
	HS * Ti [Spp.]		3	3.28	<0.01*
	Chlorophyll-a		df	F	p
	Spp.		2	35.88	<0.01*
	HS [Spp]		3	13.97	<0.01*
	Ti [Spp.]		3	4.15	<0.01*
	HS * Ti [Spp.]		3	4.65	<0.01*
	Carotenoids		df	F	p
	Spp.		2	40.28	<0.01*
	HS [Spp.]		3	8.66	<0.01*
	Ti [Spp.]		3	3.57	<0.01*
	HS * Ti [Spp.]		3	2.5	0.08
	Plastoquinone		df	F	p
	Spp.		2	31.46	<0.01*
	HS [Spp.]		3	15.4	<0.01*
	Ti [Spp.]		3	4.14	<0.01*
	HS * Ti [Spp.]		3	0.52	0.55
	PC		df	F	p
	Spp.		2	81.53	<0.01*
	HS [Spp.]		3	34.38	<0.01*
	Ti [Spp.]		3	26.85	<0.01*
	HS * Ti [Spp.]		3	1.41	0.26
	DGCC		df	F	p
	Spp.		2	59.72	<0.01*
	HS [Spp.]		3	33.61	<0.01*
	Ti [Spp.]		3	0.81	0.5
	HS * Ti [Spp.]		3	0.81	0.5
	Cardiolipin (CL)		df	F	p
	Spp.		2	45.75	<0.01*
	HS [Spp.]		3	3.07	<0.01*
	Ti [Spp.]		3	40.88	<0.01*
	HS * Ti [Spp.]		3	7.64	<0.01*
	Cholesterol		df	F	p
	Spp.		2	42.97	<0.01*
	HS [Spp.]		3	15.47	<0.01*
	Ti [Spp.]		3	15.85	<0.01*
	HS * Ti [Spp.]		3	15.54	<0.01*
Oxylipids	(Glyco-OH, PC-OH, DGCC-OH)		df	F	p
	Spp.		2	2.5	0.1
	HS [Spp.]		3	1.33	0.28
	Ti [Spp.]		3	11.4	<0.01*
	HS * Ti [Spp.]		3	3.33	<0.01*
	Glyco-OH		df	F	p
	Spp.		2	4.44	<0.01*
	HS [Spp.]		3	1.57	0.22
	Ti [Spp.]		3	9.25	<0.01*
	HS * Ti [Spp.]		3	2.48	0.08
	PC-OH		df	F	p
	Spp.		2	13.45	<0.01*
	HS [Spp.]		3	5.83	<0.01*
	Ti [Spp.]		3	28.81	<0.01*
	HS * Ti [Spp.]		3	7.37	<0.01*
	DGCC-OH		df	F	p
	Spp.		2	9.84	<0.01*
	HS [Spp.]		3	5.96	<0.01*
	Ti [Spp.]		3	20.24	<0.01*
	HS * Ti [Spp.]		3	10.71	<0.01*
Lyso lipids	(LGlyco, LPC, LDGCC)		df	F	p
	Spp.		2	12.55	<0.01*
	HS [Spp.]		3	9.09	<0.01*
	Ti [Spp.]		3	5.03	<0.01*
	HS * Ti [Spp.]		3	7.23	<0.01*
	LGlyco		df	F	p
	Spp.		2	14.04	<0.01*
	HS [Spp.]		3	17.08	<0.01*
	Ti [Spp.]		3	142.06	<0.01*
	HS * Ti [Spp.]		3	8.38	<0.01*
	LPC		df	F	p
	Spp.		2	14.86	<0.01*
	HS [Spp.]		3	15.41	<0.01*
	Ti [Spp.]		3	9.72	<0.01*
	HS * Ti [Spp.]		3	8.92	<0.01*
	LDGCC		df	F	p
	Spp.		2	42.56	<0.01*
	HS [Spp.]		3	0.96	0.426
	Ti [Spp.]		3	7.18	<0.01*
	HS * Ti [Spp.]		3	3.97	<0.01*
Saturation of glycolipids	SFA		df	F	p
	Spp.		2	0.15	0.85
	HS [Spp.]		3	2.31	0.1
	Ti [Spp.]		3	18	<0.01*
	HS * Ti [Spp.]		3	2.9	0.05
	MUFA		df	F	p
	Spp.		2	1.48	0.24
	HS [Spp.]		3	0.92	0.44
	Ti [Spp.]		3	17.53	<0.01*
	HS * Ti [Spp.]		3	1.46	0.24
	PUFA		df	F	p
	Spp.		2	52.35	<0.01*
	HS [Spp.]		3	21.44	<0.01*
	Ti [Spp.]		3	8.88	<0.01*
	HS * Ti [Spp.]		3	1.23	0.31
	oxi-PUFA		df	F	p
	Spp.		2	2.1	0.14
	HS [Spp.]		3	1.17	0.34
	Ti [Spp.]		3	13.33	<0.01*
	HS * Ti [Spp.]		3	2.42	0.09
Other ML	(Sphingo, PE, PG, PI, DGTS)		df	F	p
	Spp.		2	6.75	<0.01*
	HS [Spp.]		3	23.11	<0.01*
	Ti [Spp.]		3	9.21	<0.01*
	HS * Ti [Spp.]		3	15.42	<0.01*
	Sphingo lipids		df	F	p
	Spp.		2	32.3	<0.01*
	HS [Spp.]		3	7.49	<0.01*
	Ti [Spp.]		3	7.81	<0.01*
	HS * Ti [Spp.]		3	17.3	<0.01*
Storage Lipids	(TAG + CE)		df	F	p
	Spp.		2	8.28	<0.01*
	HS [Spp.]		3	6.62	<0.01*
	Ti [Spp.]		3	11.89	<0.01*
	HS * Ti [Spp.]		3	3.6	<0.01*
Fatty acids in storage lipids	SFA		df	F	p
	Spp.		2	8.28	<0.01*
	HS [Spp.]		3	6.62	<0.01*
	Ti [Spp.]		3	11.89	<0.01*
	HS * Ti [Spp.]		3	3.6	<0.01*
	MUFA		df	F	p
	Spp.		2	8.62	<0.01*
	HS [Spp.]		3	7.74	<0.01*
	Ti [Spp.]		3	12.35	<0.01*
	HS * Ti [Spp.]		3	3.4	<0.01*
	PUFA		df	F	p
	Spp.		2	10.94	<0.01*
	HS [Spp.]		3	5.24	<0.01*
	Ti [Spp.]		3	10.6	<0.01*
	HS * Ti [Spp.]		3	4.41	<0.01*
Oxylipins	(FFA-OH + FFA-OOH)		df	F	p
	Spp.		2	8.16	<0.01*
	HS [Spp.]		3	4.89	<0.01*
	Ti [Spp.]		3	6.49	<0.01*
	HS * Ti [Spp.]		3	6.15	<0.01*

## Sheet: TableS5_ANOVA 2-way
Table S4: Results of 2-way crossed ANOVAs on the quantity (pg/cell) of different lipids compounds and groups in each Symbiodiniaceae species.
	S. microadriaticum							B. minutum							C. goreaui
Glyco lipids	(MGDG, DGDG, SQDG, Gluc Acid)		df	F	p		Glyco lipids	(MGDG, DGDG, SQDG, Gluc Acid)		df	F	p		Glyco lipids	(MGDG, DGDG, SQDG, Gluc Acid)		df	F	p
	HS		1	3.18	0.11			HS		1	13.46	<0.01*			HS		1	15.31	<0.01*
	Ti		1	28.67	<0.01*			Ti		1	6.1	<0.01*			Ti		1	3.32	0.1
	HS*Ti		1	0.33	0.56			HS*Ti		1	0.64	0.44			HS*Ti		1	0.04	0.95
Saturation of glycolipids	SFA		df	F	p		Saturation of glycolipids	SFA		df	F	p		Saturation of glycolipids	SFA		df	F	p
	HS		1	1.43	0.26			HS		1	1.57	0.24			HS		1	11.47	<0.01*
	Ti		1	0.66	0.43			Ti		1	20.86	<0.01*			Ti		1	23.33	<0.01*
	HS*Ti		1	4.38	0.06			HS*Ti		1	1.06	0.33			HS*Ti		1	18.27	<0.01*
	MUFA		df	F	p			MUFA		df	F	p			MUFA		df	F	p
	HS		1	1.71	0.22			HS		1	0.21	0.65			HS		1	8.41	<0.01*
	Ti		1	0.13	0.72			Ti		1	17.34	<0.01*			Ti		1	42.79	<0.01*
	HS*Ti		1	6.92	<0.01*			HS*Ti		1	0.45	0.51			HS*Ti		1	6.39	<0.01*
	PUFA		df	F	p			PUFA		df	F	p			PUFA		df	F	p
	HS		1	4.81	0.05			HS		1	26.9	<0.01*			HS		1	15.33	<0.01*
	Ti		1	40.19	<0.01*			Ti		1	3.55	0.09			Ti		1	1.68	0.23
	HS*Ti		1	0.32	0.58			HS*Ti		1	1.69	0.22			HS*Ti		1	0.28	0.6
	oxi-PUFA		df	F	p			oxi-PUFA		df	F	p			oxi-PUFA		df	F	p
	HS		1	1.74	0.22			HS		1	0.27	0.61			HS		1	4.81	0.05
	Ti		1	0.02	0.87			Ti		1	17.57	<0.01*			Ti		1	27.61	<0.01*
	HS*Ti		1	0.05	0.81			HS*Ti		1	3.29	0.1			HS*Ti		1	4.25	0.07
Fatty acids in storage lipids	SFA		df	F	p		Fatty acids in storage lipids	SFA		df	F	p		Fatty acids in storage lipids	SFA		df	F	p
	HS		1	6.87	<0.01*			HS		1	6.36	<0.01*			HS		1	3.17	0.11
	Ti		1	0.9	0.36			Ti		1	12.71	<0.01*			Ti		1	44.56	<0.01*
	HS*Ti		1	0.63	0.44			HS*Ti		1	3.47	0.09			HS*Ti		1	9.83	<0.01*
	MUFA		df	F	p			MUFA		df	F	p			MUFA		df	F	p
	HS		1	0.01	0.9			HS		1	8.06	<0.01*			HS		1	0.03	0.85
	Ti		1	14.34	<0.01*			Ti		1	5.55	<0.01*			Ti		1	29.22	<0.01*
	HS*Ti		1	0.49	0.5			HS*Ti		1	3.12	0.11			HS*Ti		1	17.27	<0.01*
	PUFA		df	F	p			PUFA		df	F	p			PUFA		df	F	p
	HS		1	2.48	0.15			HS		1	3.86	0.08			HS		1	79.62	<0.01*
	Ti		1	3.5	0.09			Ti		1	3.28	0.1			Ti		1	51.99	<0.01*
	HS*Ti		1	1.69	0.22			HS*Ti		1	1.82	0.21			HS*Ti		1	13.89	<0.01*

## Sheet: Table S6_SIMPER
Tables S6: Pairwise tests from Similarity Percentages (SIMPER) analysis for the 20 lipid compounds with the largest contributions to dissimilarities between different comparisons among all the symbiont species, between heat shock treatment and control populations.
S. microadriaticum
S. microadriaticum (A1): AC4 X AT4						S. microadriaticum (A1): AC2444 X AT244						S. microadriaticum (A1): AT28 X AT4						S. microadriaticum (A1): AT244 X AT28
Bray-Curtis average dissimilarity = 24.69						Bray-Curtis average dissimilarity = 34.71						Bray-Curtis average dissimilarity = 40.70						Bray-Curtis average dissimilarity = 64.06
AC4 X AT4	TOP 20 lipid species	Avg [AC4]	Avg [AT4]	Contribution (%)		AT244 x AC244	TOP 20 lipid species	Avg [AT244]	Avg [AC244]	Contribution (%)		AT28 x AT4	TOP 20 lipid species	Avg [AT28]	Avg [AT4]	Contribution (%)		AT244 x AT28	TOP 20 lipid species	Avg [AT244]	Avg [AT28]	Contribution (%)
1	DGDG (18:4/18:5)	1.67	2.79	14.35		1	MGDG (18:4/18:5)	0.52	1.27	17.74		1	MGDG (18:4/18:5)	5.09	10.33	28.06		1	MGDG (18:4/18:5)	10.33	1.27	26.6
2	MGDG (18:4/18:5)	4.09	5.09	12.87		2	DGDG (18:4/18:5)	0.78	1.33	15.47		2	DGDG (18:4/18:5)	2.79	4.81	13.14		2	DGDG (18:4/18:5)	4.81	1.33	11.07
3	Cholesterol	0.16	0.96	10.04		3	Cholesterol	0.62	0.36	9.27		3	DGCC (16:0/DHA)	1.74	3.25	8.22		3	DGCC (16:0/DHA)	3.25	0.61	7.74
4	DGCC (16:0/DHA)	1.16	1.74	7.62		4	DGCC (16:0/DHA)	0.33	0.61	6.37		4	MGDG (18:4/18:4)	1.06	2.72	7.6		4	MGDG (18:4/18:4)	2.72	0.28	7.08
5	PG (18:1/18:1)	0.23	0.69	6.11		5	DGDG (18:4/18:4)	0.3	0.51	6.08		5	PC (18:1/19:1)	1.08	2.06	4.94		5	PG (18:1/18:1)	1.49	0.14	5.68
6	DGDG (18:4/18:4)	0.48	0.89	5.2		6	PC (18:1/19:1)	0.2	0.43	5.31		6	DGDG (18:4/18:4)	0.89	1.82	4.75		6	PC (18:1/19:1)	2.06	0.43	4.99
7	PC (18:1/19:1)	0.72	1.08	4.74		7	MGDG (18:4/18:4)	0.13	0.28	3.63		7	PG (18:1/18:1)	0.69	1.49	4.03		7	DGDG (18:4/18:4)	1.82	0.51	4.08
8	MGDG (18:4/18:4)	0.81	1.06	3.33		8	SQDG (14:0/16:0)	0.12	0.18	2.75		8	Cholesterol	0.96	1.41	2.69		8	Cholesterol	1.41	0.36	3.66
9	PG (18:1/19:1)	0.04	0.23	2.46		9	SQDG (14:0/16:1)	0.09	0.16	2.41		9	PG (18:1/19:1)	0.23	0.59	1.74		9	PG (18:1/19:1)	0.59	0.06	2.25
10	SQDG (14:0/16:0)	0.23	0.05	2.37		10	Gluc Acid (16:0/DHA)	0.03	0.12	2.32		10	PG (16:0/18:1)	0.27	0.53	1.41		10	PG (16:0/18:1)	0.53	0.05	2.12
11	PG (16:0/18:1)	0.08	0.27	2.28		11	Lyso MGDG (16:0)	0.11	0.07	2.23		11	PC (DHA/DHA)	0.17	0.37	1.06		11	PE (18:1/18:1)	0.32	0.04	1.17
12	MGDG (16:0/18:1)	0.21	0.06	2.04		12	MGDG (16:0/18:4)	0.22	0.19	2.16		12	PC (16:0/DHA)	0.21	0.41	0.99		12	PE (16:0/18:1)	0.26	0.01	0.99
13	PE (18:1/18:1)	0.04	0.15	1.53		13	DGDG (18:4/18:5-OH)	0.06	0.06	1.58		13	DGCC (18:0/28:7)	0.12	0.34	0.95		13	PC (16:0/DHA)	0.41	0.07	0.98
14	PE (14:0/16:1)	0.05	0.16	1.51		14	PG (18:1/18:1)	0.08	0.14	1.57		14	PE (18:1/18:1)	0.15	0.32	0.92		14	DGCC (18:0/28:7)	0.34	0.02	0.96
15	PE (16:0/18:1)	0.02	0.14	1.47		15	SQDG (14:1/16:0)	0.09	0.1	1.15		15	SQDG (14:0/16:0)	0.05	0.28	0.91		15	PC (DHA/DHA)	0.37	0.05	0.91
16	PE (16:1/18:1)	0.02	0.11	1.17		16	MGDG (18:4/18:5-OH)	0.04	0.04	0.95		16	MGDG (16:0/18:4)	0.16	0.38	0.84		16	PG (16:1/18:1)	0.22	0.02	0.86
17	PE (16:0/16:1)	0.02	0.11	1.07		17	DGDG (18:5/18:4-OH)	0.04	0.03	0.88		17	DGCC (DHA/DHA)	0.03	0.26	0.83		17	PE (14:0/16:1)	0.23	0.02	0.78
18	PG (16:0/16:1)	0.03	0.1	0.91		18	PC (16:0/DHA)	0.04	0.07	0.8		18	MGDG (16:0/18:2)	0.03	0.24	0.81		18	SQDG (14:0/16:0)	0.28	0.18	0.68
19	MGDG (16:0/18:2)	0.1	0.03	0.91		19	DGDG (16:2/18:4)	0.04	0.07	0.78		19	PE (16:0/18:1)	0.14	0.26	0.69		19	PE (16:1/18:1)	0.16	0.01	0.65
20	PG (16:1/18:1)	0.04	0.11	0.88		20	PG (16:2/20:2)	0.03	0.07	0.7		20	PE (14:0/16:1)	0.16	0.23	0.68		20	MGDG (16:0/18:4)	0.38	0.22	0.64
B. minutum
B. minutum (B1): BC4 X BT4						B. minutum (B1): BC244 X BT244						B. minutum (B1): BT28 X BT4						B. minutum (B1): BT244 X BT28
Bray-Curtis average dissimilarity = 48.75						Bray-Curtis average dissimilarity = 69.86						Bray-Curtis average dissimilarity = 57.12						Bray-Curtis average dissimilarity = 62.32
BC4 x BT4	TOP 20 lipid species	Avg [BC4]	Avg [BT4]	Contribution (%)		BC244 x BT244	TOP 20 lipid species	Avg [BC244]	Avg [BT244]	Contribution (%)		BT28 x BT4	TOP 20 lipid species	Avg [BT28]	Avg [BT4]	Contribution (%)		BT244 x BT28	TOP 20 lipid species	Avg [BT244]	Avg [BT28]	Contribution (%)
1	MGDG (18:4/18:5)	1.29	0.24	26.62		1	Cholesterol	2.89	0.14	11.57		1	PG (18:1/18:1)	1.91	0.47	16.07		1	MGDG (18:4/18:5)	0.25	1.96	9.06
2	DGDG (18:4/18:5)	0.66	0.2	11.97		2	PG (18:1/18:1)	0.05	2.49	9.14		2	Lyso MGDG (16:0)	1.77	0	10.36		2	Lyso MGDG (16:0)	1.77	0.87	7
3	DGCC (16:0/DHA)	0.38	0.09	7.57		3	SQDG (14:0/16:0)	1.8	0.52	5.82		3	Lyso MGDG (18:4)	1.44	0.01	8.31		3	DGCC (16:0/DHA)	0.11	1.25	6.02
4	DGDG (18:4/18:4)	0.38	0.12	6.85		4	MGDG (18:4/18:5-OH)	0.04	1.51	3.77		4	PG (16:0/18:1)	0.74	0.15	6.99		4	Lyso MGDG (18:4)	1.44	0.64	5.65
5	MGDG (18:4/18:4)	0.26	0.06	5.11		5	Gluc Acid (16:0/DHA)	1.14	0.14	3.48		5	Lyso MGDG (18:5)	1.03	0.01	5.97		5	PG (18:1/18:1)	1.91	2.49	5.6
6	PC (18:1/19:1)	0.26	0.06	4.97		6	SQDG (14:1/16:0)	1.01	0.26	3.45		6	PG (18:1/19:1)	0.48	0.11	4.16		6	MGDG (18:4/18:5-OH)	0.54	1.51	5.39
7	PG (18:1/18:1)	0.33	0.47	3.75		7	DGCC (16:0/DHA)	0.41	1.25	3.43		7	Cholesterol	0.14	0.38	3.33		7	Lyso MGDG (18:5)	1.03	0.79	4.5
8	MGDG (16:0/18:4)	0.12	0.01	2.78		8	MGDG (18:4/18:5)	1.09	1.96	3.41		8	MGDG (18:4/18:5-OH)	0	0.54	3.2		8	DGDG (18:4/18:5-OH)	0.45	1.16	4.21
9	SQDG (14:0/16:0)	0.12	0.02	2.62		9	SQDG (14:0/16:1)	0.93	0.24	2.95		9	PE (18:1/18:1)	0.07	0.33	3.01		9	DGDG (18:4/18:5)	0.2	0.8	3.33
10	Cholesterol	0.16	0.14	1.39		10	DGDG (18:4/18:5-OH)	0.04	1.16	2.88		10	MGDG (18:4/18:5)	0.24	0.25	2.74		10	DGDG (18:4/18:4)	0.12	0.72	3.01
11	PG (16:0/18:1)	0.12	0.15	1.05		11	PE (18:1/18:1)	0.01	0.78	2.83		11	DGDG (18:4/18:5-OH)	0.01	0.45	2.66		11	SQDG (14:0/16:0)	0.04	0.52	2.7
12	DGCC (DHA/DHA)	0.04	0	1.02		12	PG (16:0/18:1)	0.02	0.81	2.72		12	DGDG (18:4/18:5)	0.2	0.2	2.63		12	DGDG (18:5/18:4-OH)	0.25	0.68	2.43
13	PG (18:1/19:1)	0.07	0.11	1.02		13	PG (18:1/19:1)	0.02	0.64	2.24		13	PG (16:1/18:1)	0.03	0.22	2.04		13	MGDG (16:0/18:4)	0.02	0.51	2.38
14	Lyso DGDG (18:4)	0.07	0.08	0.86		14	Lyso MGDG (16:0)	0.01	0.87	2.17		14	PE (16:0/18:1)	0.05	0.21	1.96		14	PG (16:0/18:1)	0.74	0.81	2.33
15	PC (DHA/DHA)	0.04	0.01	0.76		15	Lyso MGDG (18:5)	0.01	0.79	2.04		15	DGDG (18:4/18:4-OH)	0	0.33	1.95		15	MGDG (18:4/18:4)	0.07	0.5	2.25
16	MGDG (18:4/DHA)	0.03	0	0.7		16	DGTS (18:1/18:1)	0.5	0	1.99		16	Lyso PC (DHA)	0	1.1	1.95		16	PE (18:1/18:1)	0.33	0.78	2.24
17	DGDG (18:4/DHA)	0.03	0.01	0.69		17	DGTS (16:0/18:1)	0.44	0	1.94		17	PE (16:1/18:1)	0.03	0.16	1.51		17	DGDG (18:4/18:4-OH)	0.33	0.46	1.94
18	PC (16;0/DHA)	0.04	0.01	0.68		18	Lyso MGDG (18:4)	0.02	0.64	1.69		18	DGDG (18:5/18:4-OH)	0	0.25	1.44		18	Lyso PC (16:0)	0.01	0.47	1.77
19	PI (16:0/DHA)	0.03	0	0.68		19	DGDG (18:5/18:4-OH)	0.02	0.68	1.68		19	DGDG (18:4/18:4)	0.12	0.12	1.4		19	SQDG (14:1/16:0)	0.02	0.26	1.54
20	SQDG (14:0/16:1)	0.03	0.01	0.67		20	DGTS (14:0/18:1)	0.34	0	1.5		20	PG (16:0/16:1)	0.03	0.14	1.35		20	PG (18:1/19:1)	0.48	0.64	1.48
C. goreaui
C. goreaui (C1): CC4 X CT4						C. goreaui (C1): CC244 X CT244						C. goreaui (C1): CT28 X CT4						C. goreaui (C1): CT244 X CT28
Bray-Curtis average dissimilarity = 45.81						Bray-Curtis average dissimilarity = 42.53						Bray-Curtis average dissimilarity = 47.07						Bray-Curtis average dissimilarity = 42.29
CC4 x CT4	TOP 20 lipid species	Avg [CC4]	Avg [CT4]	Contribution (%)		CC244 x CT244	TOP 20 lipid species	Avg [CC244]	Avg [CT244]	Contribution (%)		CT28 x CT4	TOP 20 lipid species	Avg [CT28]	Avg [CT4]	Contribution (%)		CT244 x CT28	TOP 20 lipid species	Avg [CT244]	Avg [CT28]	Contribution (%)
1	Lyso DGDG (18:4)	1.79	0.02	18.29		1	MGDG (18:4/18:5)	3.8	1.39	20.98		1	MGDG (18:4/18:5)	1.42	2.3	12.7		1	MGDG (18:4/18:5)	2.3	3.8	18.19
2	MGDG (18:5/18:5)	1.28	0.19	11.22		2	DGDG (18:4/18:4)	2.06	0.69	12.56		2	Cholesterol	0.05	1	11.51		2	Cholesterol	1	0.04	8.57
3	MGDG (18:4/18:5)	2.28	1.42	10.55		3	MGDG (18:5/18:5)	1.53	0.46	9.57		3	DGDG (18:4/18:4)	0.79	1.56	8.1		3	MGDG (18:5/18:5)	0.51	1.53	8.23
4	DGDG (18:4/18:4)	1.41	0.79	6.6		4	MGDG (18:4/18:4)	1.29	0.56	6.57		4	MGDG (18:4/18:4)	0.67	1.09	6.95		4	DGDG (18:4/18:4)	1.56	2.06	7.77
5	DGCC (16:0/DHA)	0.79	0.28	5.25		5	DGDG (18:4/18:5)	1.09	0.39	6.29		5	DGCC (16:0/DHA)	0.28	0.88	5.7		5	MGDG (18:4/18:4)	1.09	1.29	7.34
6	Lyso DGDG (18:5)	0.45	0.01	4.55		6	DGCC (16:0/DHA)	0.92	0.34	5.3		6	PC (18:1/19:1)	0.19	0.61	5.2		6	DGDG (18:4/DHA)	0.21	0.84	4.95
7	MGDG (18:4/18:4)	0.98	0.67	4.05		7	DGDG (18:4/DHA)	0.84	0.28	5.21		7	DGDG (18:4/18:5)	0.44	0.79	4.04		7	DGDG (18:4/18:5)	0.79	1.09	4.48
8	PC (18:1/19:1)	0.56	0.19	3.81		8	PC (18:1/19:1)	0.54	0.23	2.78		8	SQDG (14:0/16:0)	0.01	0.36	4.04		8	DGCC (16:0/DHA)	0.88	0.92	3.17
9	DGDG (18:4/18:5)	0.74	0.44	3.3		9	Cholesterol	0.04	0.24	2.09		9	MGDG (18:5/18:5)	0.19	0.51	3.19		9	PC (18:1/19:1)	0.61	0.54	2.8
10	PC (16:0/DHA)	0.41	0.11	3.16		10	MGDG (18:4/DHA)	0.38	0.14	2.06		10	Lyso PC (DHA)	0.31	0	3.14		10	PG (18:1/18:1)	0.39	0.08	2.53
11	MGDG (16:0/18:4)	0.37	0.1	2.7		11	PC (16:0/DHA)	0.25	0.09	1.52		11	MGDG (16:0/18:4)	0.1	0.43	3.11		11	SQDG (14:0/16:0)	0.36	0.09	2.34
12	PG (18:1/18:1)	0.21	0.33	1.86		12	MGDG (16:0/18:4)	0.31	0.14	1.47		12	PC (16:0/DHA)	0.11	0.31	2.6		12	MGDG (18:4/DHA)	0.15	0.38	2.04
13	PC (DHA/DHA)	0.23	0.06	1.84		13	Gluc Acid (16:0/DHA)	0.05	0.19	1.4		13	PG (18:1/18:1)	0.33	0.39	2.13		13	PC (16:0/DHA)	0.31	0.25	1.72
14	SQDG (14:0/16:0)	0.16	0.01	1.7		14	SQDG (14:0/16:0)	0.09	0.211	1.32		14	PC (DHA/DHA)	0.06	0.15	1.47		14	MGDG (16:0/18:4)	0.43	0.31	1.6
15	Lyso PC (DHA)	0.23	0.31	1.24		15	SQDG (14:0/16:1)	0.1	0.23	1.29		15	PI (16:0/DHA)	0.01	0.13	1.41		15	PC (DHA/DHA)	0.15	0.19	1.23
16	PI (16:0/DHA)	0.12	0.01	1.18		16	SQDG (14:1/16:0)	0.12	0.18	1.18		16	DGDG (18:4/DHA)	0.07	0.21	1.35		16	Lyso PC (DHA)	0	0.13	0.93
17	DGDG (18:4/DHA)	0.16	0.07	0.99		17	PC (DHA/DHA)	0.19	0.06	1.16		17	PG (18:1/19:1)	0.12	0.21	1.15		17	PI (16:0/DHA)	0.13	0.06	0.91
18	Gluc Acid (16:0/DHA)	0.08	0	0.9		18	PG (16:1/19:2)	0.19	0.08	1.06		18	PG (16:1/19:2)	0.02	0.12	1.08		18	Lyso MGDG (18:5)	0.01	0.12	0.8
19	Lyso DGDGD (DHA)	0.08	0	0.84		19	PI (16:0/DHA)	0.06	0.16	1.02		19	MGDG (18:4/DHA)	0.04	0.15	0.98		19	PG (16:0/18:1)	0.11	0.02	0.76
20	PC (16:0/18:4)	0.1	0.02	0.79		20	DGDG (18:3/18:4)	0.18	0.08	0.94		20	SQDG (14:0/16:1)	0.01	0.09	0.98		20	MGDG (16:1/18:5)	0.02	0.12	0.75
